# Supplementary material for: Microwave assisted synthesis and QSAR study of novel NSAID acetaminophen conjugates with amino acid linkers
Source: Royal Society of Chemistry journal article supplement (doi:10.1039/c4ob01281j), 2014-07-23
Supplement: c4ob01281j1.pdf [file c4ob01281j1.pdf]

## Supporting Information

### **Microwave assisted synthesis and QSAR study of novel NSAID acetaminophen conjugates with amino acid linkers**

Anand D. Tiwari,<sup>a</sup> Siva S. Panda,<sup>\*,a</sup> Adel S. Girgis,<sup>b</sup> Sandhyamayee Sahu,<sup>a</sup> Riham F. George,<sup>c</sup>  
Aladdin M. Srour,<sup>d</sup> Brian La Starza,<sup>a</sup> Abdullah M. Asiri,<sup>e,f</sup> C. Dennis Hall<sup>\*,a</sup> and Alan R. Katritzky<sup>†a,e</sup>

<sup>a</sup>*Center for Heterocyclic Compounds, Department of Chemistry, University of Florida,  
Gainesville, FL 32611-7200, USA. [tel: +1-352-392-0554](tel:+13523920554)*

<sup>b</sup>*Pesticide Chemistry Department, National Research Centre, Dokki, Cairo 12622, Egypt*

<sup>c</sup>*Pharmaceutical Chemistry Department, Faculty of Pharmacy, Cairo University, Cairo, Egypt*

<sup>d</sup>*Therapeutical Chemistry Department, National Research Centre, Dokki, Cairo, Egypt*

<sup>e</sup>*Center of Excellence for Advanced Material Research, King Abdulaziz University, Jeddah,  
21589, Saudi Arabia*

<sup>f</sup>*Department of Chemistry, King Abdulaziz University, Jeddah, 21589, Saudi Arabia*

*E-mail: [sspanda12@gmail.com](mailto:sspanda12@gmail.com), [charlesdennishall@gmail.com](mailto:charlesdennishall@gmail.com)*

#### Table of contents

|                                                                                                       |     |
|-------------------------------------------------------------------------------------------------------|-----|
| 1. Copy of <sup>1</sup> H NMR, <sup>13</sup> C NMR, CHN/HRMS of compounds <b>3a–d</b> and <b>6a–l</b> | S2  |
| 2. HPLC of compound <b>6b</b> and <b>6f</b>                                                           | S50 |
| 3. Figure S1. Mean edema thickness (mm) of the tested compounds                                       | S51 |
| 4. Figure S2. % Inhibition of edema for the tested compounds                                          | S52 |
| 5. Figure S3. Anti-inflammatory potency of the tested compounds                                       | S53 |
| 6. Figure S4. Ulcer index of the most promising anti-inflammatory active agents                       | S54 |

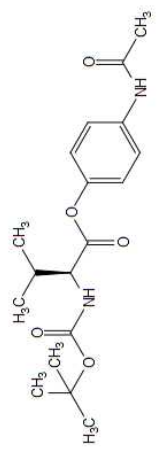

3a

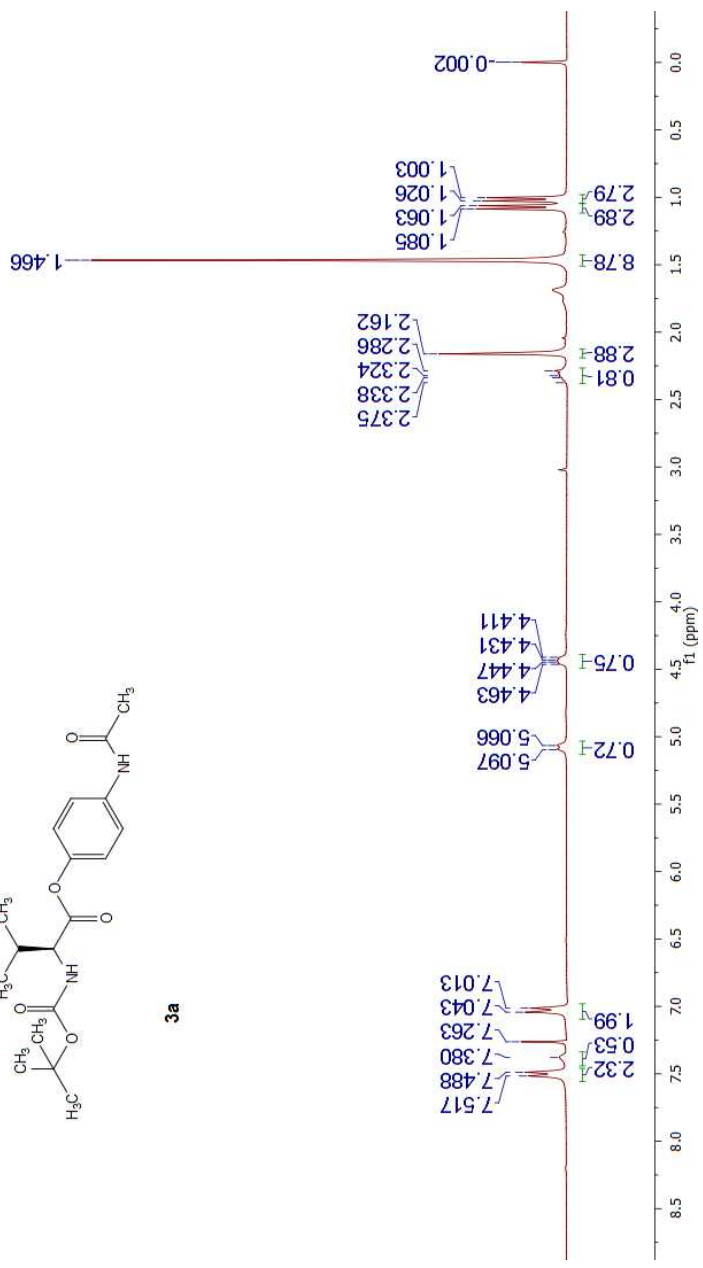

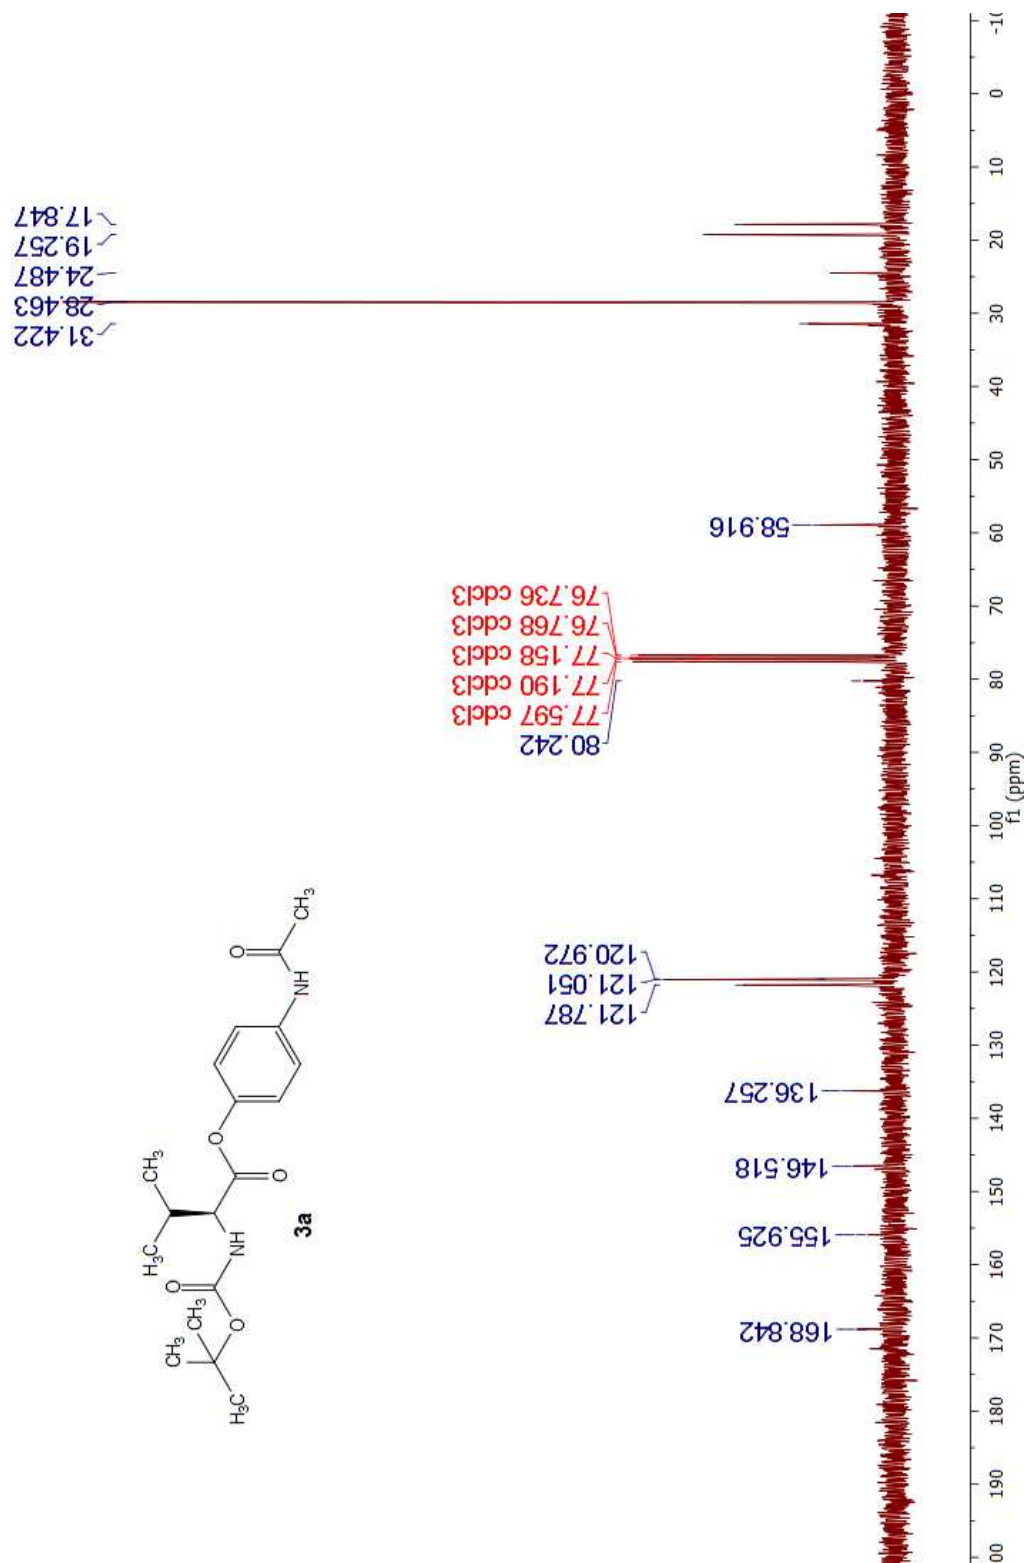

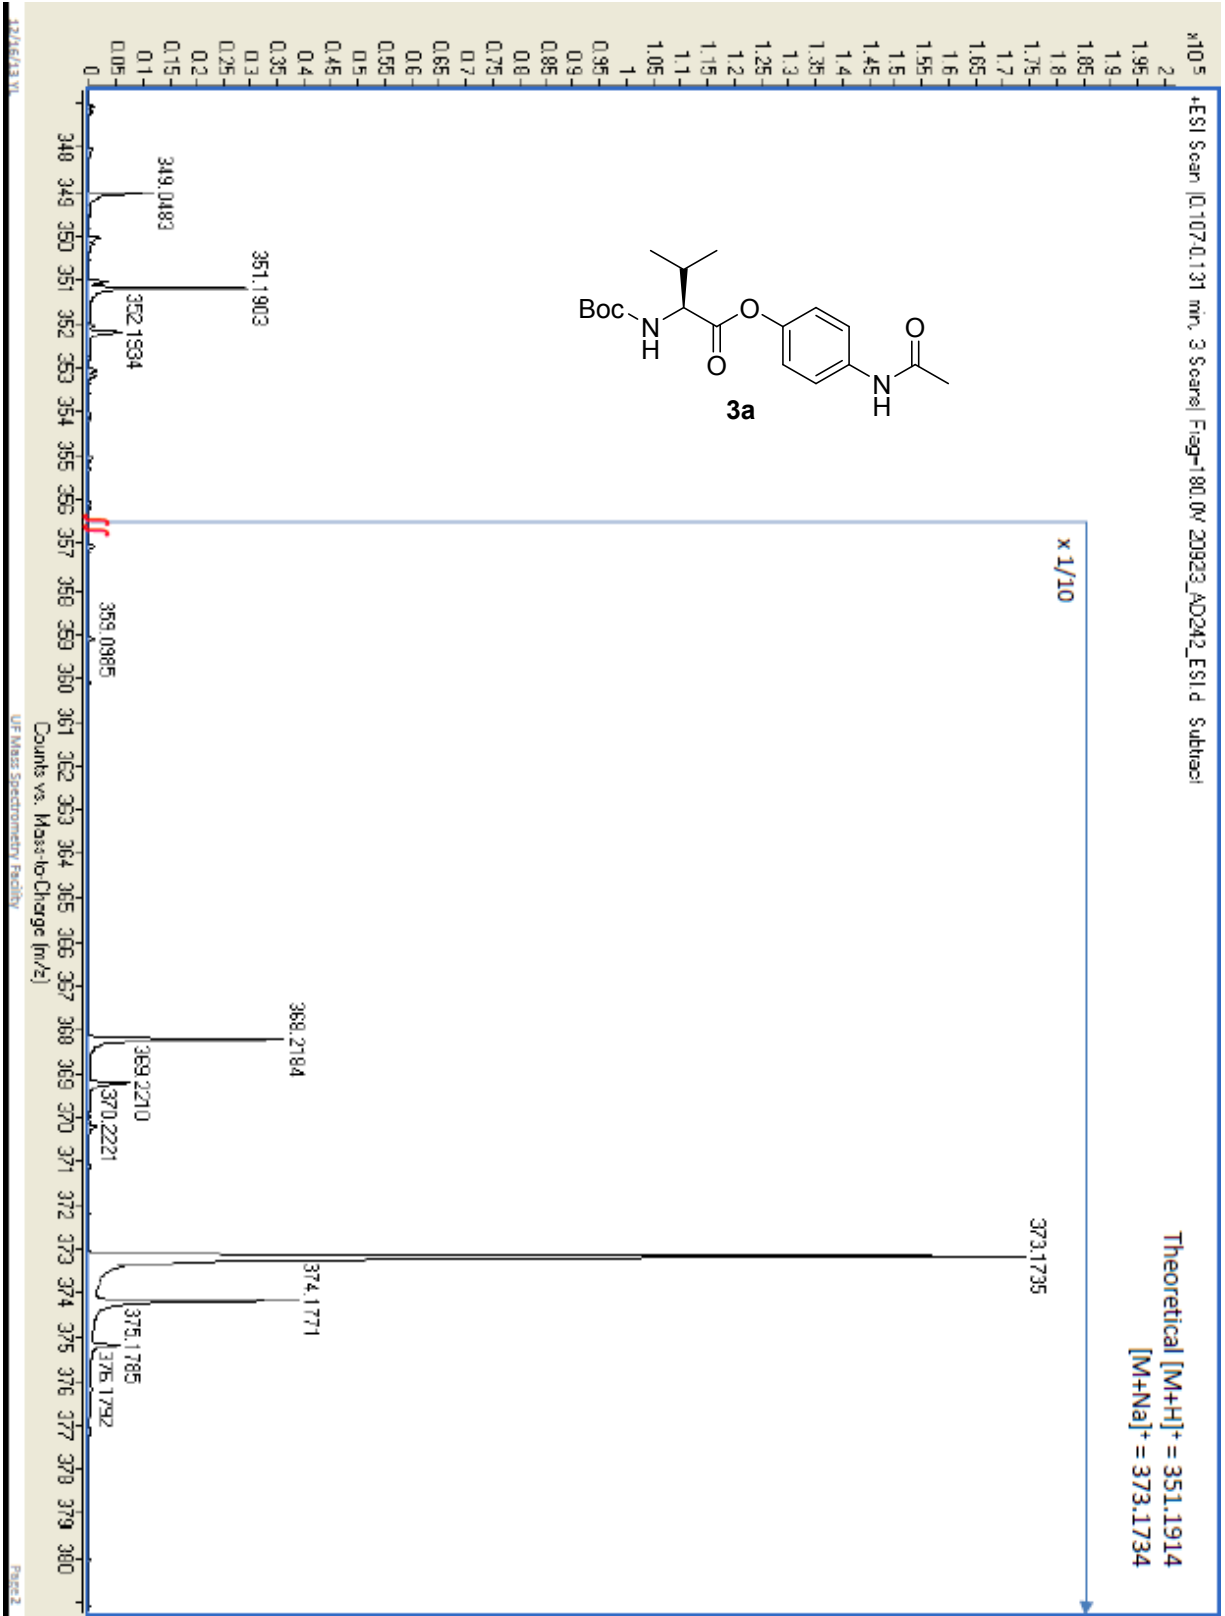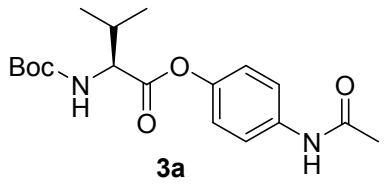

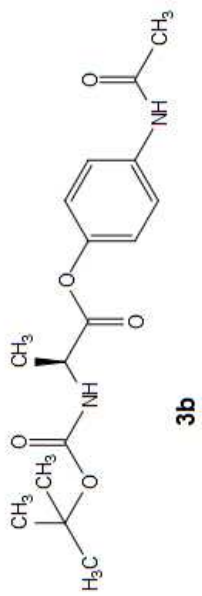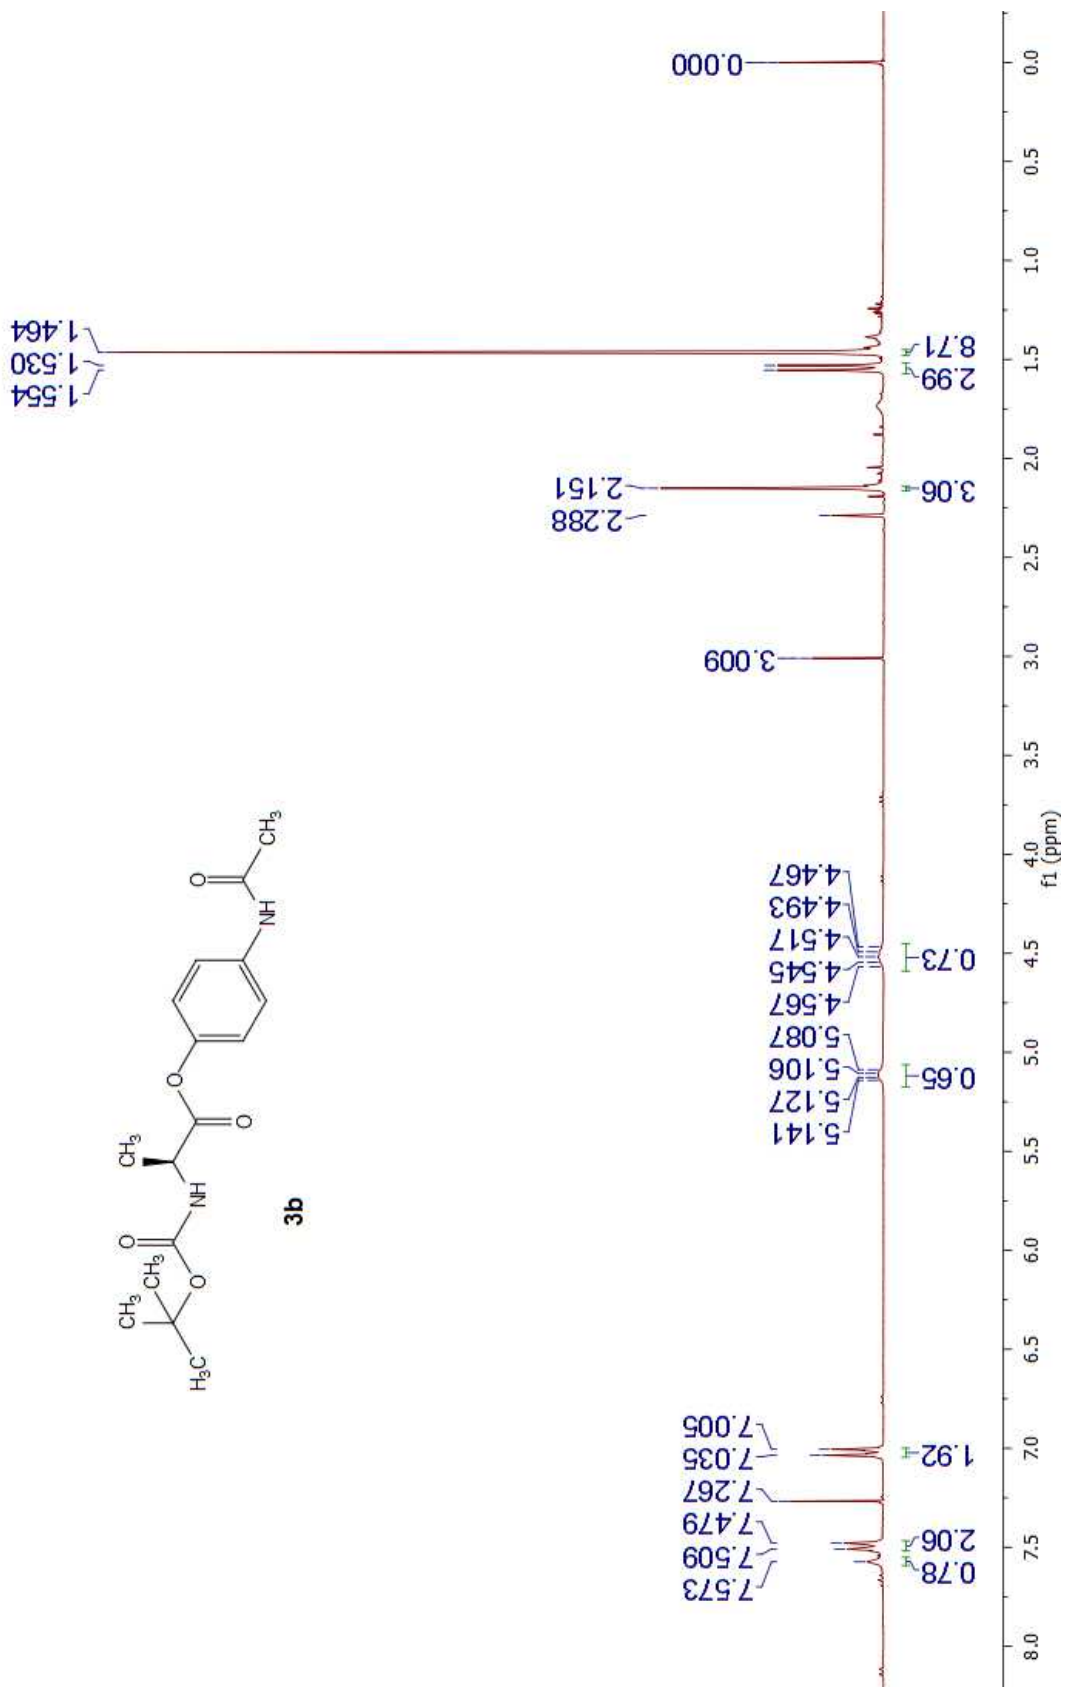

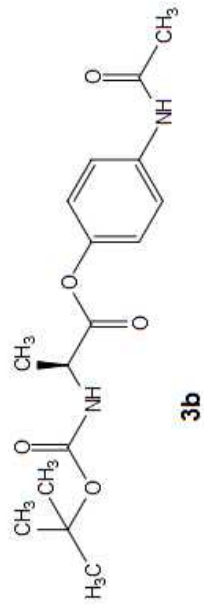

28.307  
24.357  
18.326

80.177  
77.443 cdcl3  
77.020 cdcl3  
76.597 cdcl3

121.867  
121.588  
120.885

135.955

146.478

154.824  
155.098  
155.223

168.626  
172.306

49.467

180 170 160 150 140 130 120 110 100 90 80 70 60 50 40 30 20 10

EAGER 200 Stripchart

Sample Ident. : 12 AD198      Filename : 282712  
 Analysed : 10-15-13 10:15:19      Printed : 10-15-2013 10:25:21

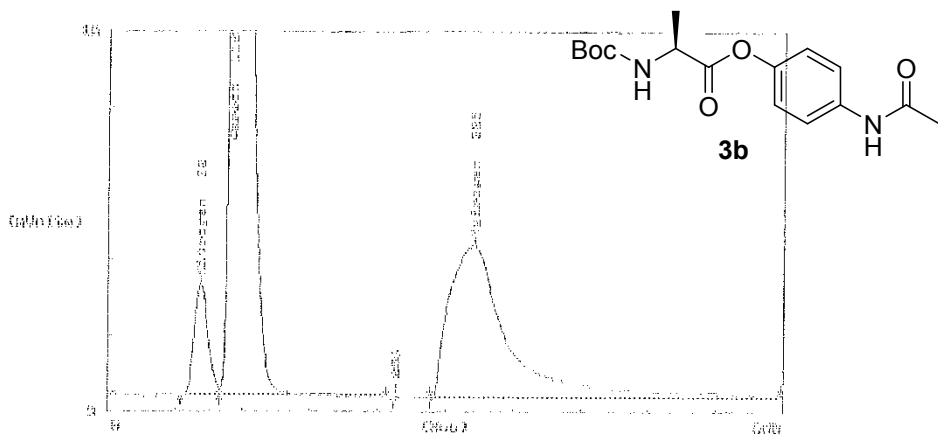

EAGER 200 Peak Integration Report

Instrument name : Instrument #1      Bline drift (fV): 17.5  
 Company Name : U of Florida      Operator Ident. : KOU  
 Analysed : 10-15-13 10:15:19      Printed : 10-15-2013 10:25:22  
 Sample Ident. : 12 AD198      Filename : 282712  
 Sample Weight : 2.135      Calc.method: using 'K. Factors'

| No. (#) | Type | Start (Sec) | End (Sec) | Ret Time (Sec) | Height (fV) | Area (fV*Sec) | Area % (%) | Name     |
|---------|------|-------------|-----------|----------------|-------------|---------------|------------|----------|
| 1       | FU   | 65          | 100       | 82             | 2890.6      | 38910         | 3.85       | Nitrogen |
| 2       | FU   | 100         | 248       | 110            | 49474.4     | 737682        | 73.03      | Carbon   |
| 3       | RS   | 254         | 287       | 256            | 5.1         | 74            | 0.01       |          |
| 4       | RS   | 287         | 598       | 325            | 3932.2      | 233497        | 23.11      | Hydrogen |
|         |      |             |           |                |             |               | 1010164    | 100.00   |

EAGER 200 Unk Report

Instrument name : Instrument #1      Bline drift (fV): 17.5  
 Company Name : U of Florida      Operator Ident. : KOU  
 Analysed : 10-15-13 10:15:19      Printed : 10-15-2013 10:25:22  
 Sample Ident. : 12 AD198      Filename : 282712  
 Sample Weight : 2.135      Calc.method: using 'K. Factors'

| Pk. (#) | Ret Time (Sec) | Area (fV*Sec) | Element % (%) | Area Ratio  | Name     |
|---------|----------------|---------------|---------------|-------------|----------|
| 1       | 82             | 38910         | 8.773         | .189585E+02 | Nitrogen |
| 2       | 110            | 737682        | 59.623        | .100000E+01 | Carbon   |
| 4       | 325            | 233497        | 7.190         | .315929E+01 | Hydrogen |

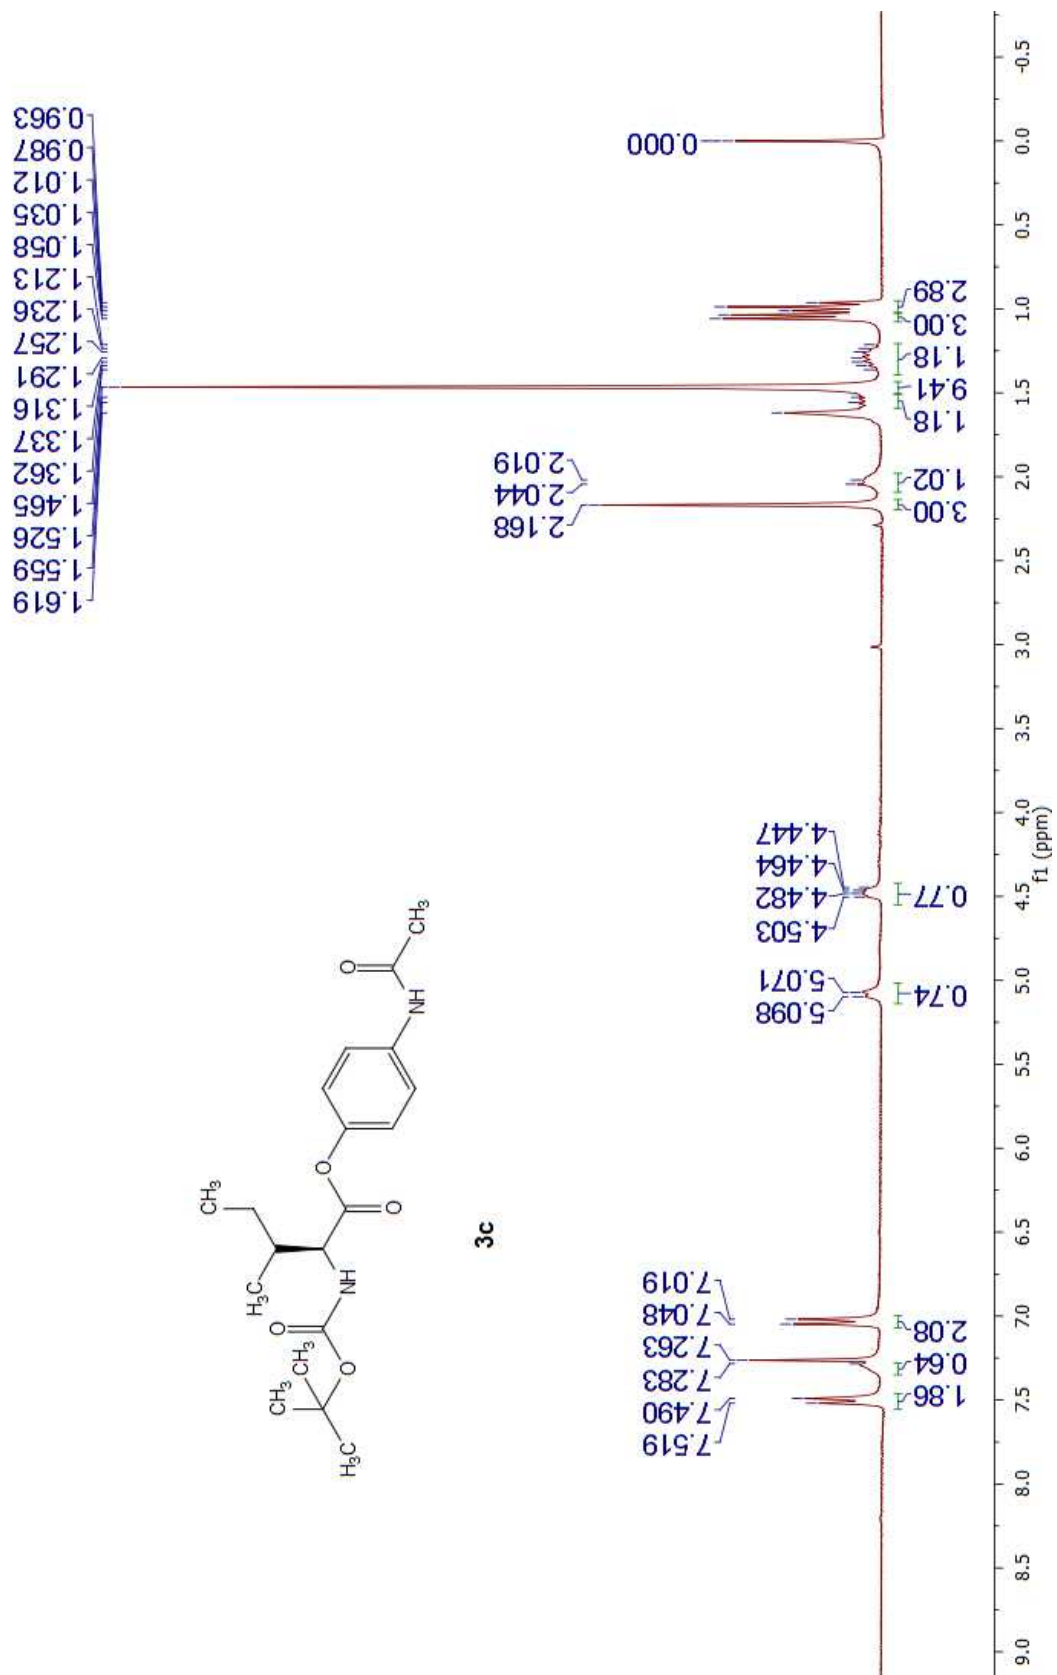



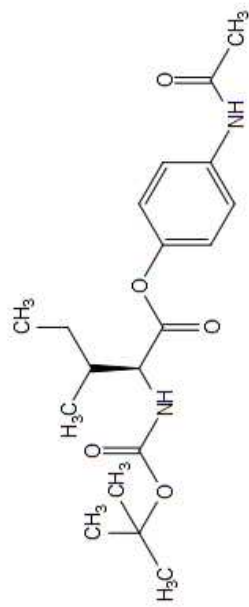

**3c**

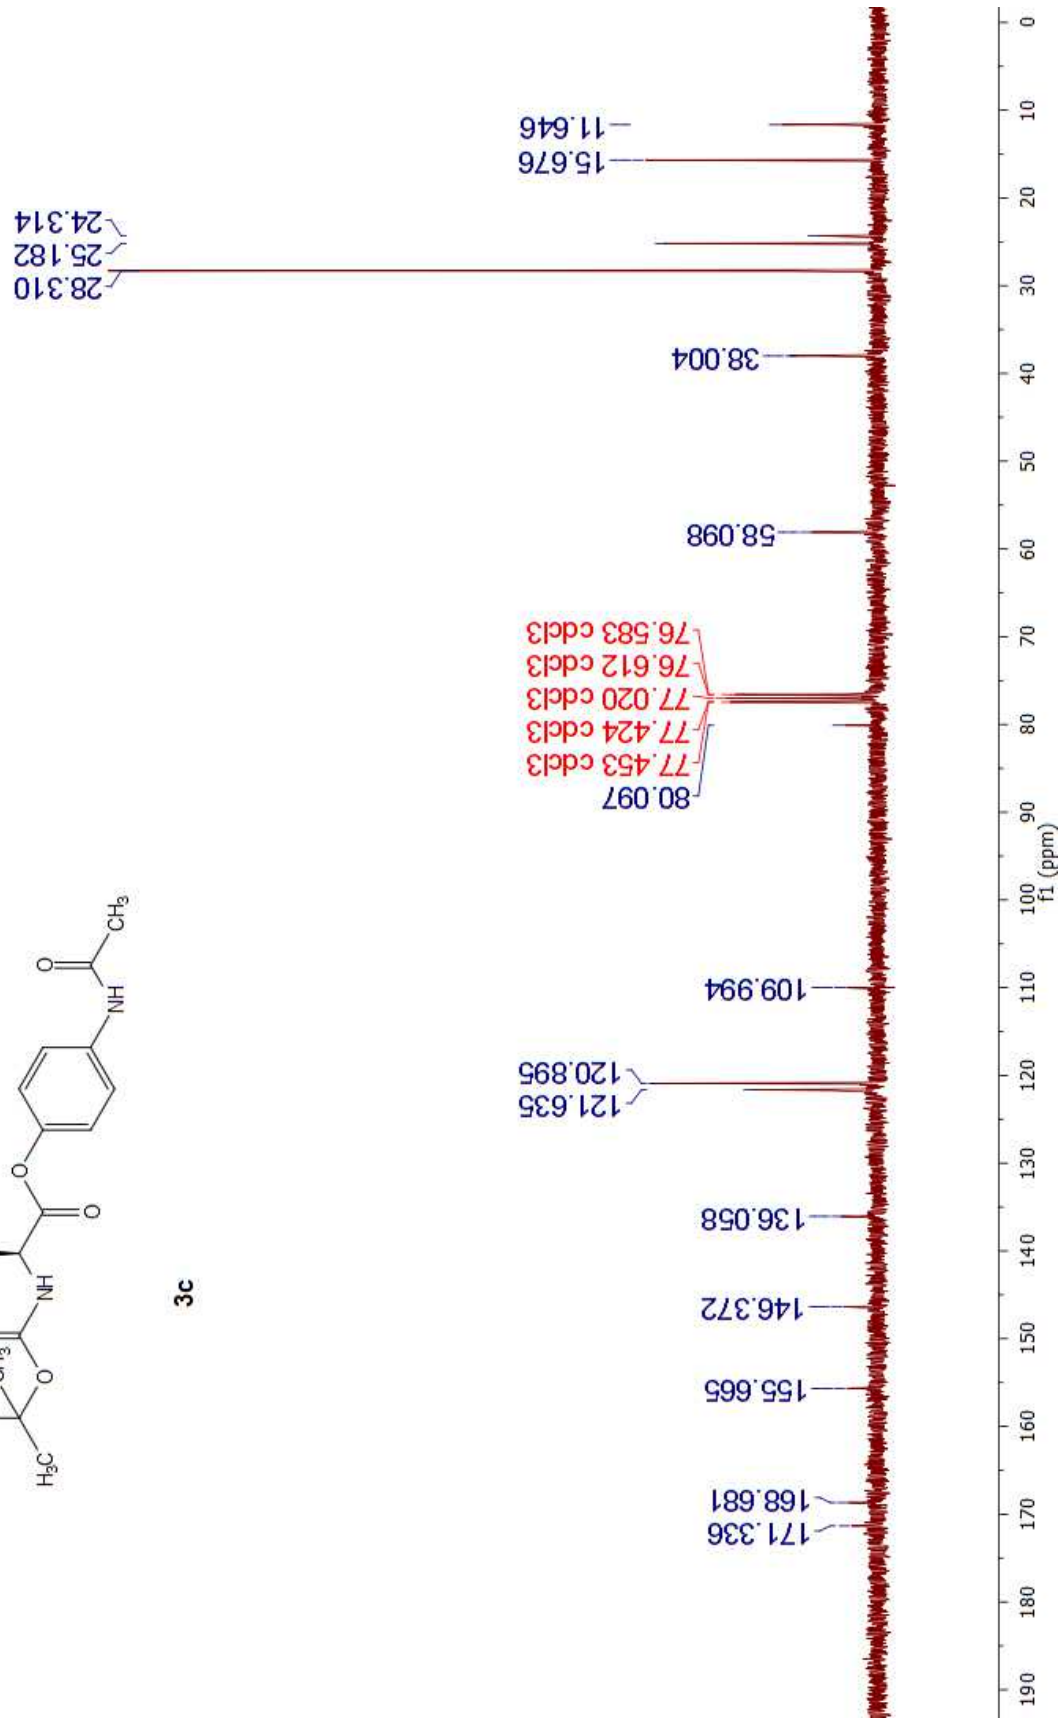

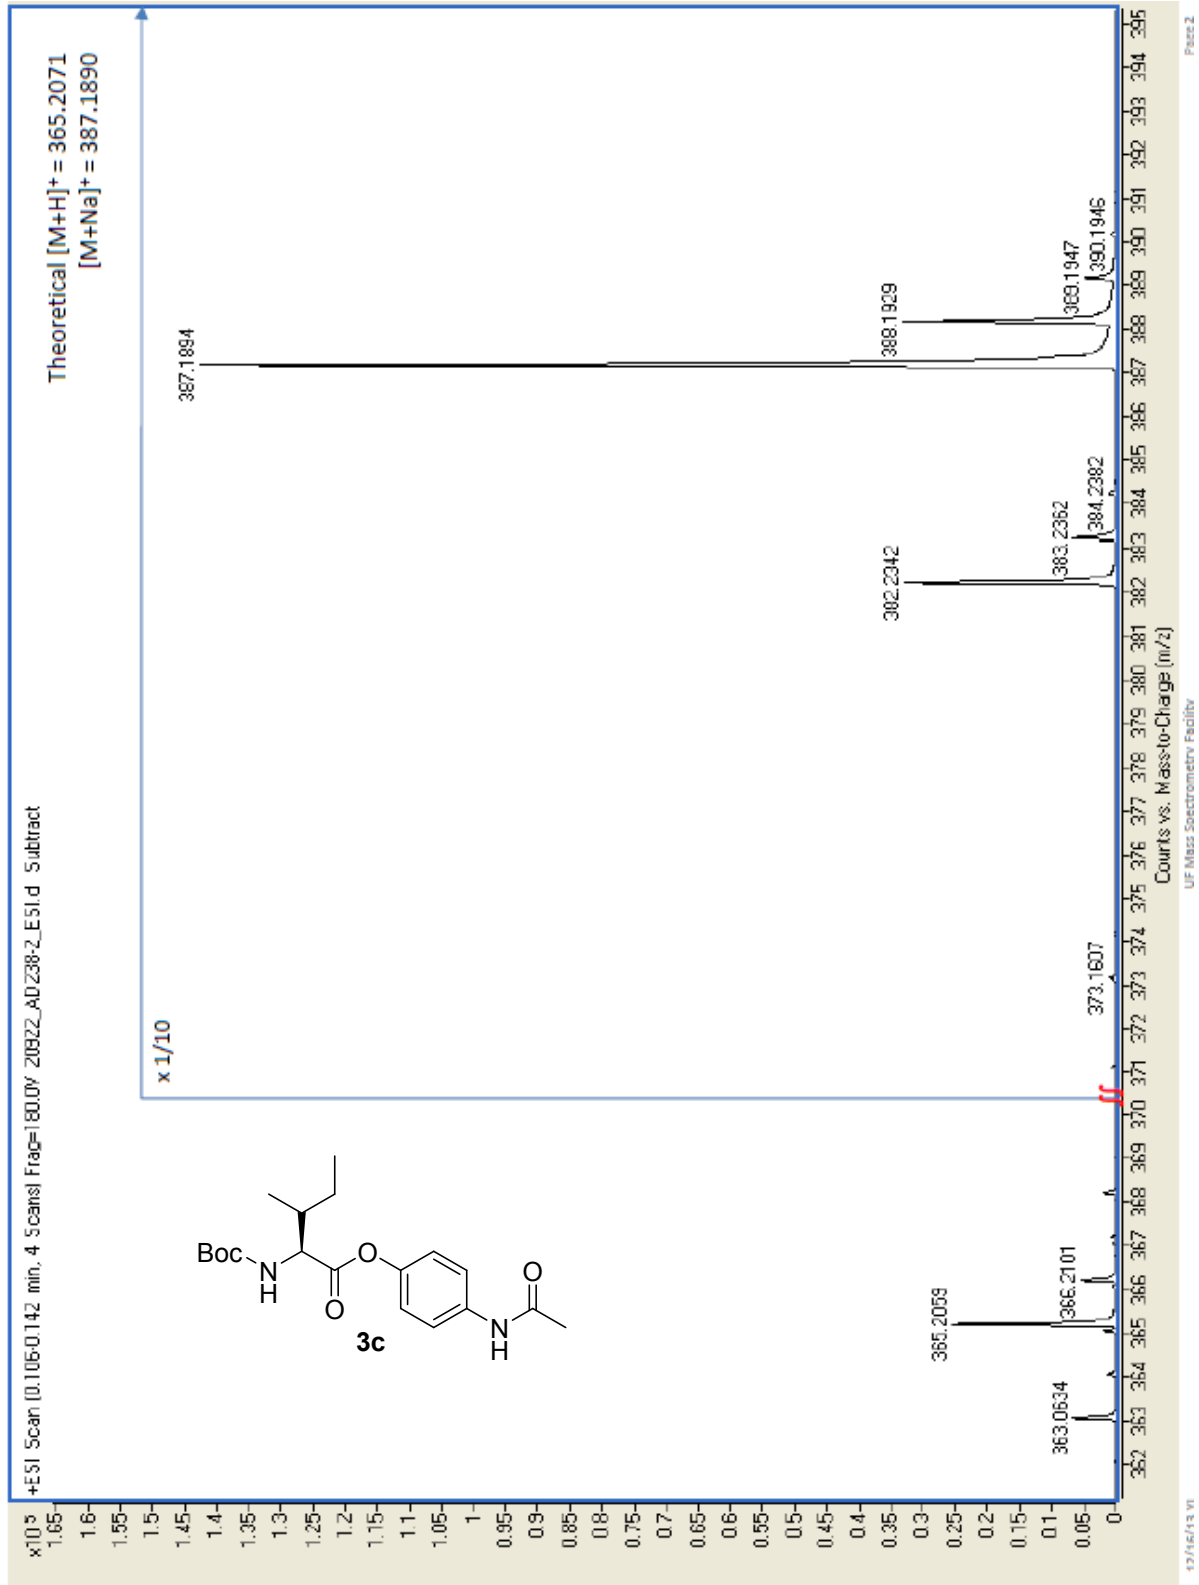

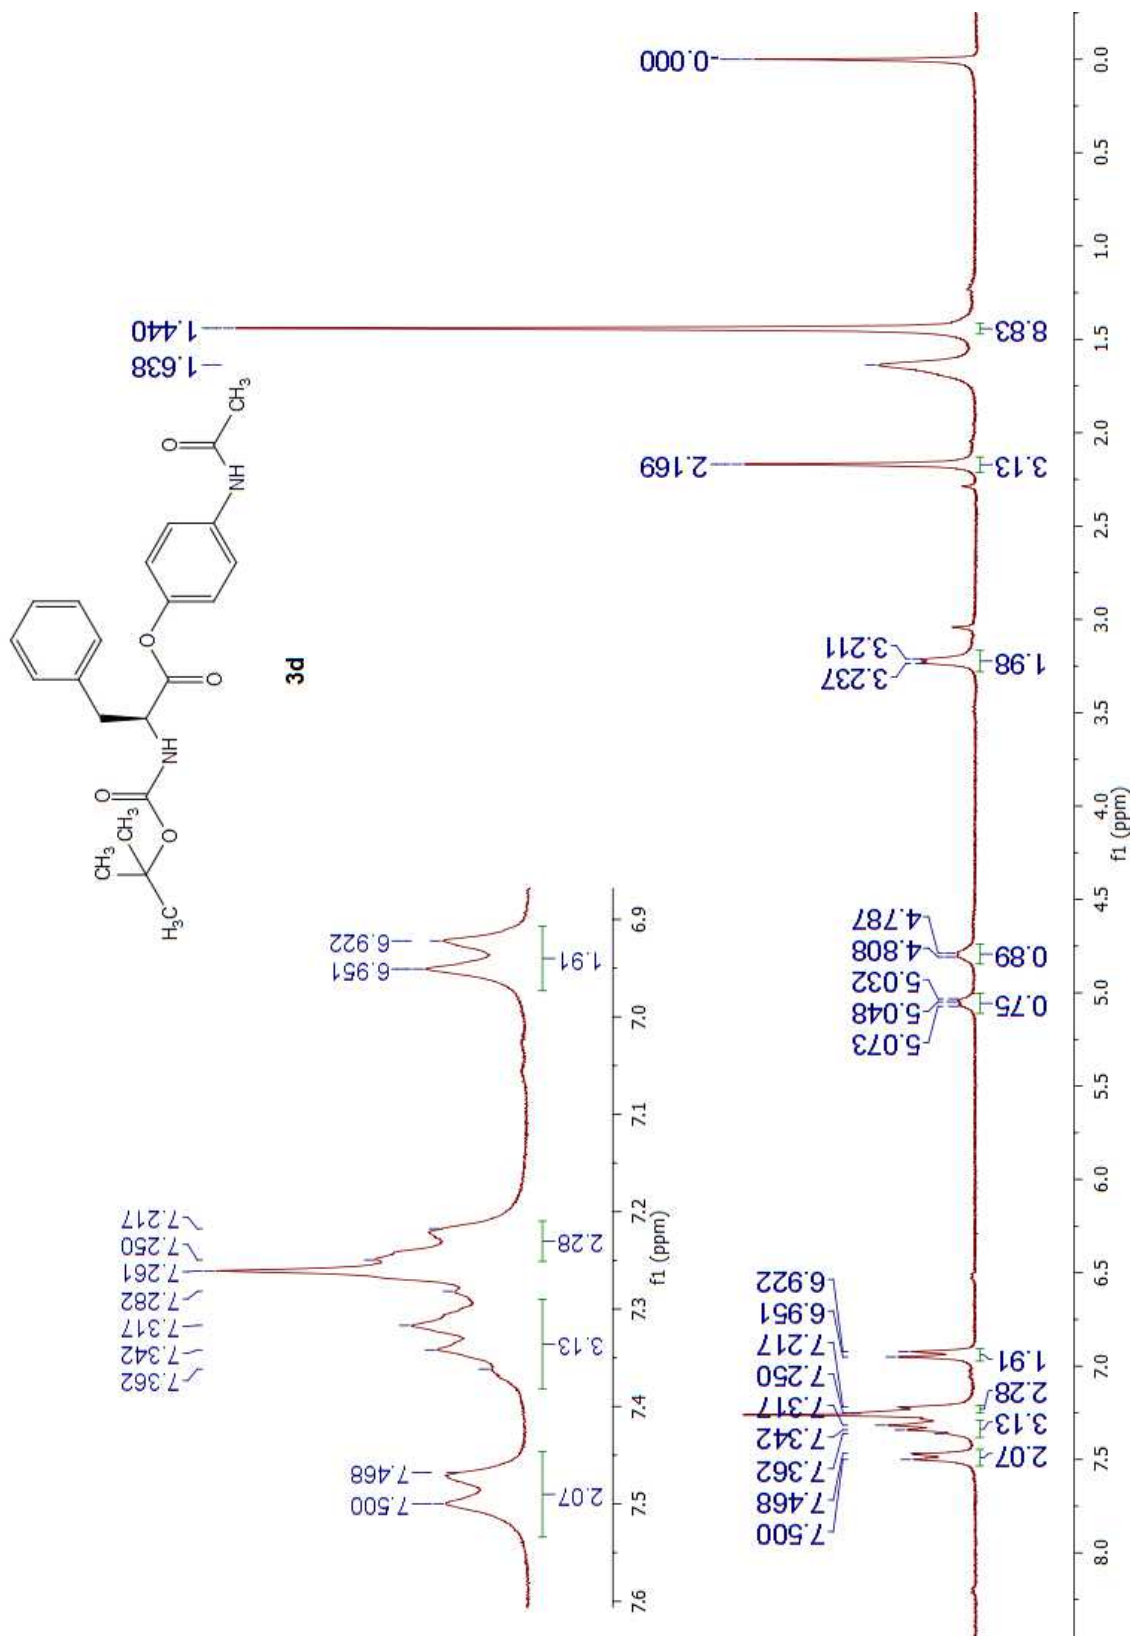

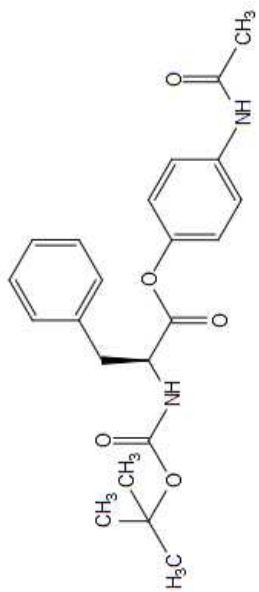

3d

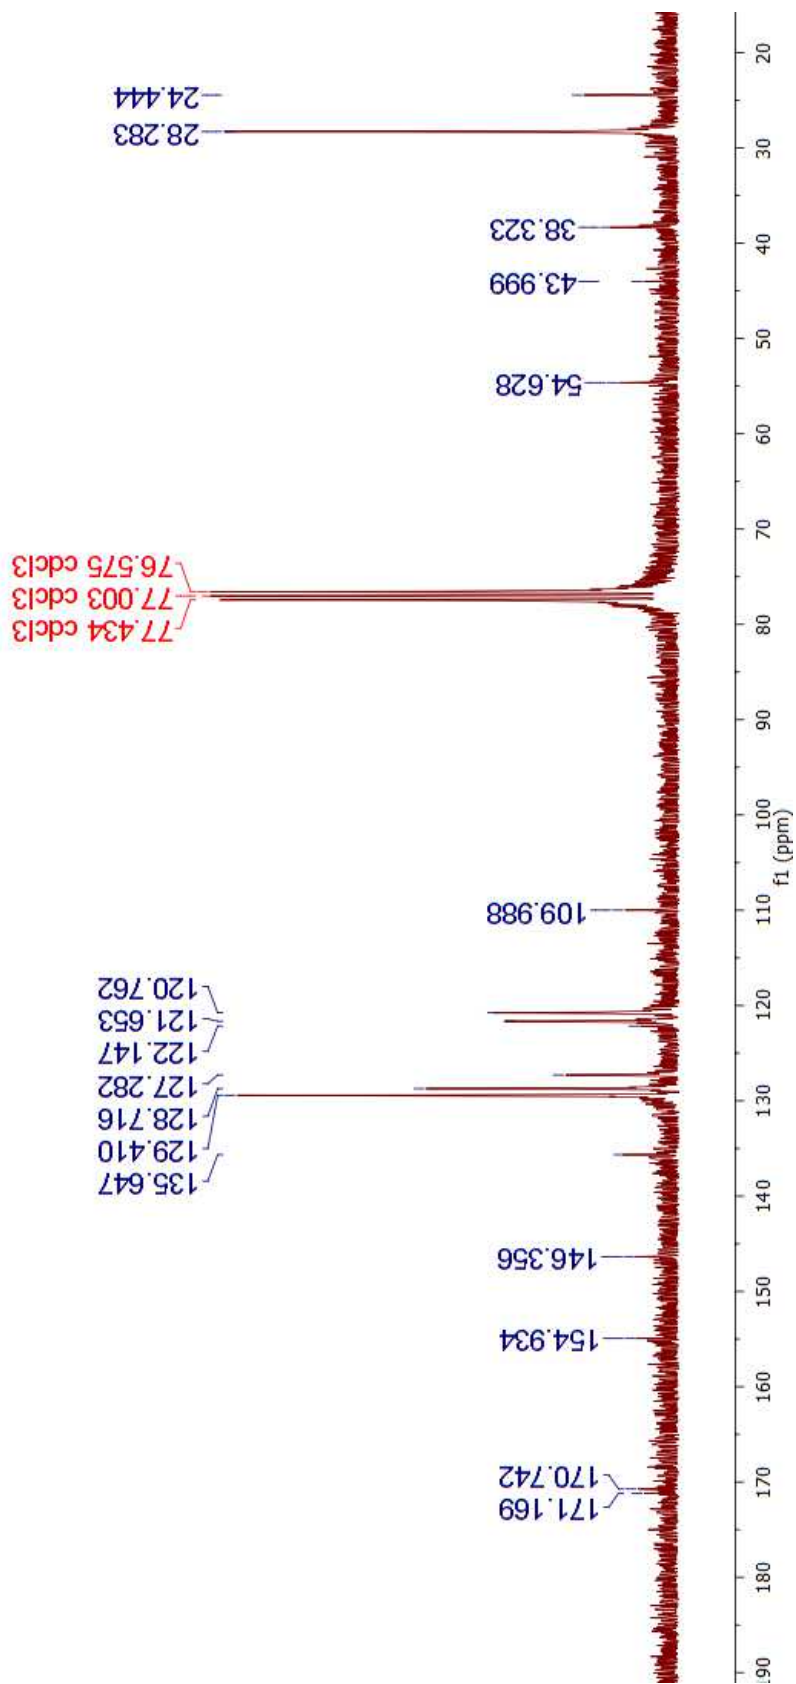

EAGER 200 Stripchart

Sample Ident. : 15 AD239      Filename : 282715  
 Analysed : 10-15-13 10:45:40      Printed : 10-15-2013 16:28:03

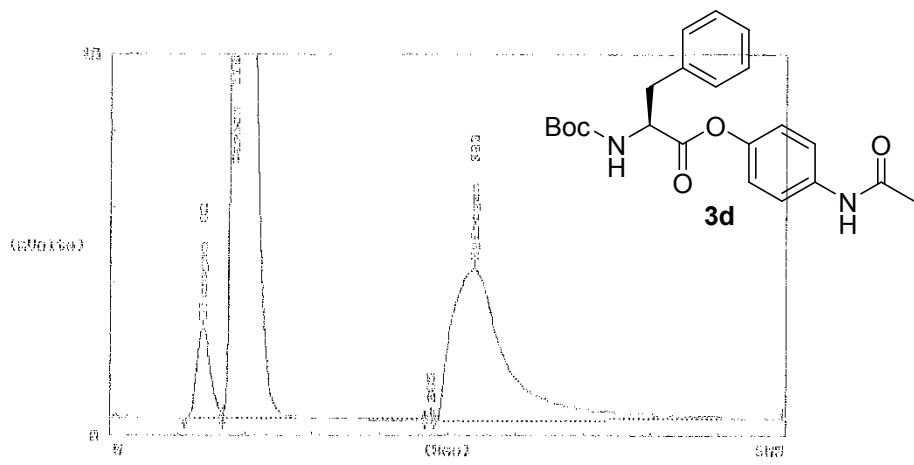

EAGER 200 Peak Integration Report

Instrument name : Instrument #1      Bline drift (fV): -1.7  
 Company Name : U of Florida      Operator Ident. : KOU  
 Analysed : 10-15-13 10:45:40      Printed : 10-15-2013 16:28:04  
 Sample Ident. : 15 AD239      Filename : 282715  
 Sample Weight : 2.106      Calc.method: using 'K. Factors'

| No. (#) | Type (#) | Start (Sec) | End (Sec) | Ret Time (Sec) | Height (fV) | Area (fV*Sec) | Area % (%) | Name     |
|---------|----------|-------------|-----------|----------------|-------------|---------------|------------|----------|
| 1       | FU       | 66          | 100       | 82             | 2351.7      | 31533         | 2.97       | Nitrogen |
| 2       | FU       | 100         | 280       | 110            | 53762.4     | 805720        | 75.95      | Carbon   |
| 3       | FU       | 280         | 288       | 285            | 1.9         | 15            | 0.00       |          |
| 4       | FU       | 288         | 598       | 323            | 3909.8      | 223568        | 21.07      | Hydrogen |
|         |          |             |           |                |             | 1060837       | 100.00     |          |

EAGER 200 Unk Report

Instrument name : Instrument #1      Bline drift (fV): -1.7  
 Company Name : U of Florida      Operator Ident. : KOU  
 Analysed : 10-15-13 10:45:40      Printed : 10-15-2013 16:28:04  
 Sample Ident. : 15 AD239      Filename : 282715  
 Sample Weight : 2.106      Calc.method: using 'K. Factors'

| Pk. (#) | Ret Time (Sec) | Area (fV*Sec) | Element % (%) | Area Ratio  | Name     |
|---------|----------------|---------------|---------------|-------------|----------|
| 1       | 82             | 31533         | 7.207         | .255518E+02 | Nitrogen |
| 2       | 110            | 805720        | 66.019        | .100000E+01 | Carbon   |
| 4       | 323            | 223568        | 6.980         | .360392E+01 | Hydrogen |

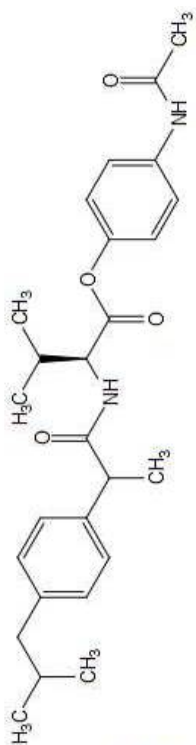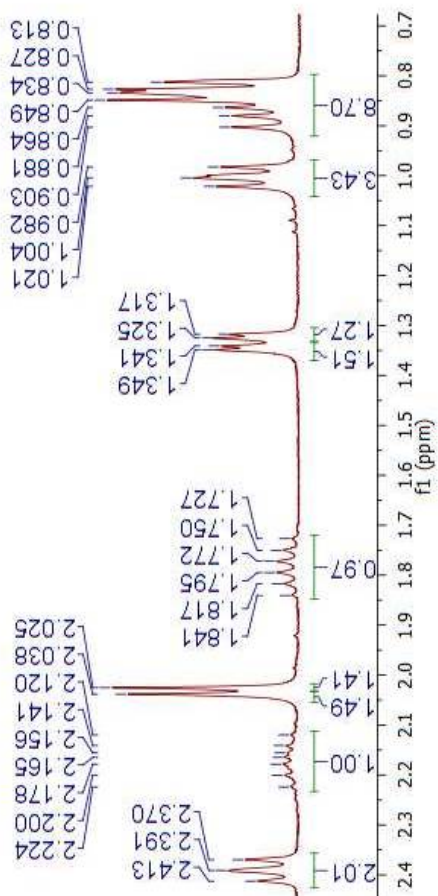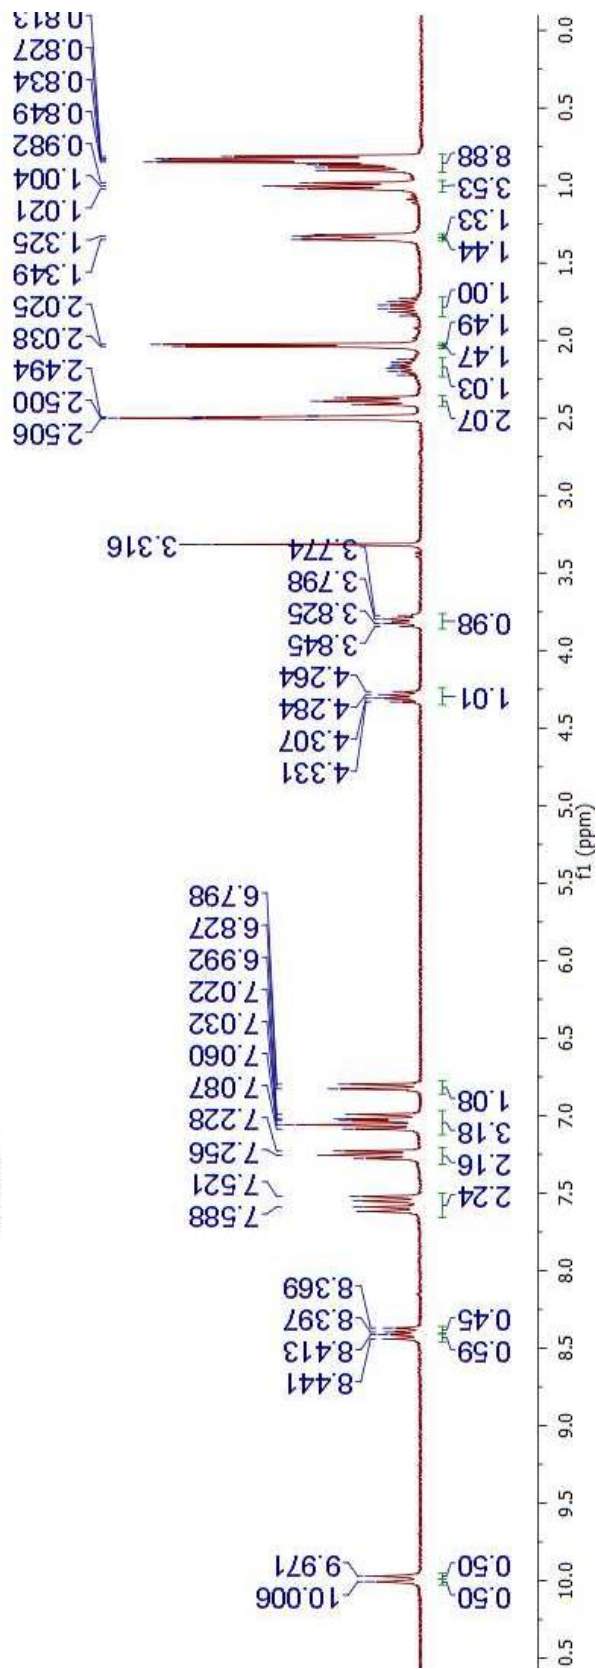

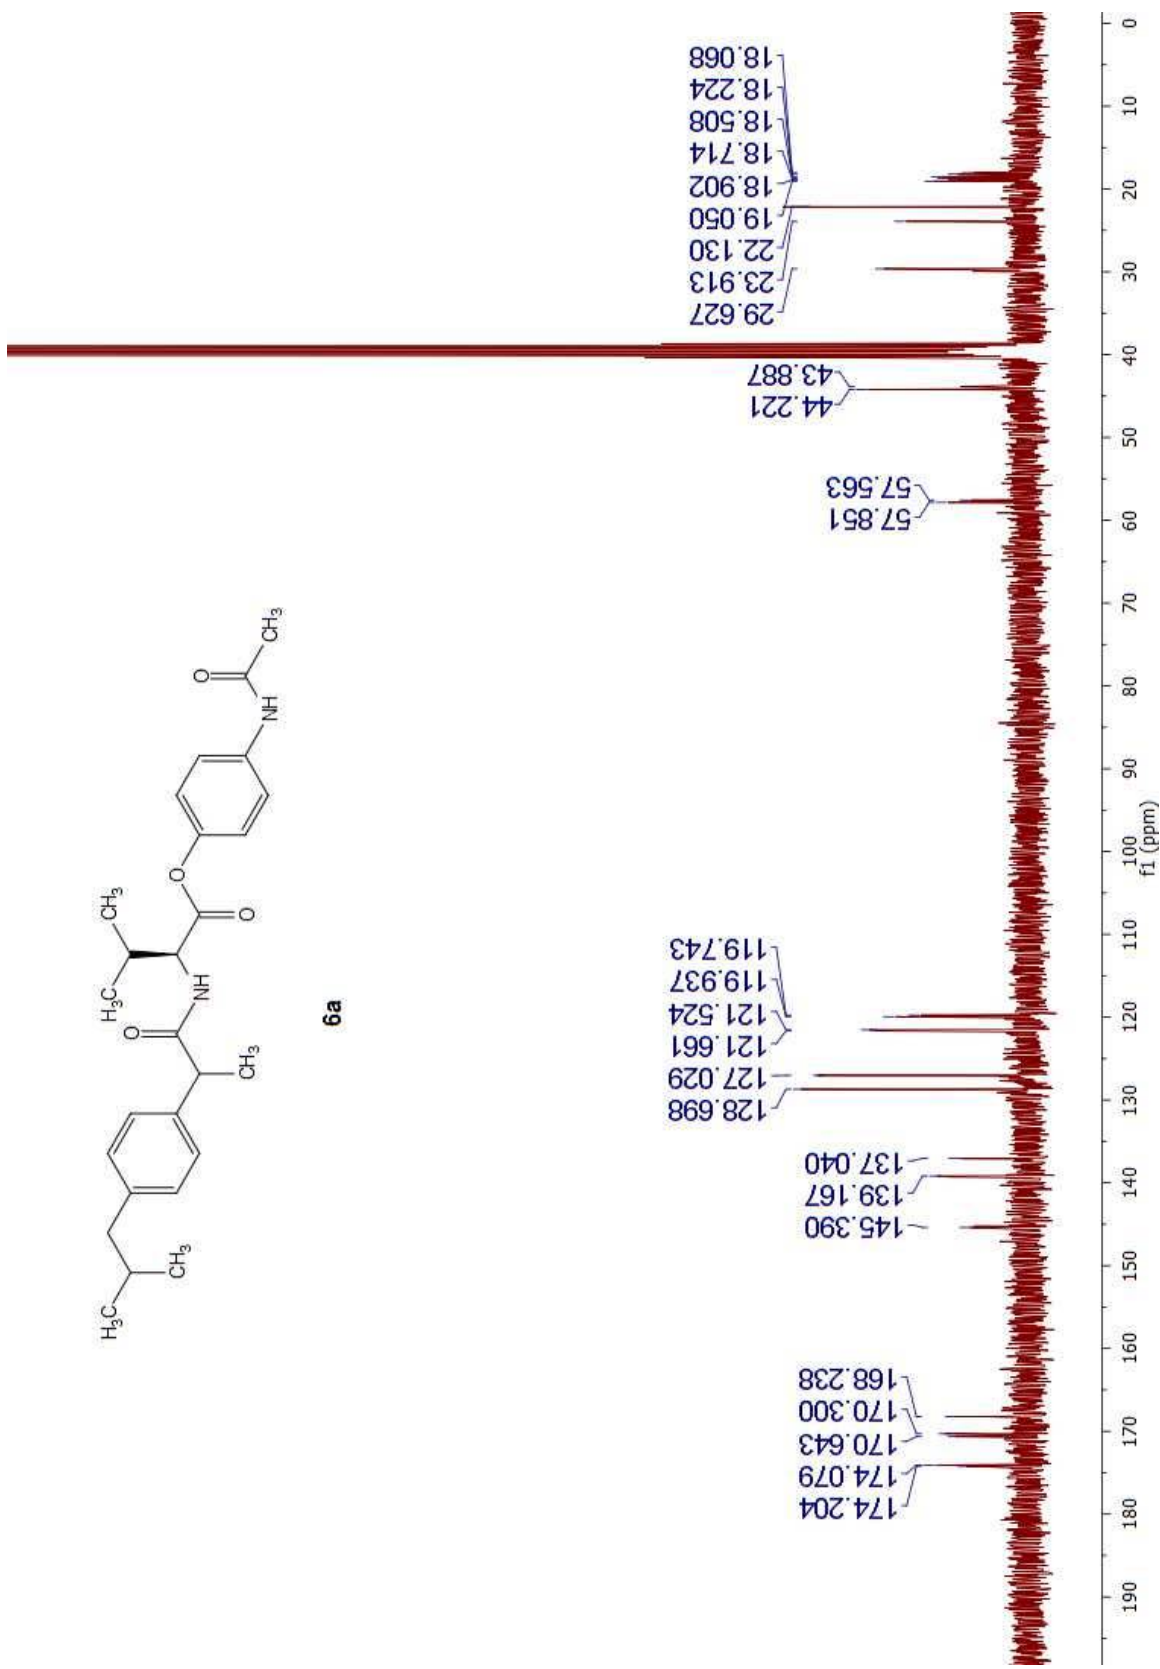

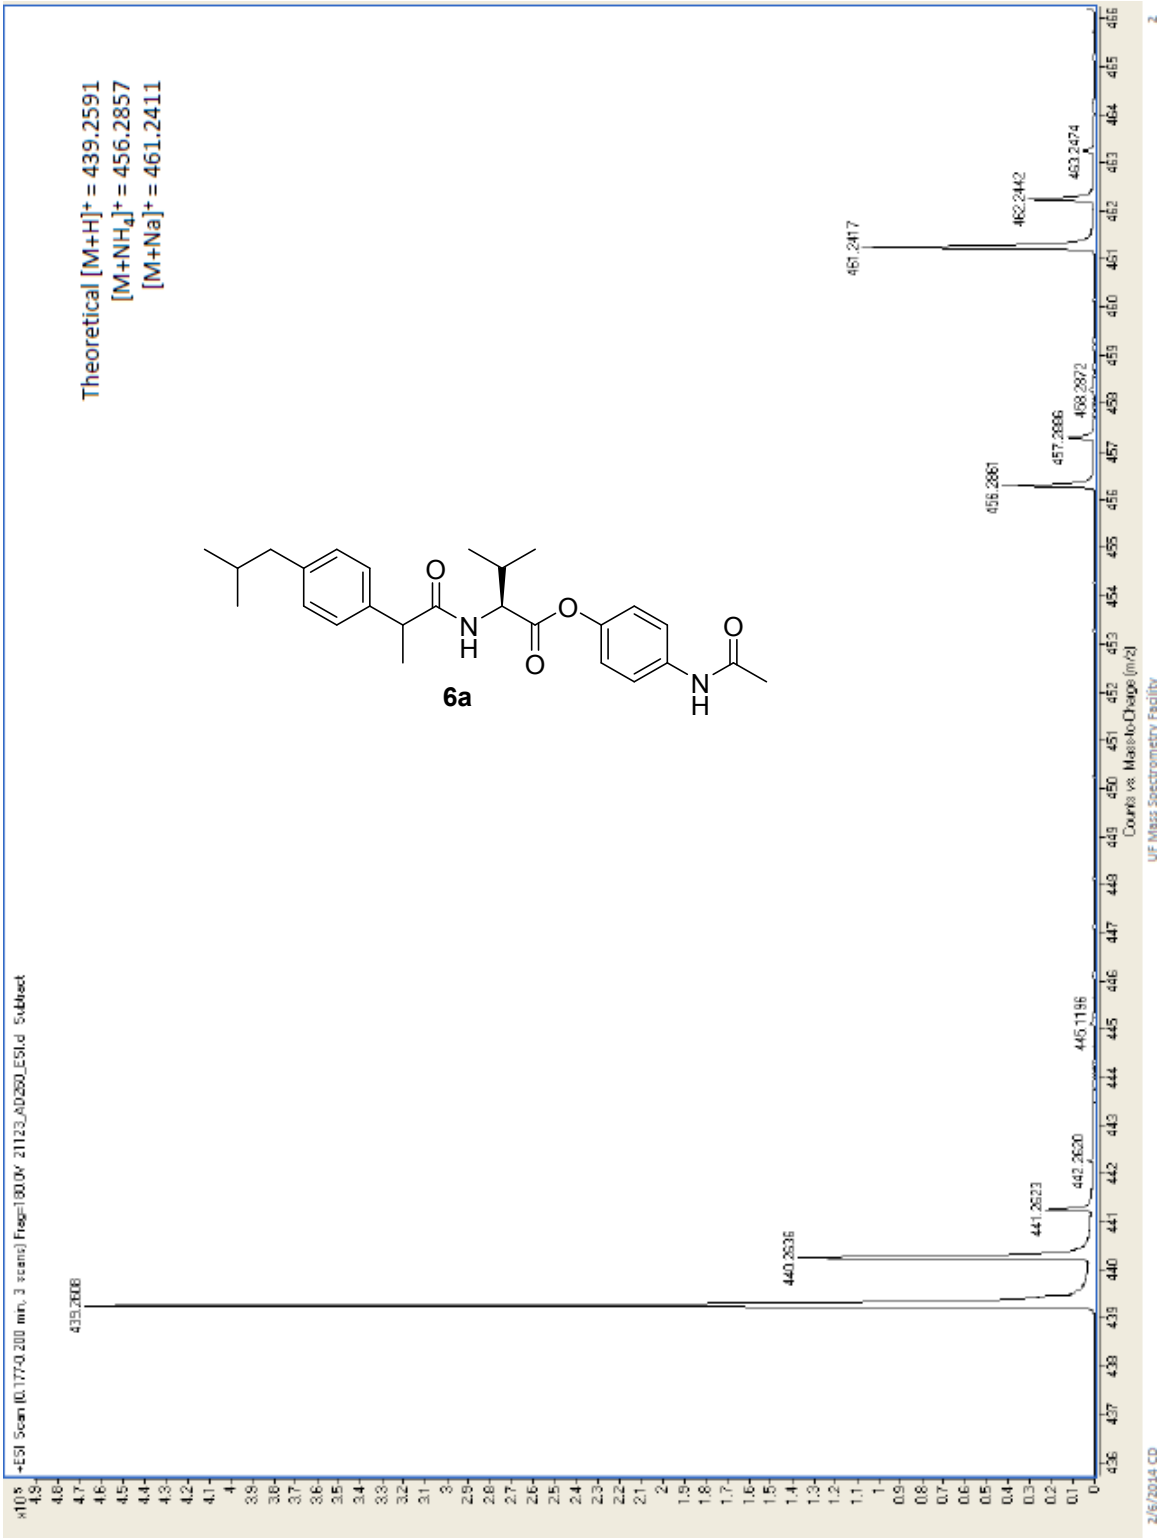



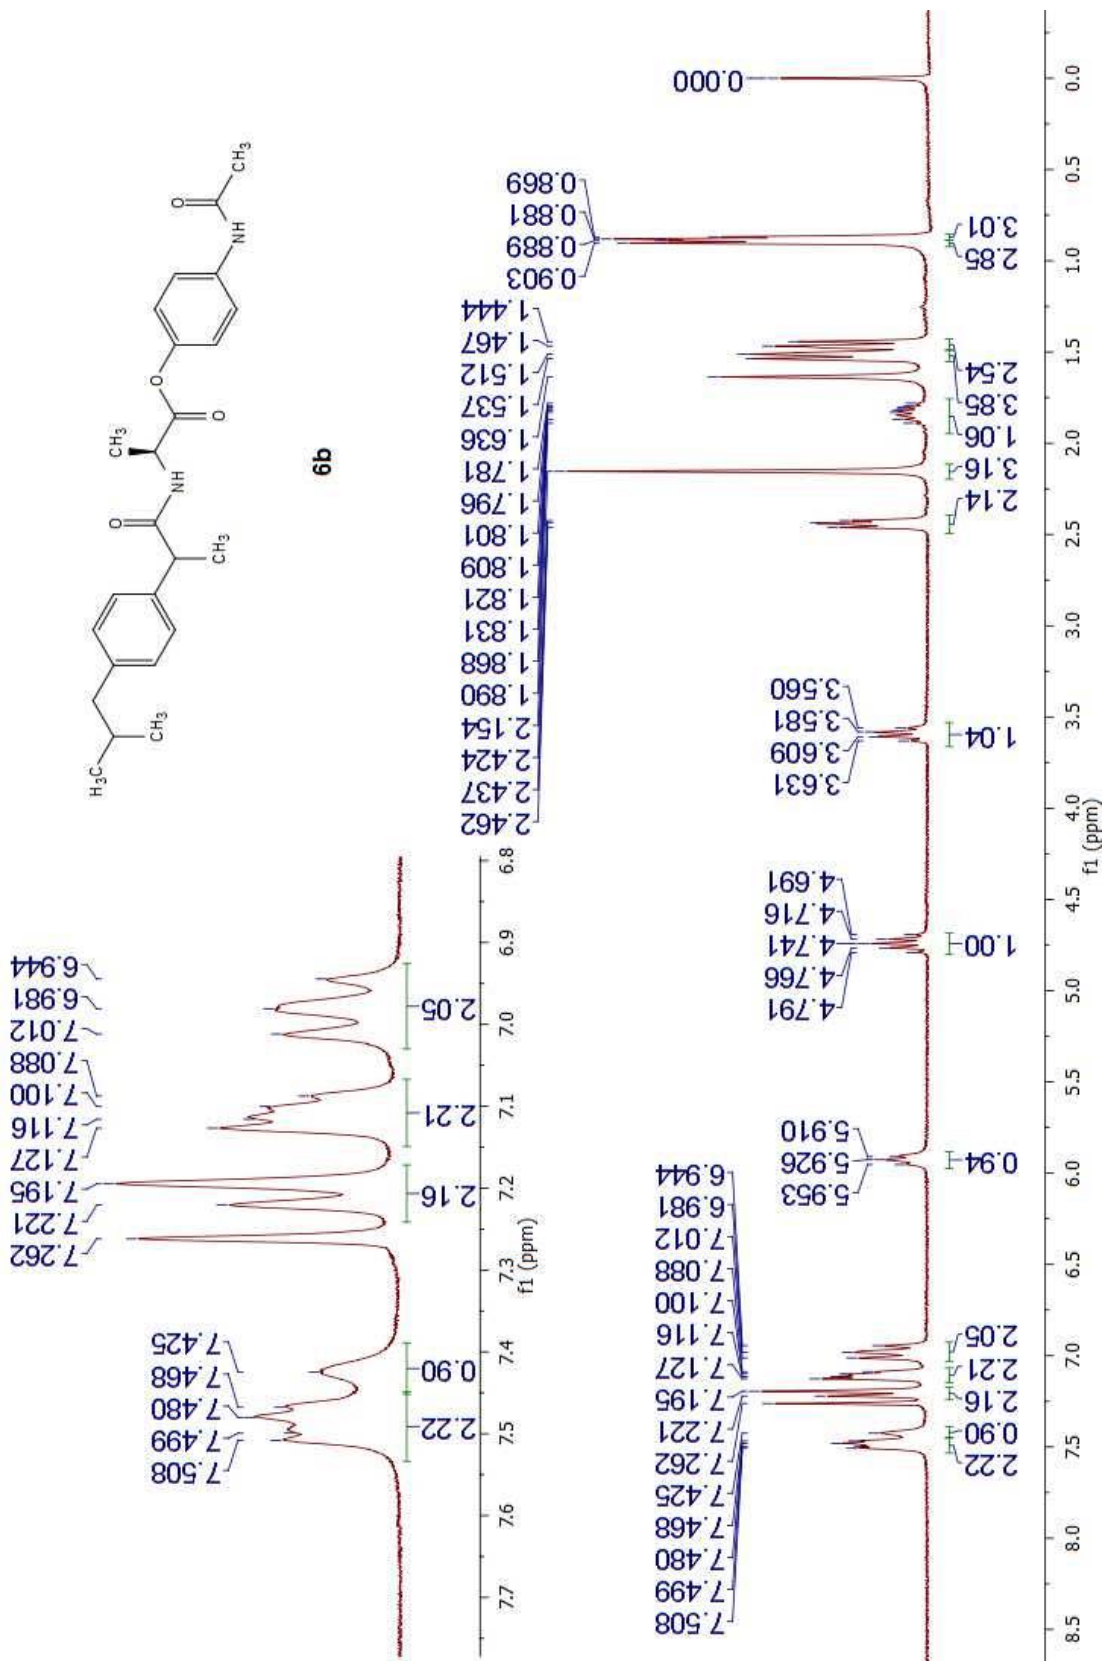

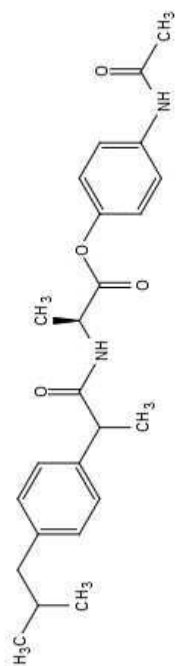

9b

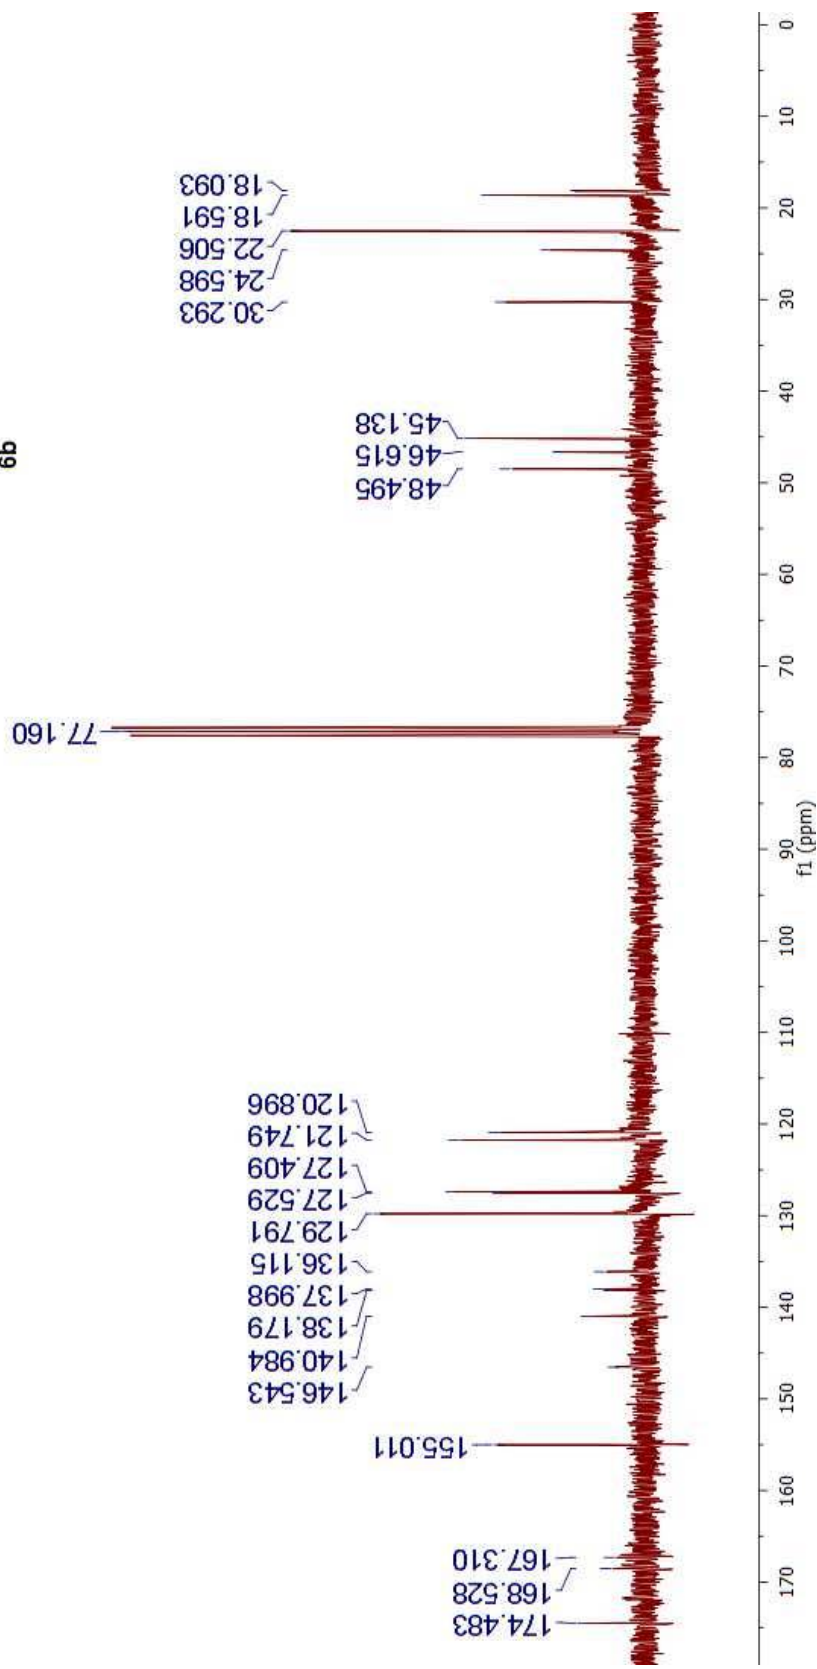

EAGER 200 Stripchart

Sample Ident. : 10 AD208      Filename : 282710  
 Analysed : 10-15-13 09:55:14      Printed : 10-15-2013 16:27:51

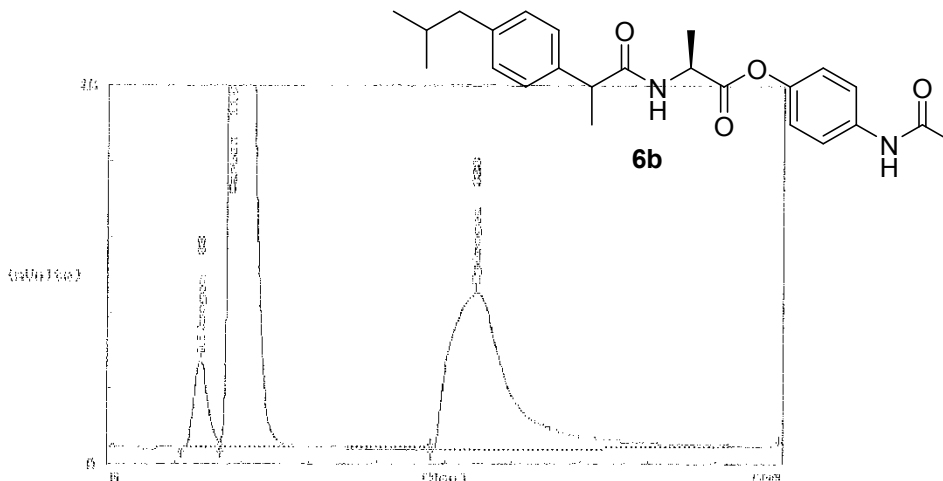

EAGER 200 Peak Integration Report

Instrument name : Instrument #1      Bline drift (fV): 24.1  
 Company Name : U of Florida      Operator Ident. : KOU  
 Analysed : 10-15-13 09:55:14      Printed : 10-15-2013 16:27:51  
 Sample Ident. : 10 AD208      Filename : 282710  
 Sample Weight : 2.152      Calc.method: using 'K. Factors'

| No. (#) | Type (#) | Start (Sec) | End (Sec) | Ret Time (Sec) | Height (fV) | Area (fV*Sec) | Area % (%) | Name     |
|---------|----------|-------------|-----------|----------------|-------------|---------------|------------|----------|
| 1       | FU       | 66          | 101       | 83             | 2305.3      | 30846         | 2.67       | Nitrogen |
| 2       | FU       | 101         | 288       | 110            | 57586.8     | 871445        | 75.56      | Carbon   |
| 3       | RS       | 288         | 597       | 328            | 4067.0      | 251098        | 217.77     | Hydrogen |

1153389 100.00

EAGER 200 Unk Report

Instrument name : Instrument #1      Bline drift (fV): 24.1  
 Company Name : U of Florida      Operator Ident. : KOU  
 Analysed : 10-15-13 09:55:14      Printed : 10-15-2013 16:27:51  
 Sample Ident. : 10 AD208      Filename : 282710  
 Sample Weight : 2.152      Calc.method: using 'K. Factors'

| Pk. (#) | Ret Time (Sec) | Area (fV*Sec) | Element % (%) | Area Ratio  | Name     |
|---------|----------------|---------------|---------------|-------------|----------|
| 1       | 83             | 30846         | 6.899         | .282517E+02 | Nitrogen |
| 2       | 110            | 871445        | 69.879        | .100000E+01 | Carbon   |
| 3       | 328            | 251098        | 7.671         | .347054E+01 | Hydrogen |

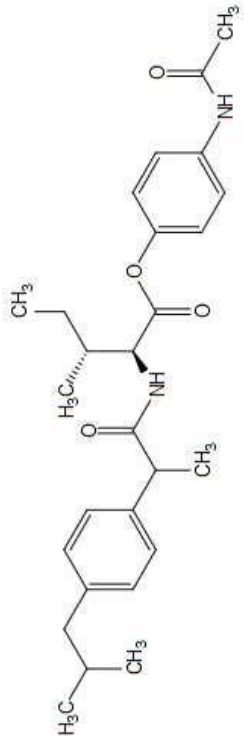

**6c**

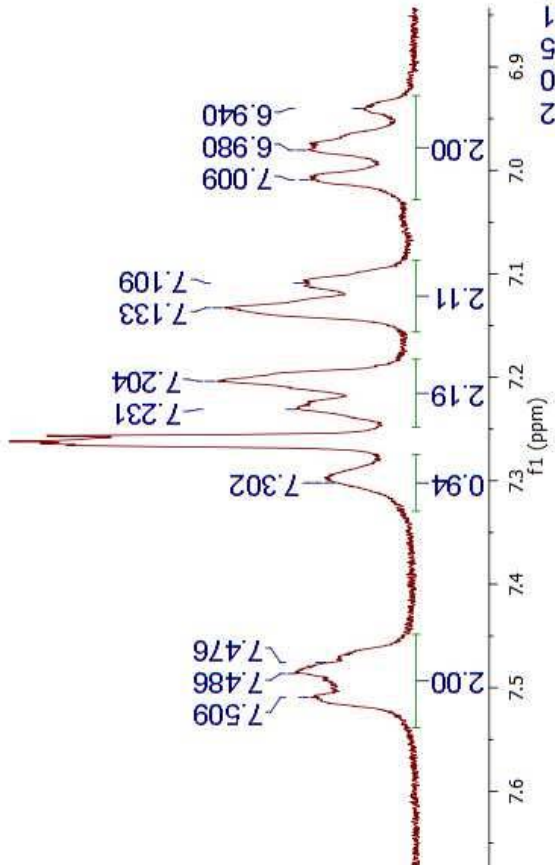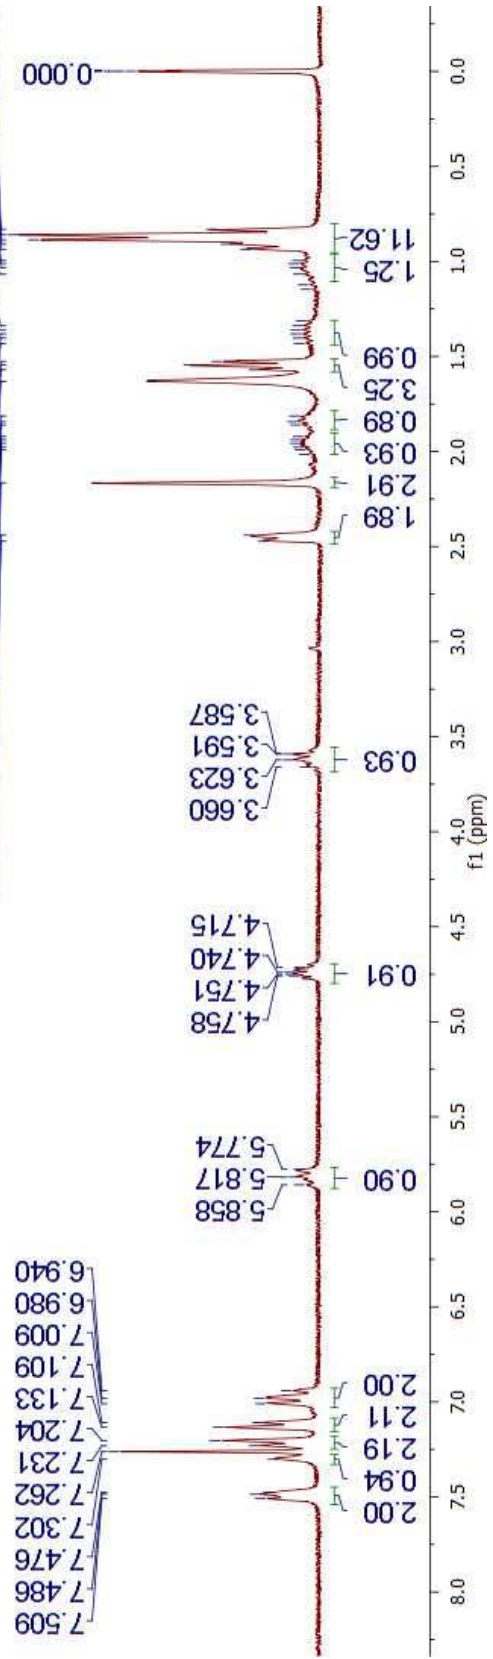

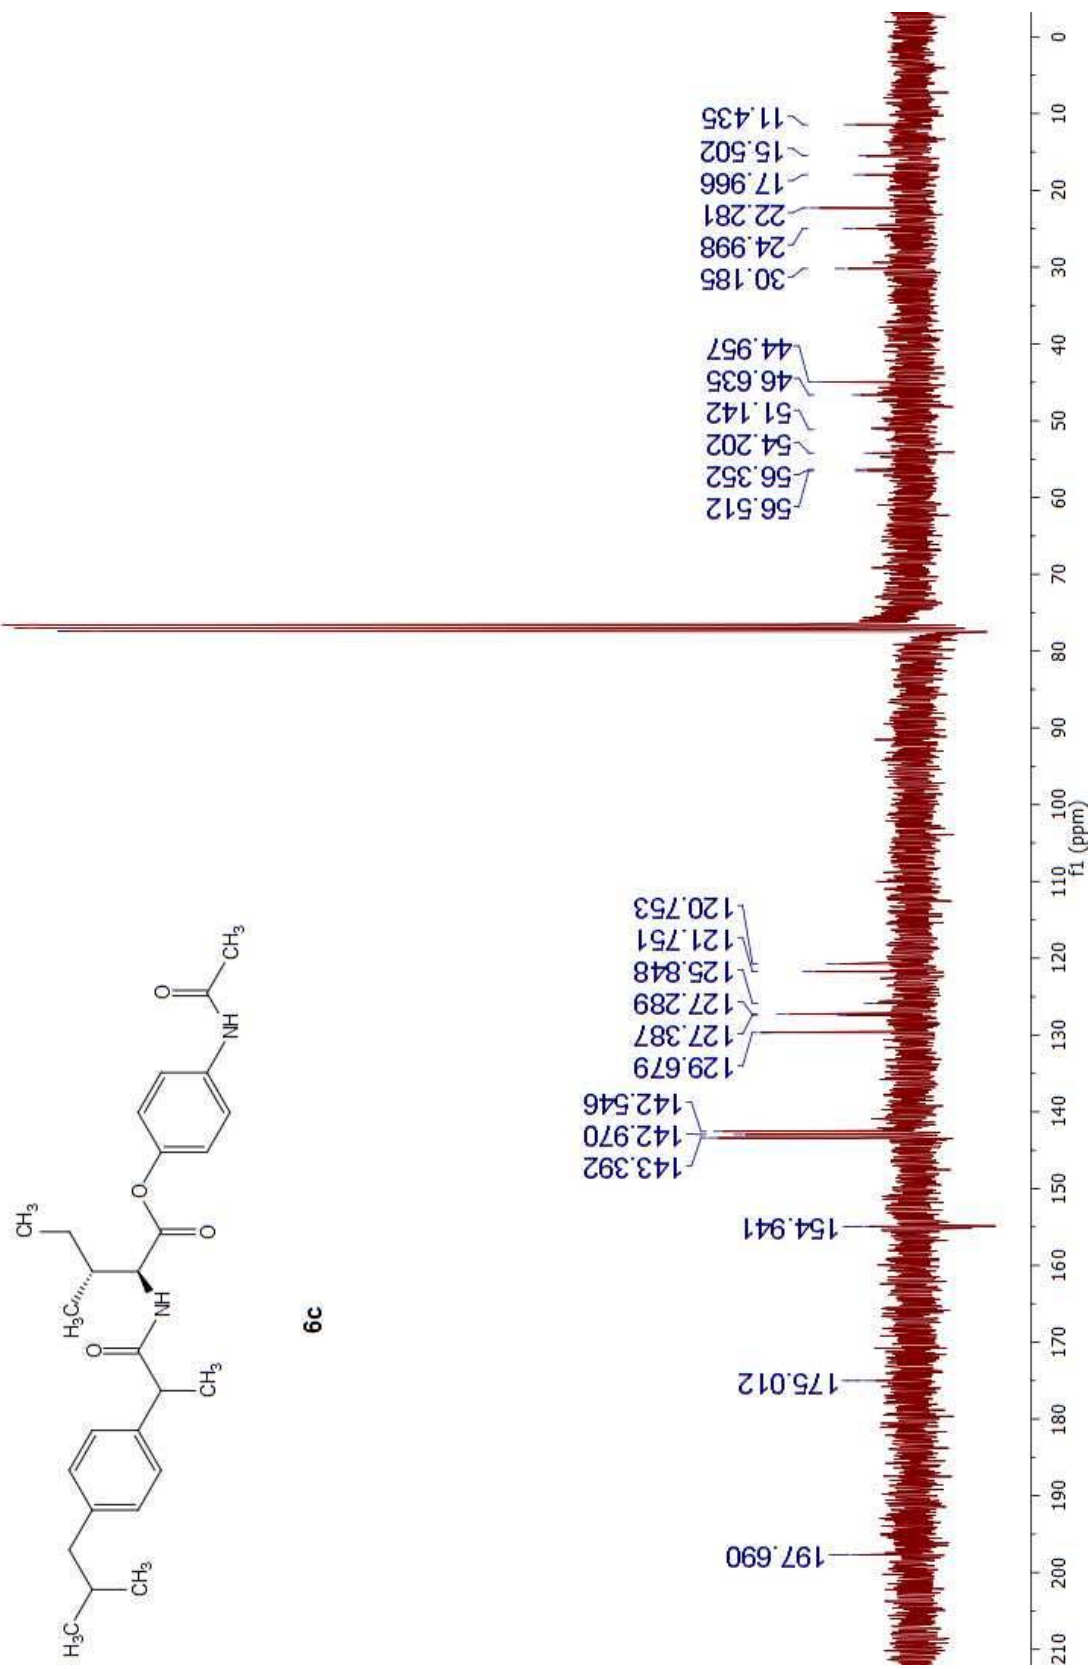

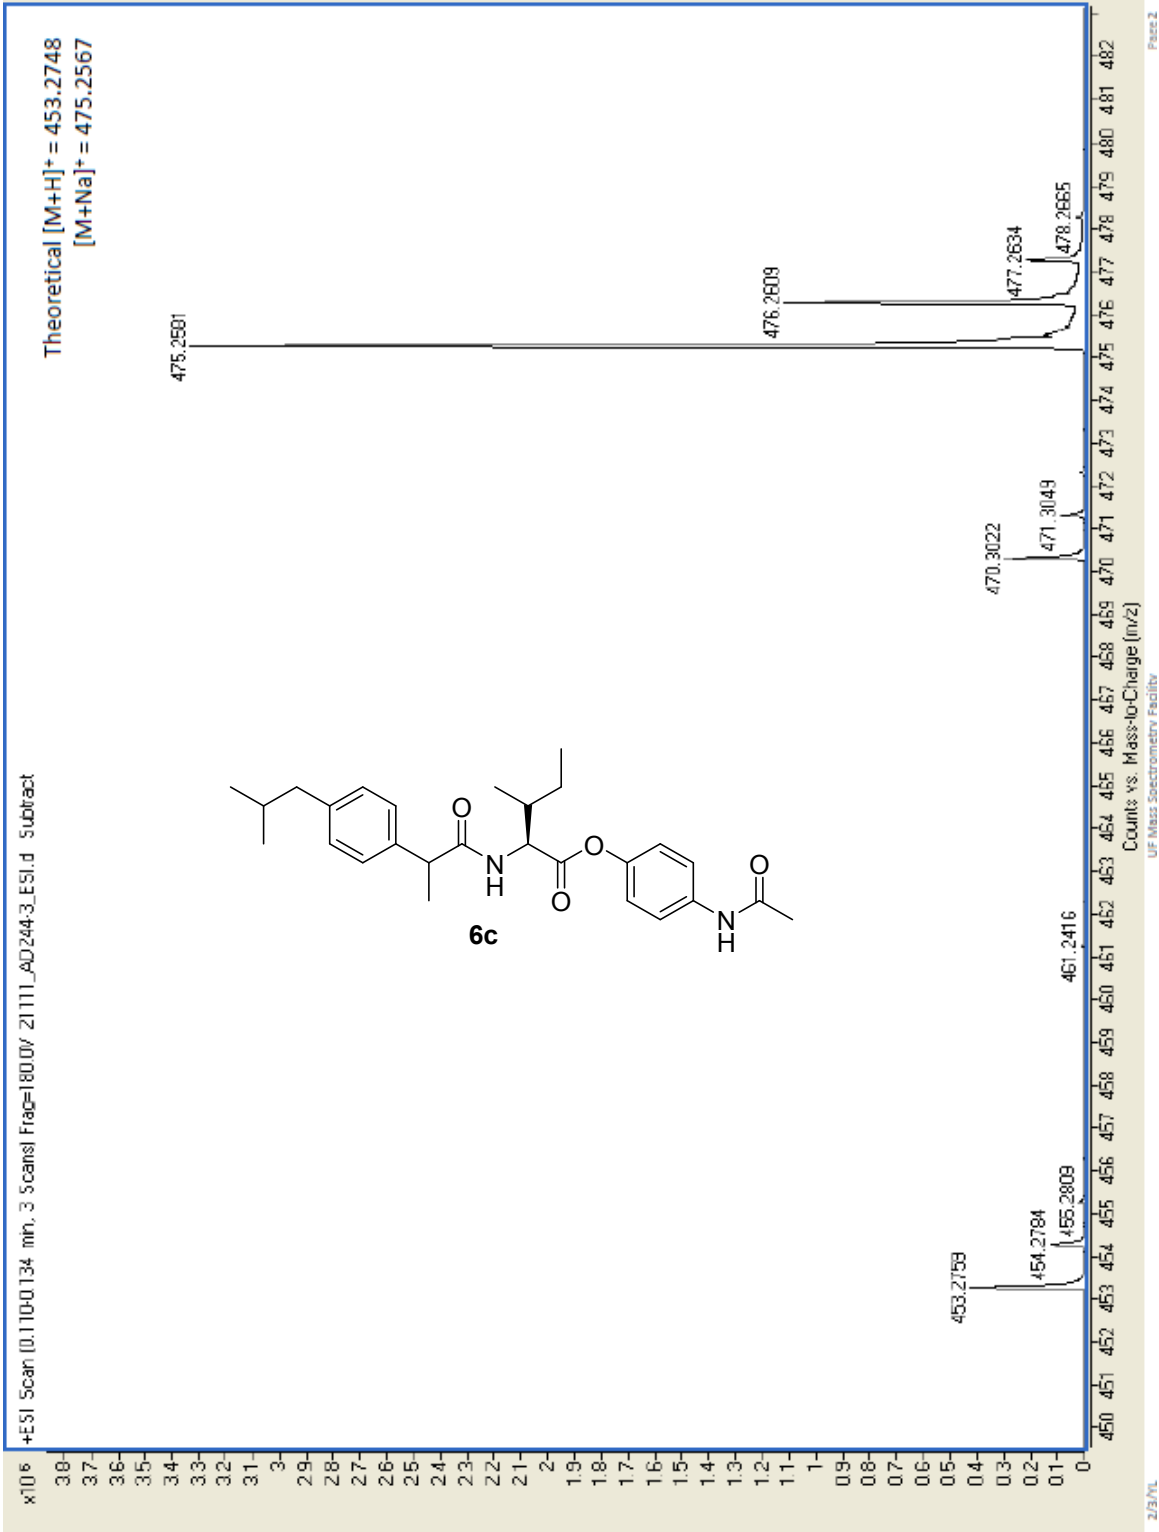

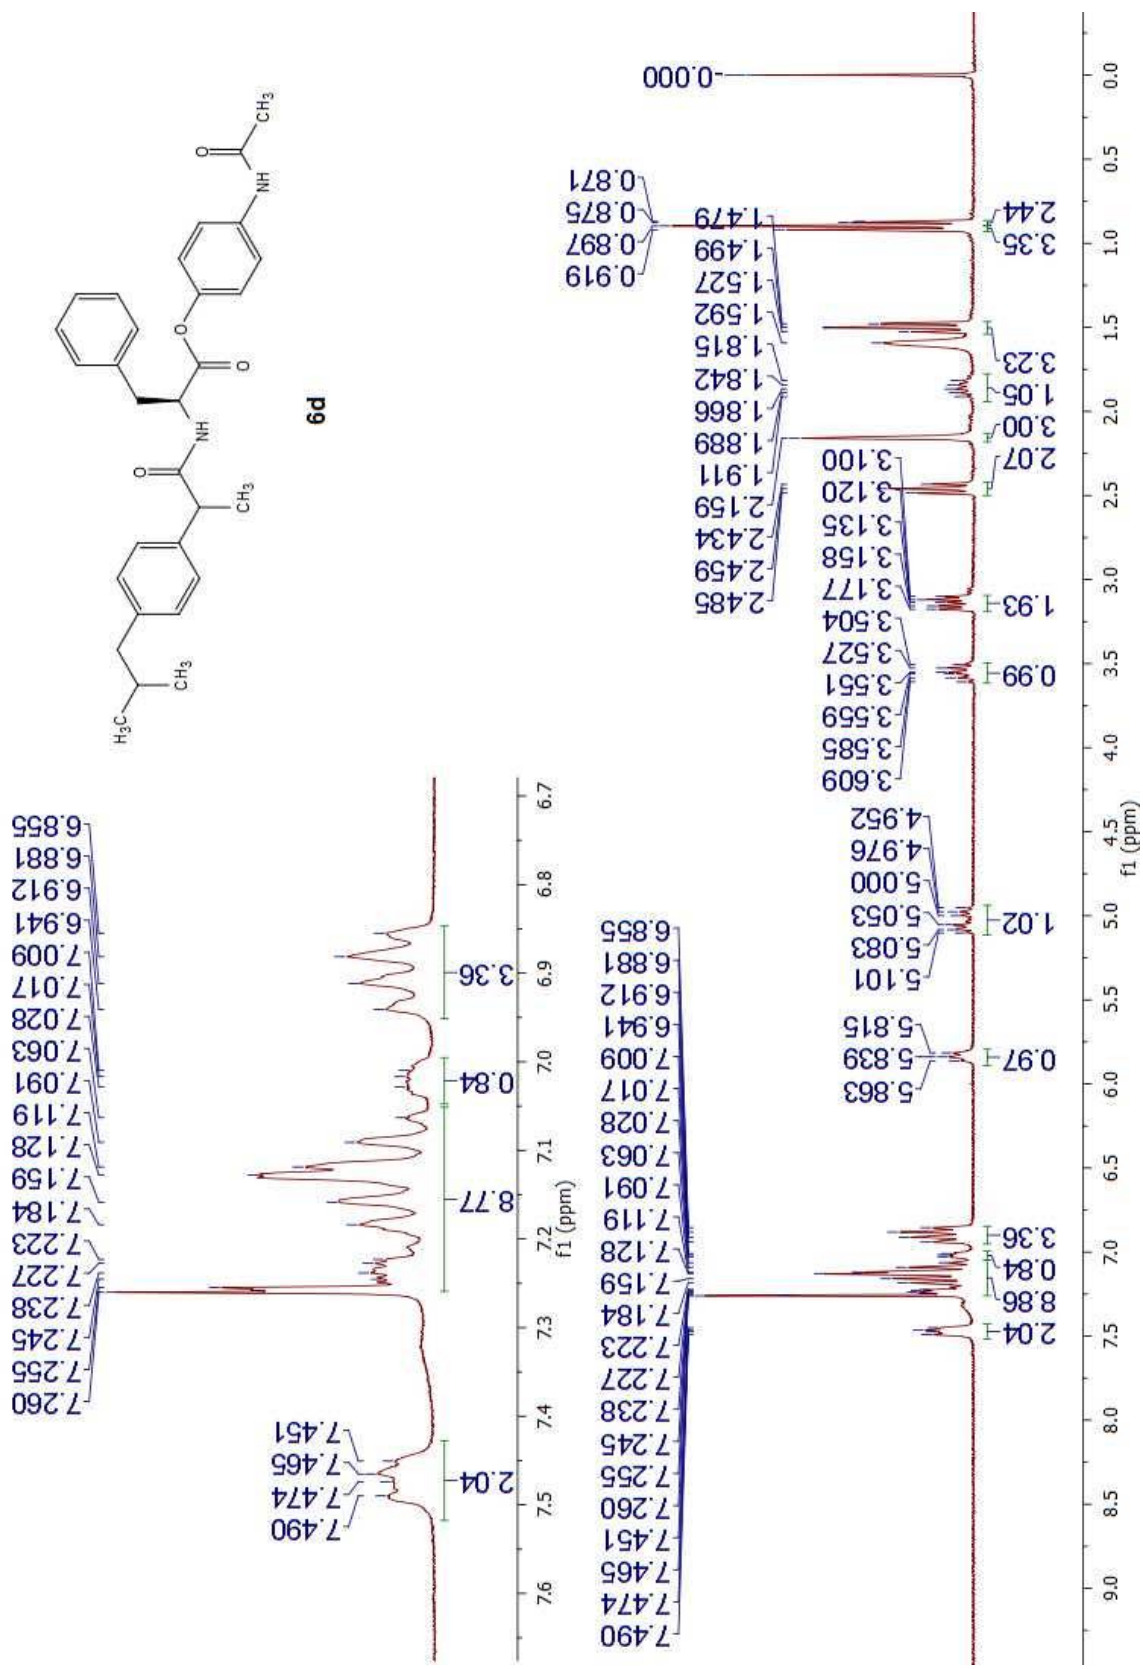

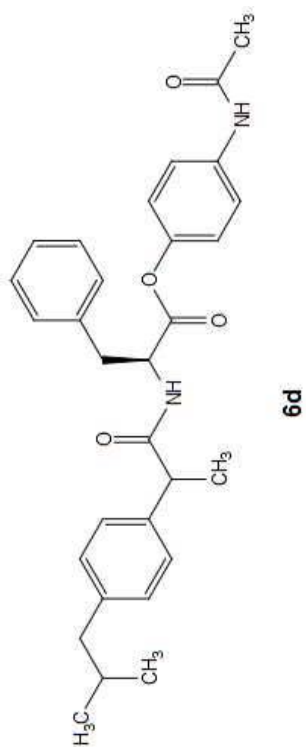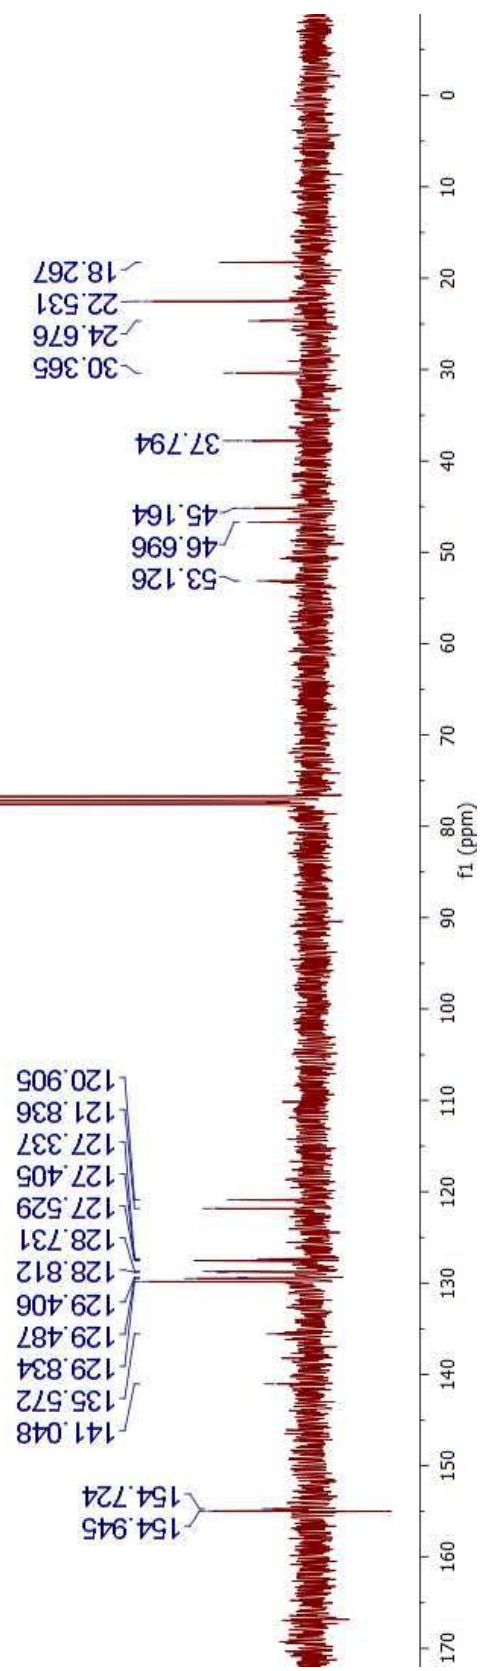



EAGER 200 Stripchart

Sample Ident. : 10 AD220                      Filename : 282610  
 Analysed : 10-10-13 10:15:33              Printed : 10-10-2013 12:21:59

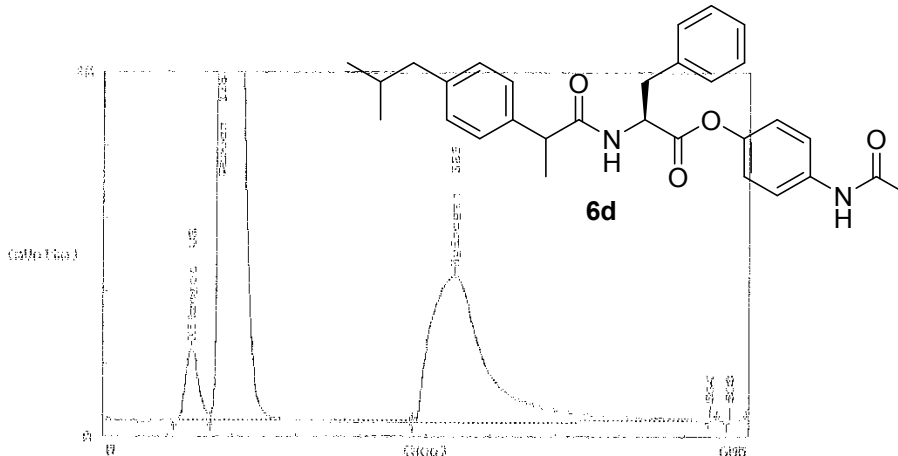

EAGER 200 Peak Integration Report

Instrument name : Instrument #1                      Bline drift (fV): 22.8  
 Company Name : U of Florida                      Operator Ident. : KOU  
 Analysed : 10-10-13 10:15:33                      Printed : 10-10-2013 12:22:00  
 Sample Ident. : 10 AD220                      Filename : 282610  
 Sample Weight : 2.173                      Calc.method: using 'K. Factors'

| No. (#) | Type | Start (Sec) | End (Sec) | Ret Time (Sec) | Height (fV) | Area (fV*Sec) | Area % (%) | Name     |
|---------|------|-------------|-----------|----------------|-------------|---------------|------------|----------|
| 1       | FU   | 66          | 100       | 82             | 1972.4      | 26249         | 2.20       | Nitrogen |
| 2       | FU   | 100         | 288       | 109            | 61016.1     | 924536        | 77.66      | Carbon   |
| 3       | TL   | 288         | 598       | 326            | 3974.5      | 239705        | 20.13      | Hydrogen |
| 4       | CR   | 562         | 571       | 564            | 1.6         | 11            | 0.00       |          |
| 5       | CR   | 580         | 598       | 583            | 1.9         | 21            | 0.00       |          |

1190520 100.00

EAGER 200 Unk Report

Instrument name : Instrument #1                      Bline drift (fV): 22.8  
 Company Name : U of Florida                      Operator Ident. : KOU  
 Analysed : 10-10-13 10:15:33                      Printed : 10-10-2013 12:22:00  
 Sample Ident. : 10 AD220                      Filename : 282610  
 Sample Weight : 2.173                      Calc.method: using 'K. Factors'

| Pk. (#) | Ret Time (Sec) | Area (fV*Sec) | Element % (%) | Area Ratio | Name     |
|---------|----------------|---------------|---------------|------------|----------|
| 1       | 82             | 26249         | 5.824         | 352219E+02 | Nitrogen |
| 2       | 109            | 924536        | 73.749        | 100000E+01 | Carbon   |
| 3       | 326            | 239705        | 7.184         | 335698E+01 | Hydrogen |

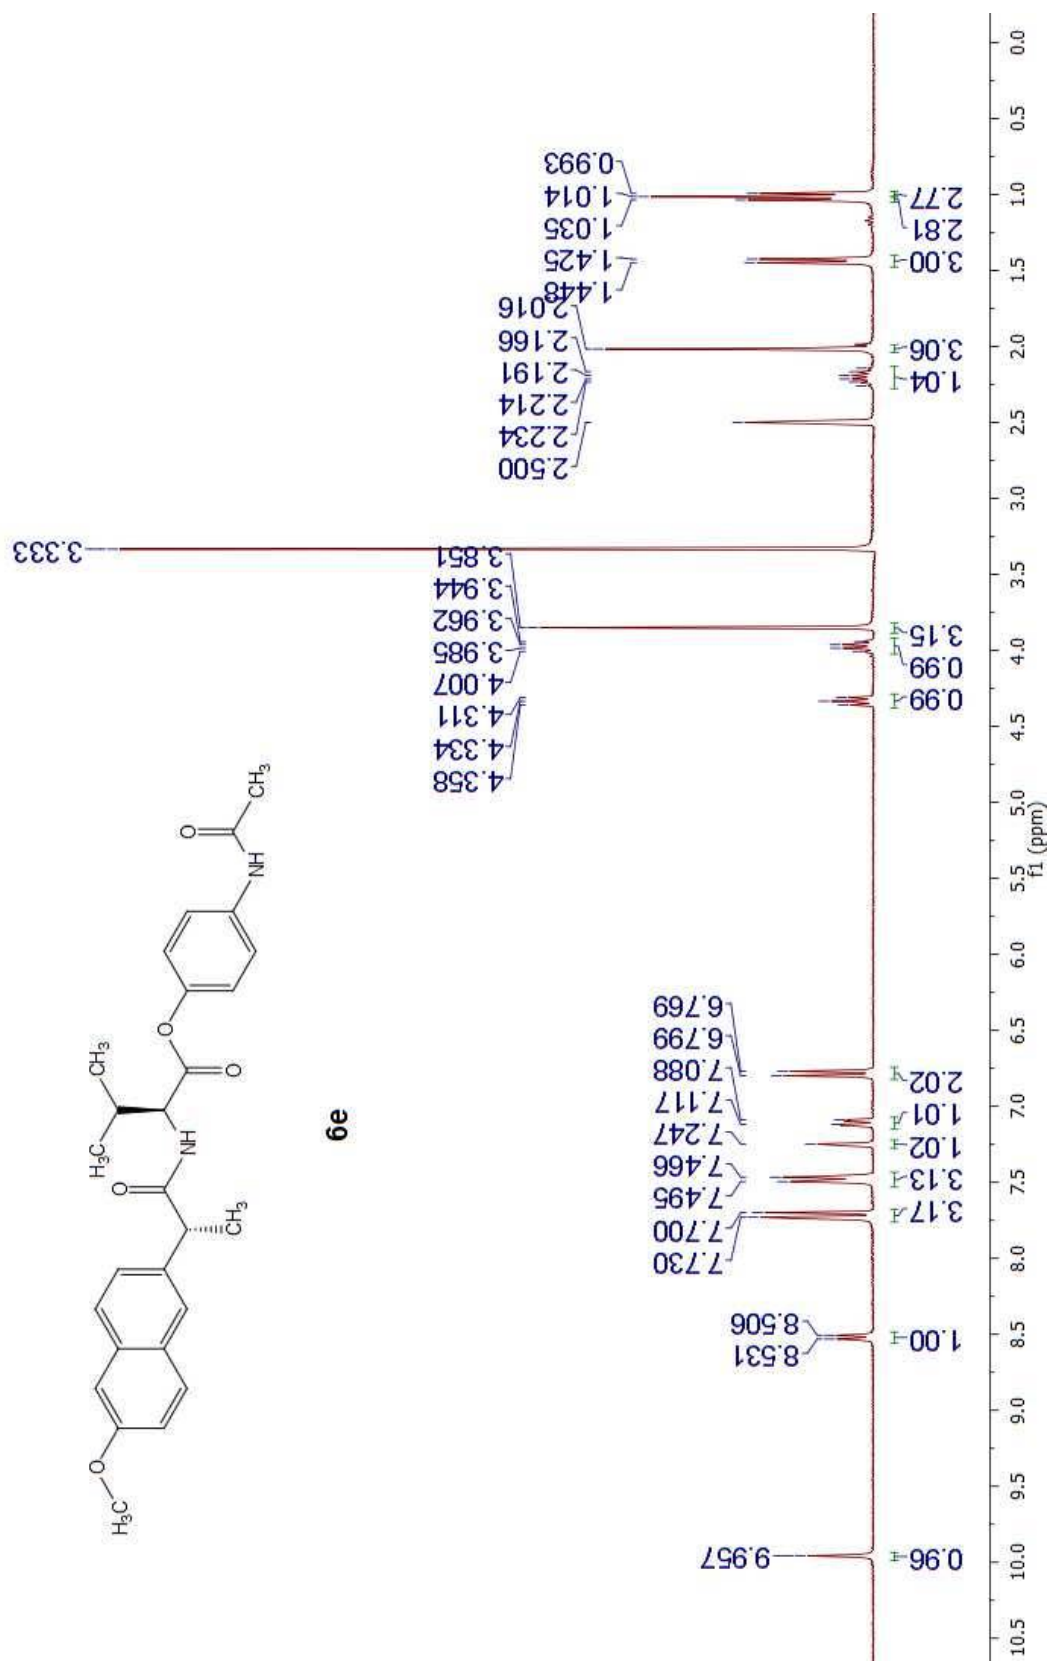

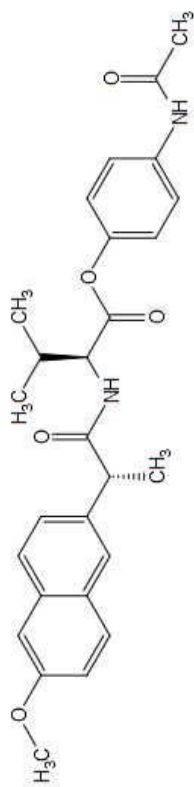

**6e**

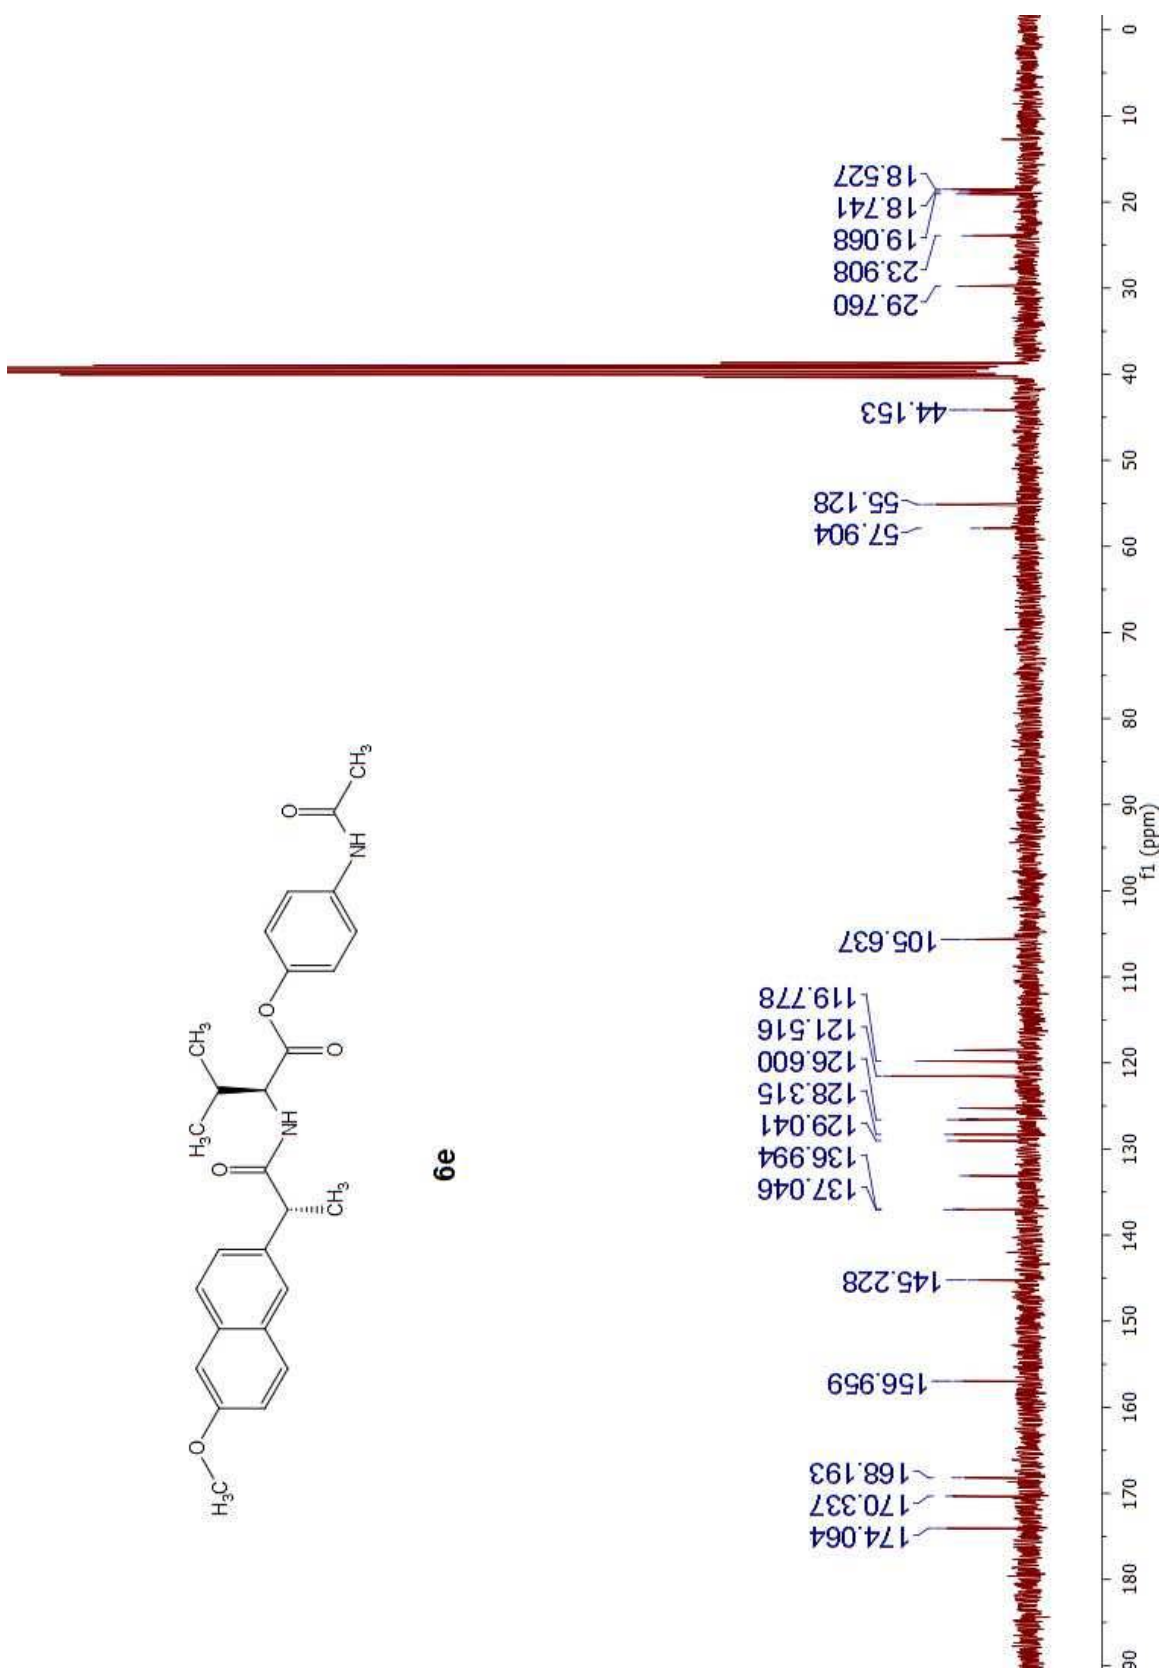

EAGER 200 Stripchart

Sample Ident. : 15 AD261      Filename : 283315  
 Analysed : 11-13-13 11:39:31      Printed : 11-13-2013 11:49:32

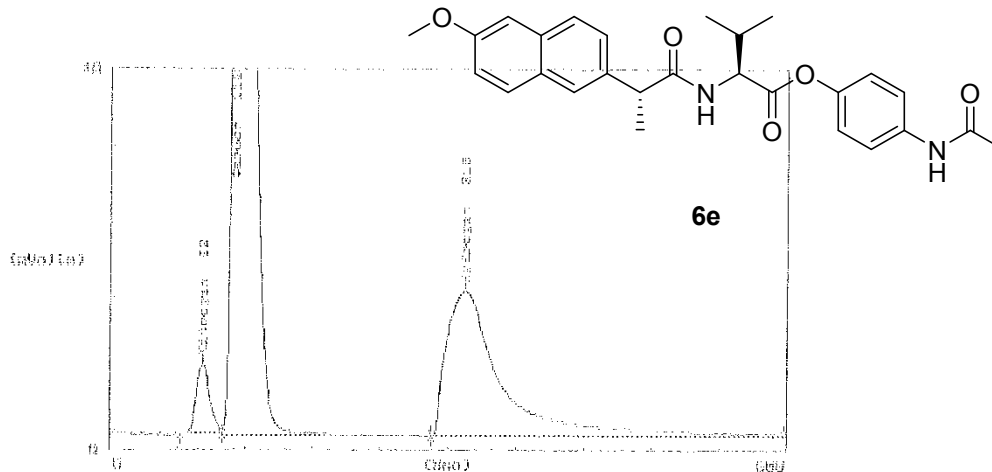

EAGER 200 Peak Integration Report

Instrument name : Instrument #1      Bline drift (fV): 11.8  
 Company Name : U of Florida      Operator Ident. : KOU  
 Analysed : 11-13-13 11:39:31      Printed : 11-13-2013 11:49:33  
 Sample Ident. : 15 AD261      Filename : 283315  
 Sample Weight : 1.97      Calc.method: using 'K. Factors'

| No. (#) | Type (#) | Start (Sec) | End (Sec) | Ret Time (Sec) | Height (fV) | Area (fV*Sec) | Area % (%) | Name     |
|---------|----------|-------------|-----------|----------------|-------------|---------------|------------|----------|
| 1       | FU       | 63          | 100       | 62             | 1804.8      | 24235         | 2.38       | Nitrosan |
| 2       | FU       | 100         | 285       | 110            | 52736.7     | 788864        | 77.54      | Carbon   |
| 3       | RS       | 285         | 598       | 315            | 3734.5      | 204246        | 20.08      | Hydrogen |
|         |          |             |           |                |             | 1017345       | 100.00     |          |

EAGER 200 Unk Report

Instrument name : Instrument #1      Bline drift (fV): 11.8  
 Company Name : U of Florida      Operator Ident. : KOU  
 Analysed : 11-13-13 11:39:31      Printed : 11-13-2013 11:49:33  
 Sample Ident. : 15 AD261      Filename : 283315  
 Sample Weight : 1.97      Calc.method: using 'K. Factors'

| Pk. (#) | Ret Time (Sec) | Area (fV*Sec) | Element % (%) | Area Ratio  | Name     |
|---------|----------------|---------------|---------------|-------------|----------|
| 1       | 62             | 24235         | 5.970         | .325512E+02 | Nitrosan |
| 2       | 110            | 788864        | 70.139        | .100000E+01 | Carbon   |
| 3       | 315            | 204246        | 6.864         | .386232E+01 | Hydrogen |

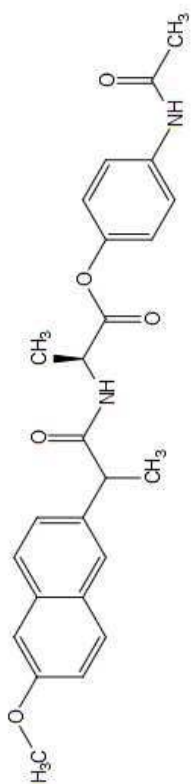

19

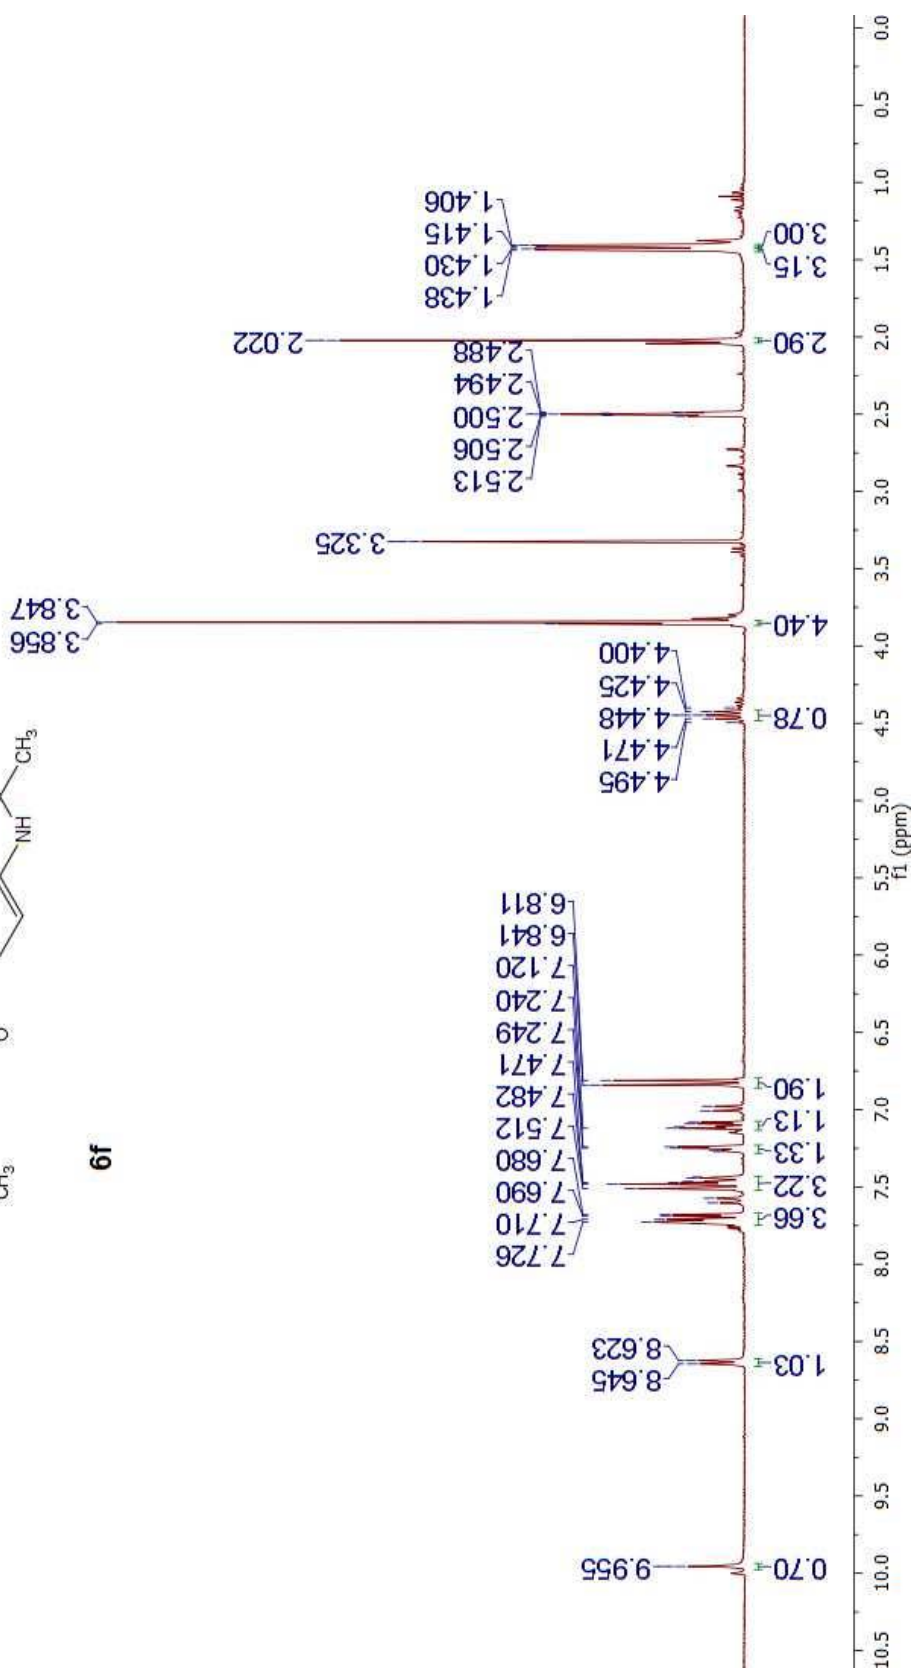

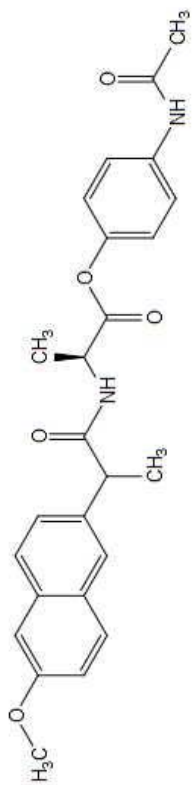

**6f**

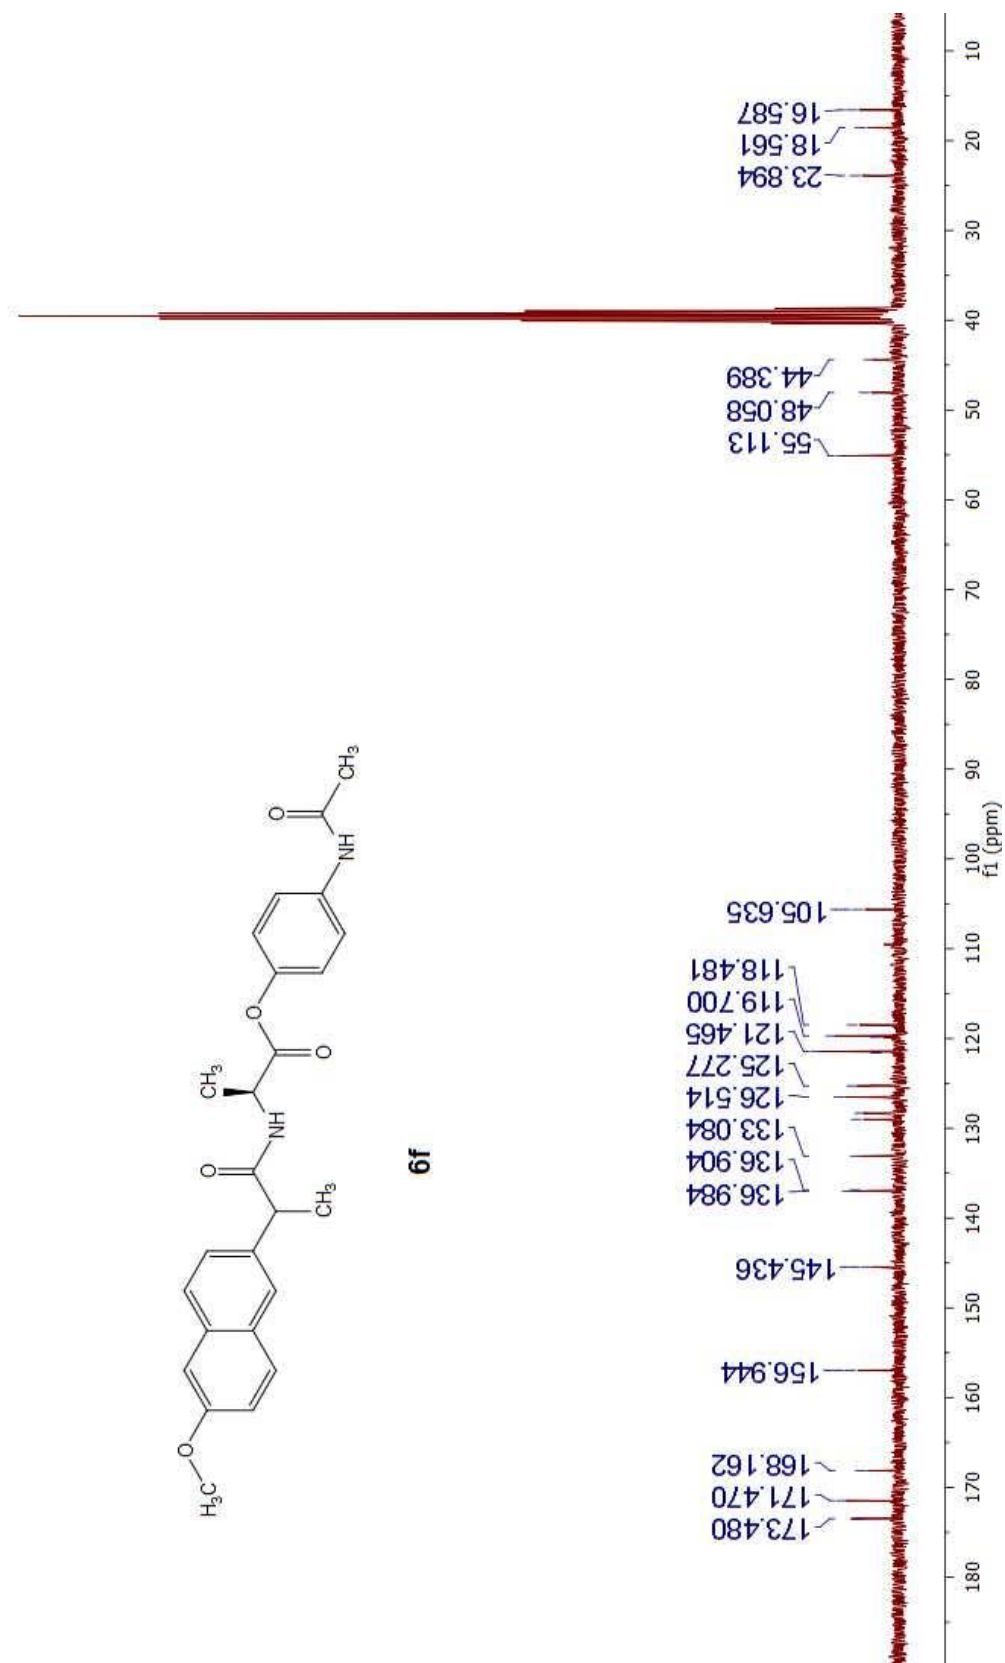

EAGER 200 Stripchart

Sample Ident. : 17 AD256      Filename : 283317  
 Analysed : 11-13-13 11:59:36      Printed : 11-13-2013 16:03:18

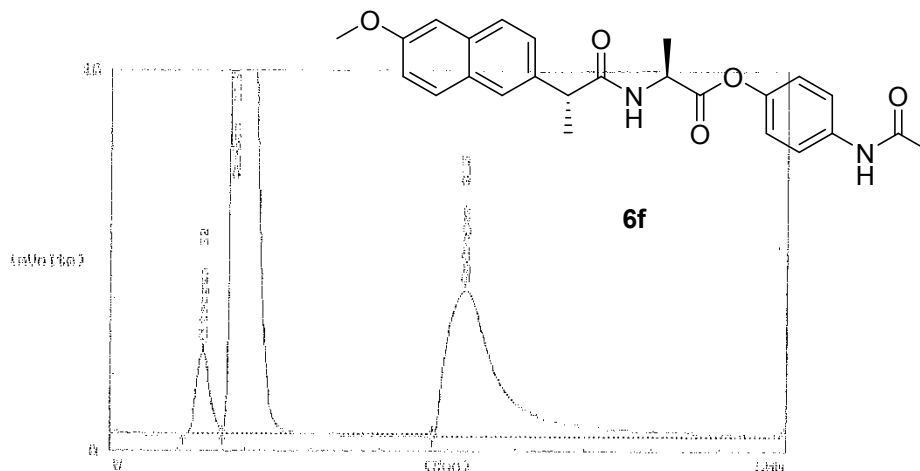

EAGER 200 Peak Integration Report

Instrument name : Instrument #1      Bline drift (fV):-5.7  
 Company Name : U of Florida      Operator Ident. : KOU  
 Analysed : 11-13-13 11:59:36      Printed : 11-13-2013 16:03:18  
 Sample Ident. : 17 AD256      Filename : 283317  
 Sample Weight : 2.098      Calc.method: using 'K. Factors'

| No. (#) | Type (#) | Start (Sec) | End (Sec) | Ret Time (Sec) | Height (fV) | Area (fV*Sec) | Area % (%) | Name     |
|---------|----------|-------------|-----------|----------------|-------------|---------------|------------|----------|
| 1       | FU       | 65          | 100       | 82             | 2139.9      | 28602         | 2.70       | Nitrogen |
| 2       | FU       | 100         | 286       | 110            | 54653.6     | 824730        | 77.97      | Carbon   |
| 3       | RS       | 286         | 598       | 315            | 3776.9      | 204449        | 19.33      | Hydrogen |
|         |          |             |           |                |             |               | 1057780    | 100.00   |

EAGER 200 Unk Report

Instrument name : Instrument #1      Bline drift (fV):-5.7  
 Company Name : U of Florida      Operator Ident. : KOU  
 Analysed : 11-13-13 11:59:36      Printed : 11-13-2013 16:03:18  
 Sample Ident. : 17 AD256      Filename : 283317  
 Sample Weight : 2.098      Calc.method: using 'K. Factors'

| Pk. (#) | Ret Time (Sec) | Area (fV*Sec) | Element % (%) | Area Ratio  | Name     |
|---------|----------------|---------------|---------------|-------------|----------|
| 1       | 82             | 28602         | 6.618         | .288350E+02 | Nitrogen |
| 2       | 110            | 824730        | 68.854        | .100000E+01 | Carbon   |
| 3       | 315            | 204449        | 6.452         | .403392E+01 | Hydrogen |

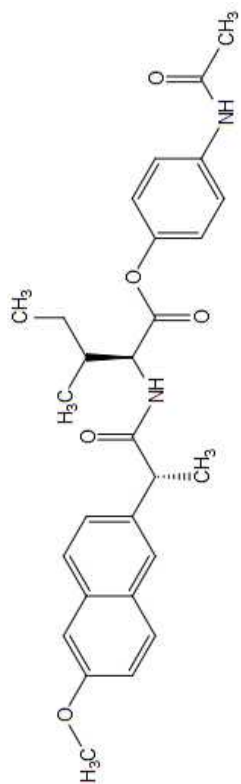

6g

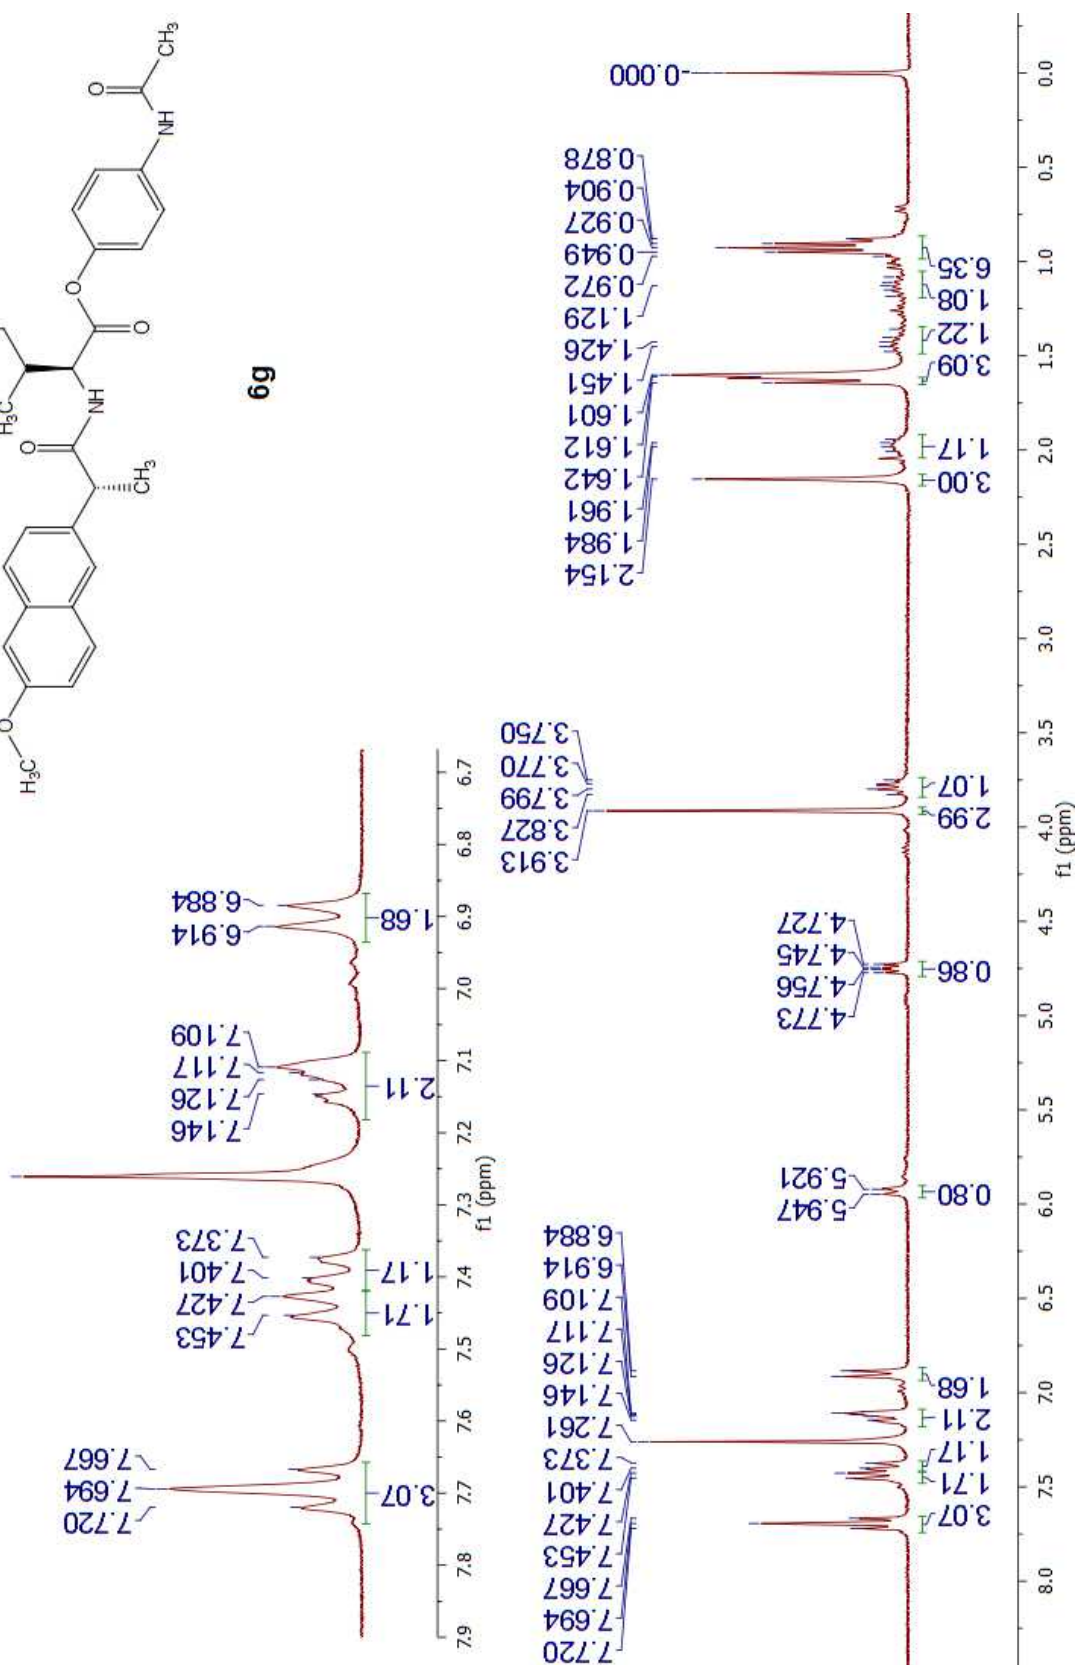



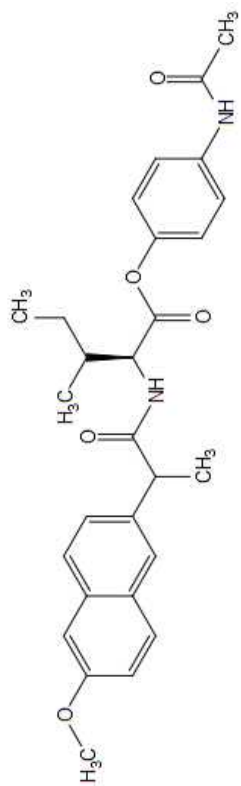

6g

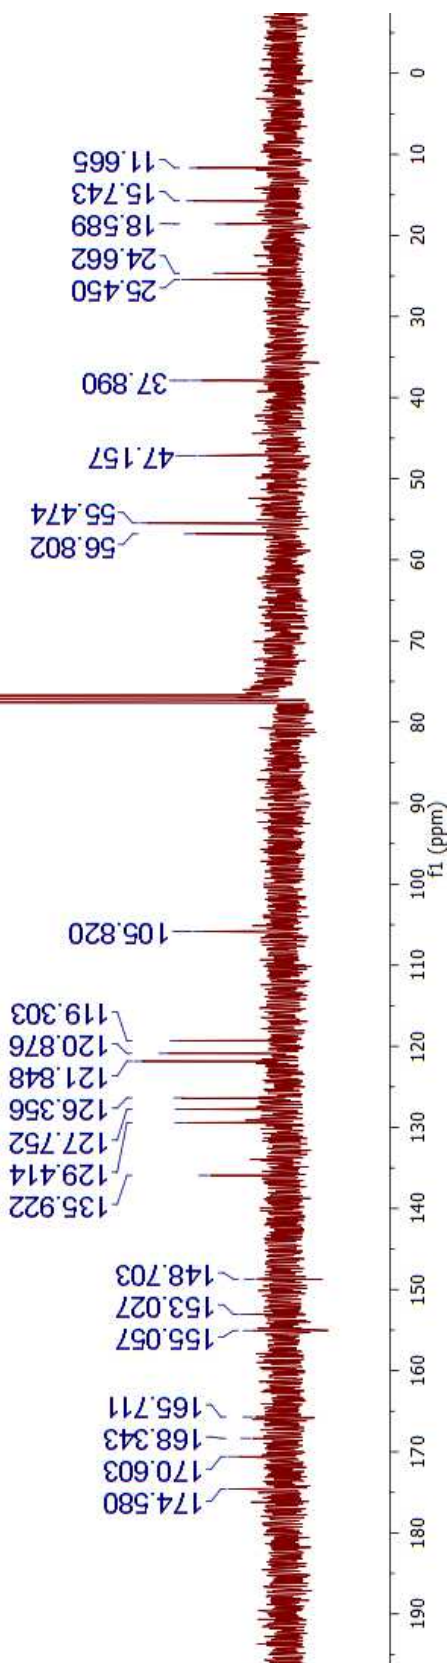

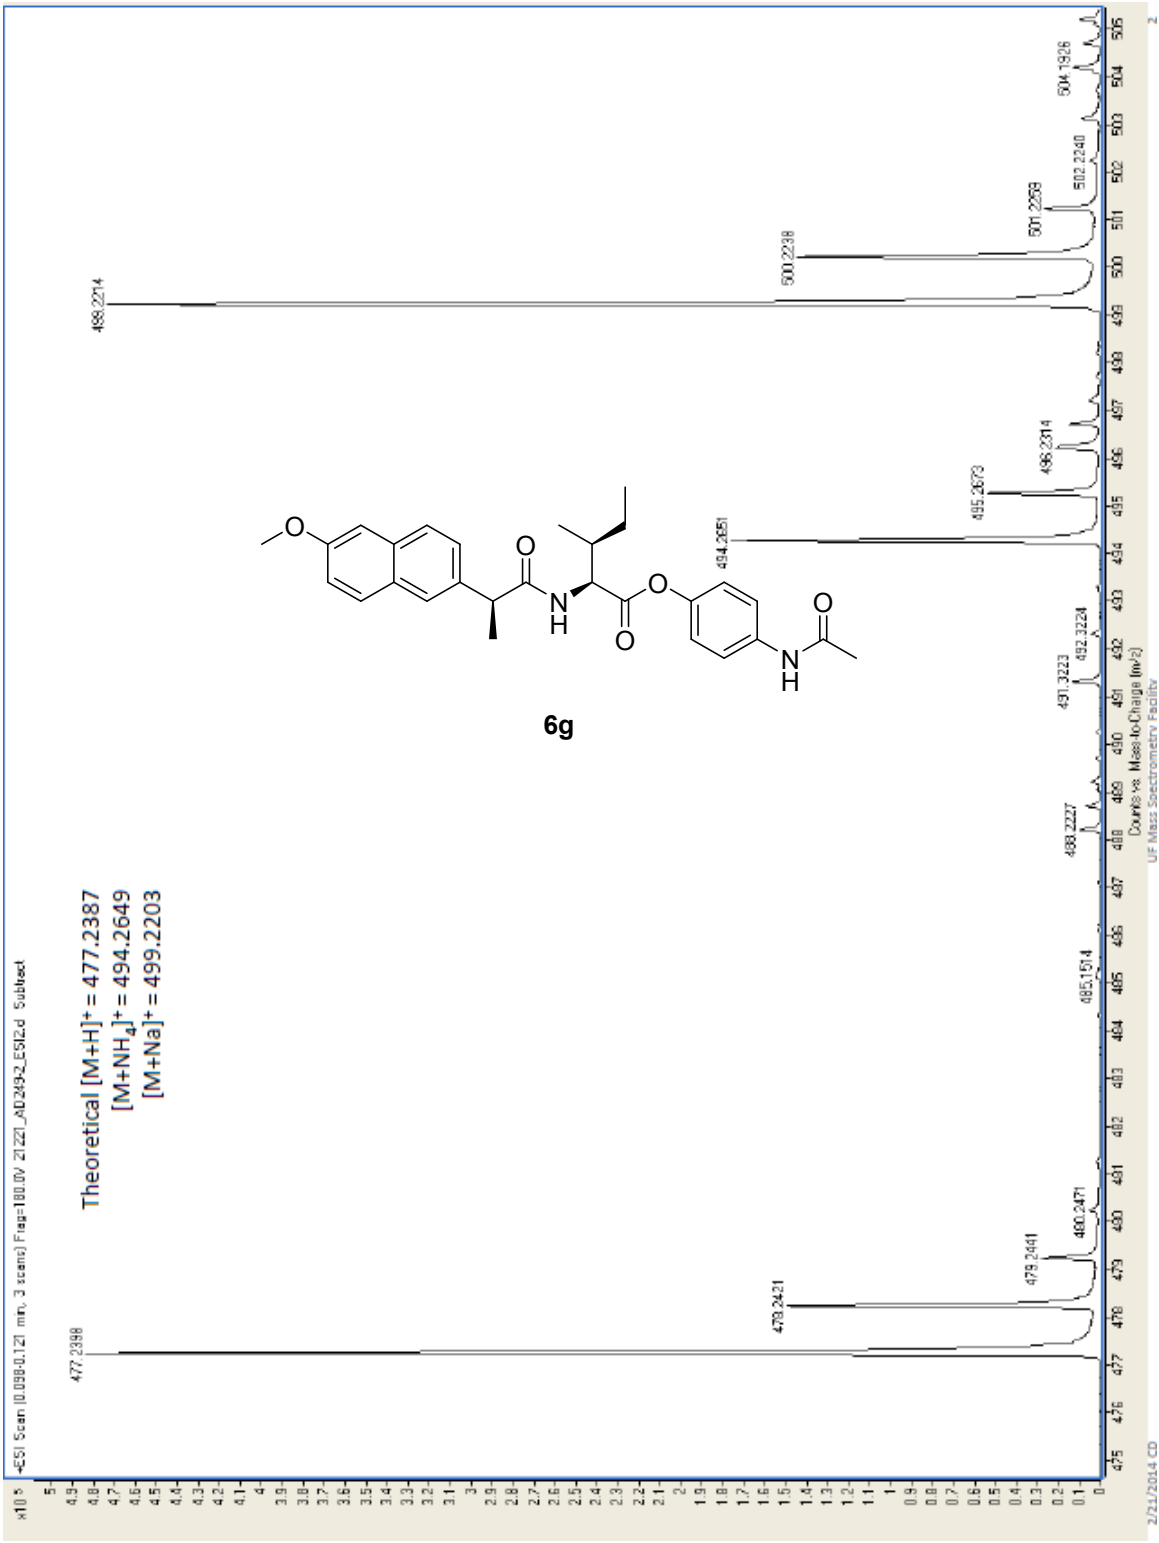

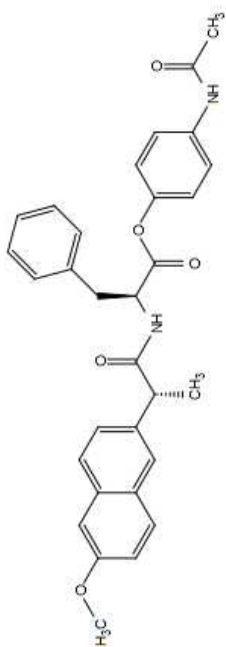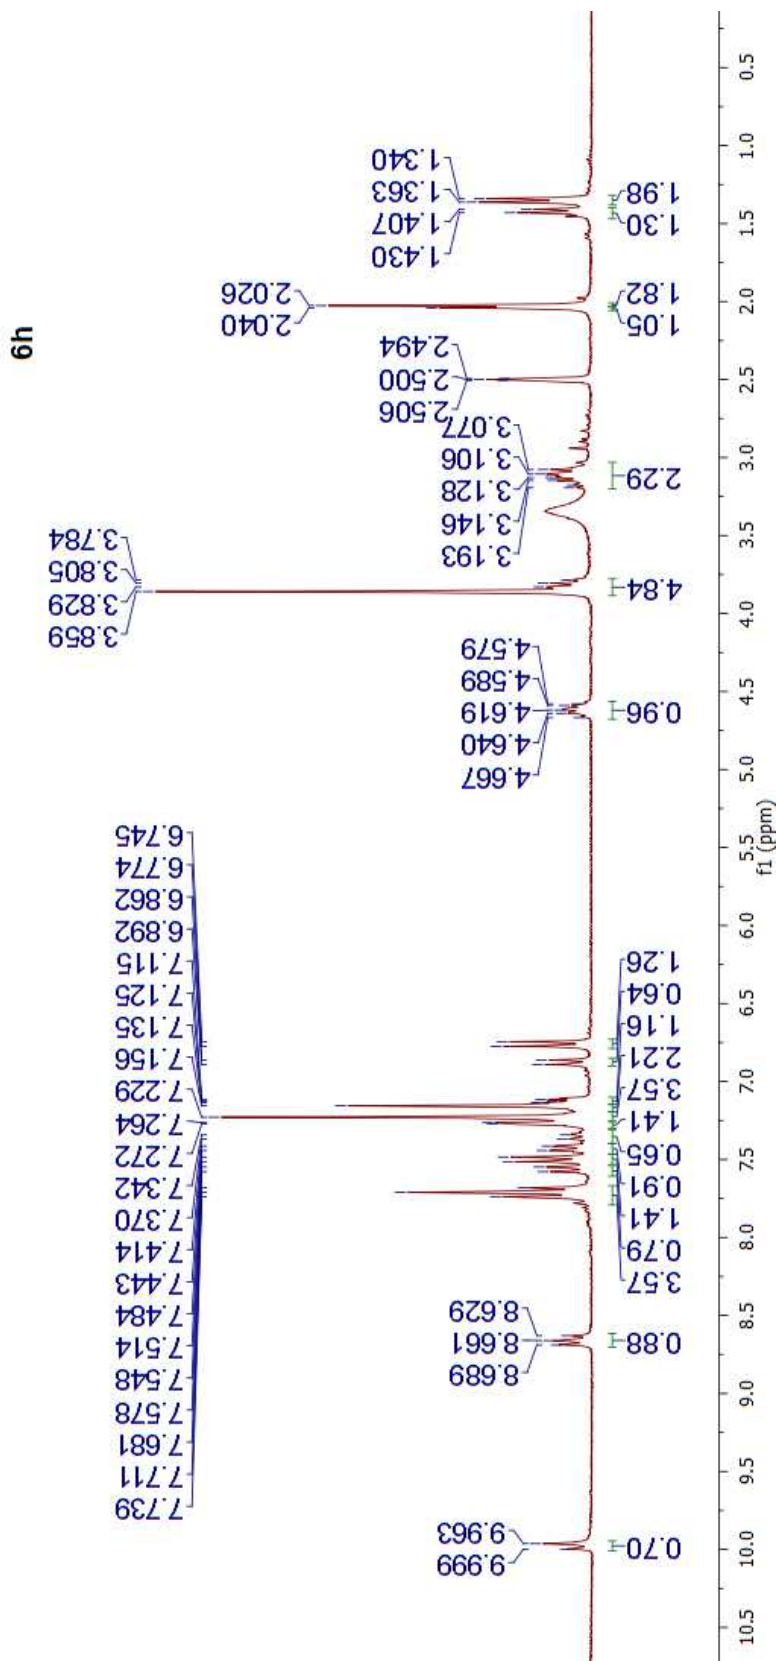

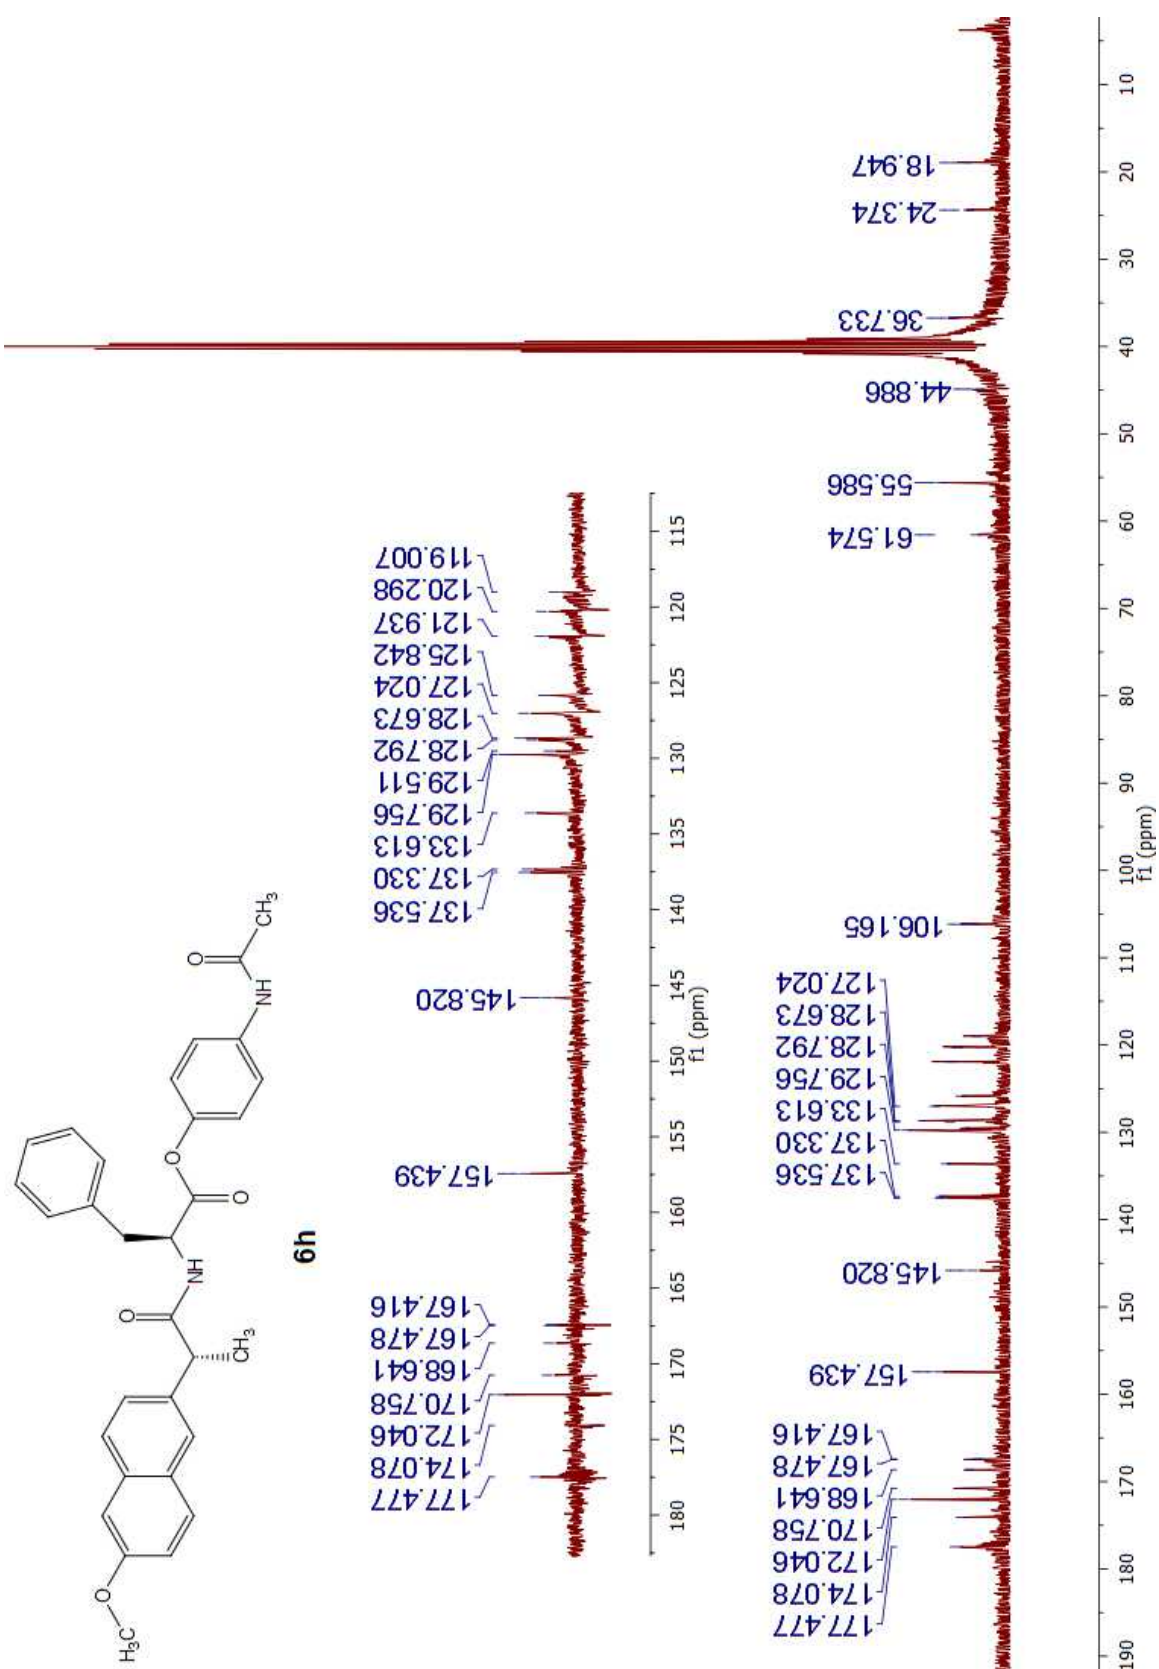

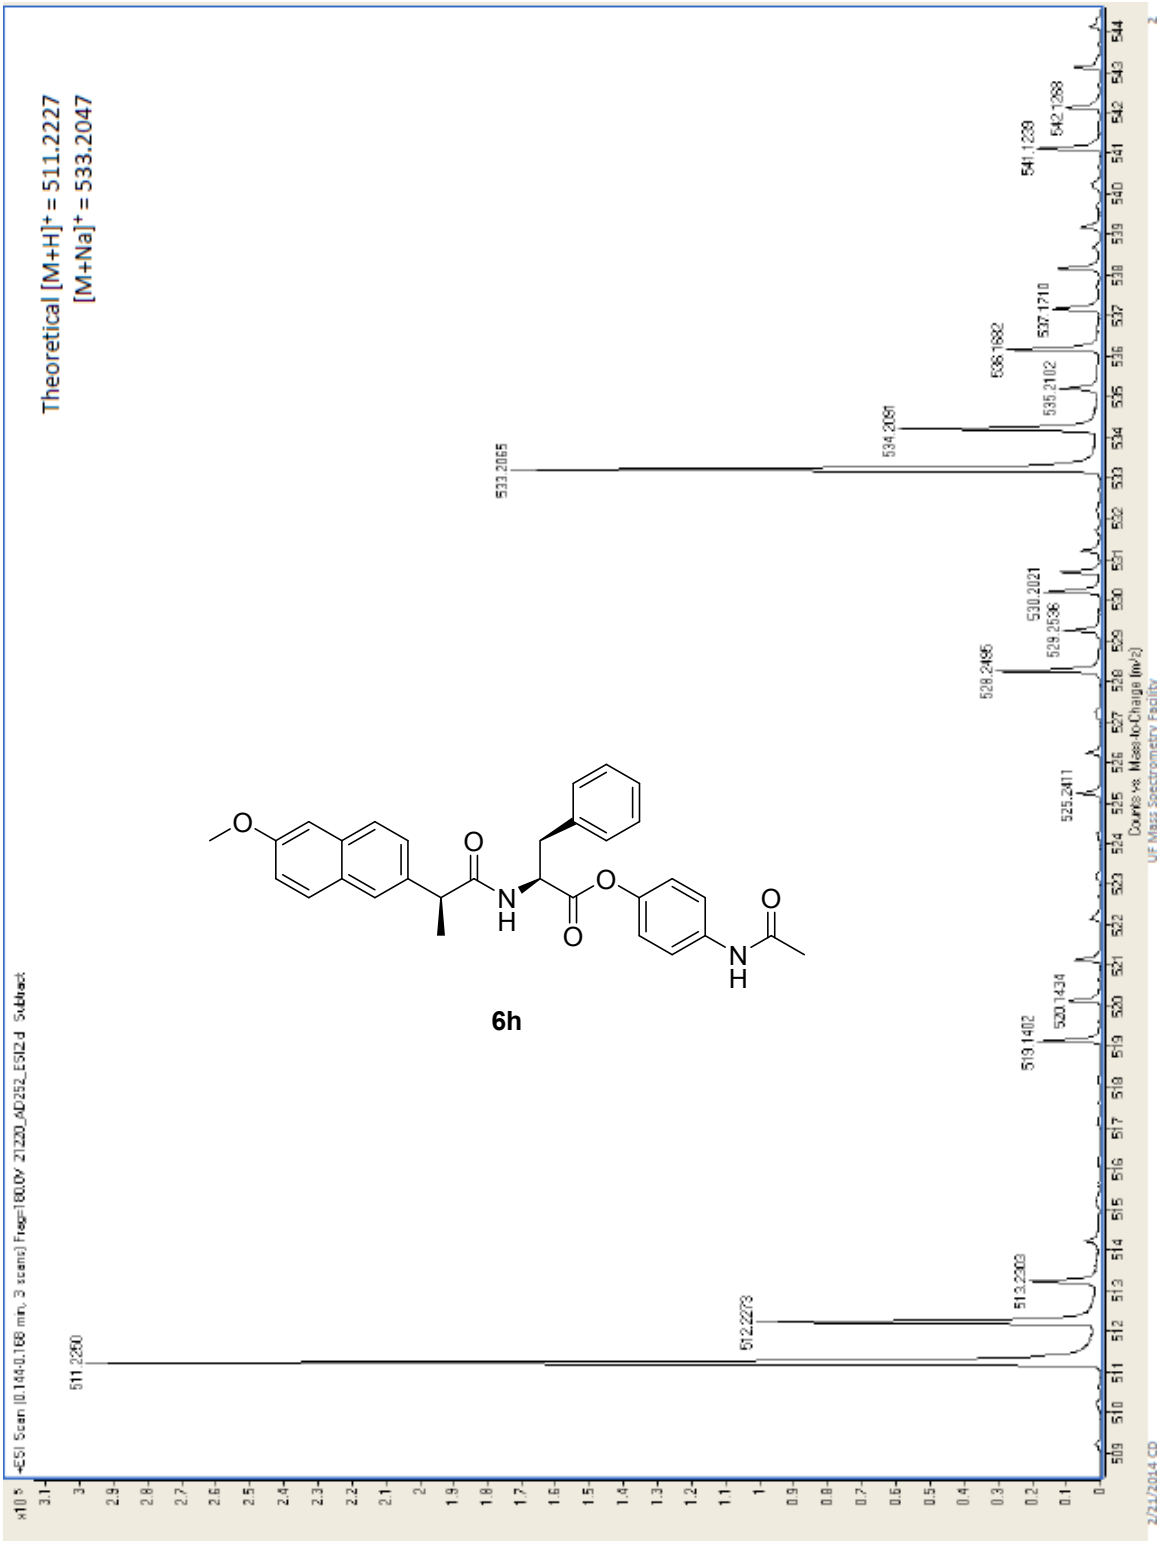

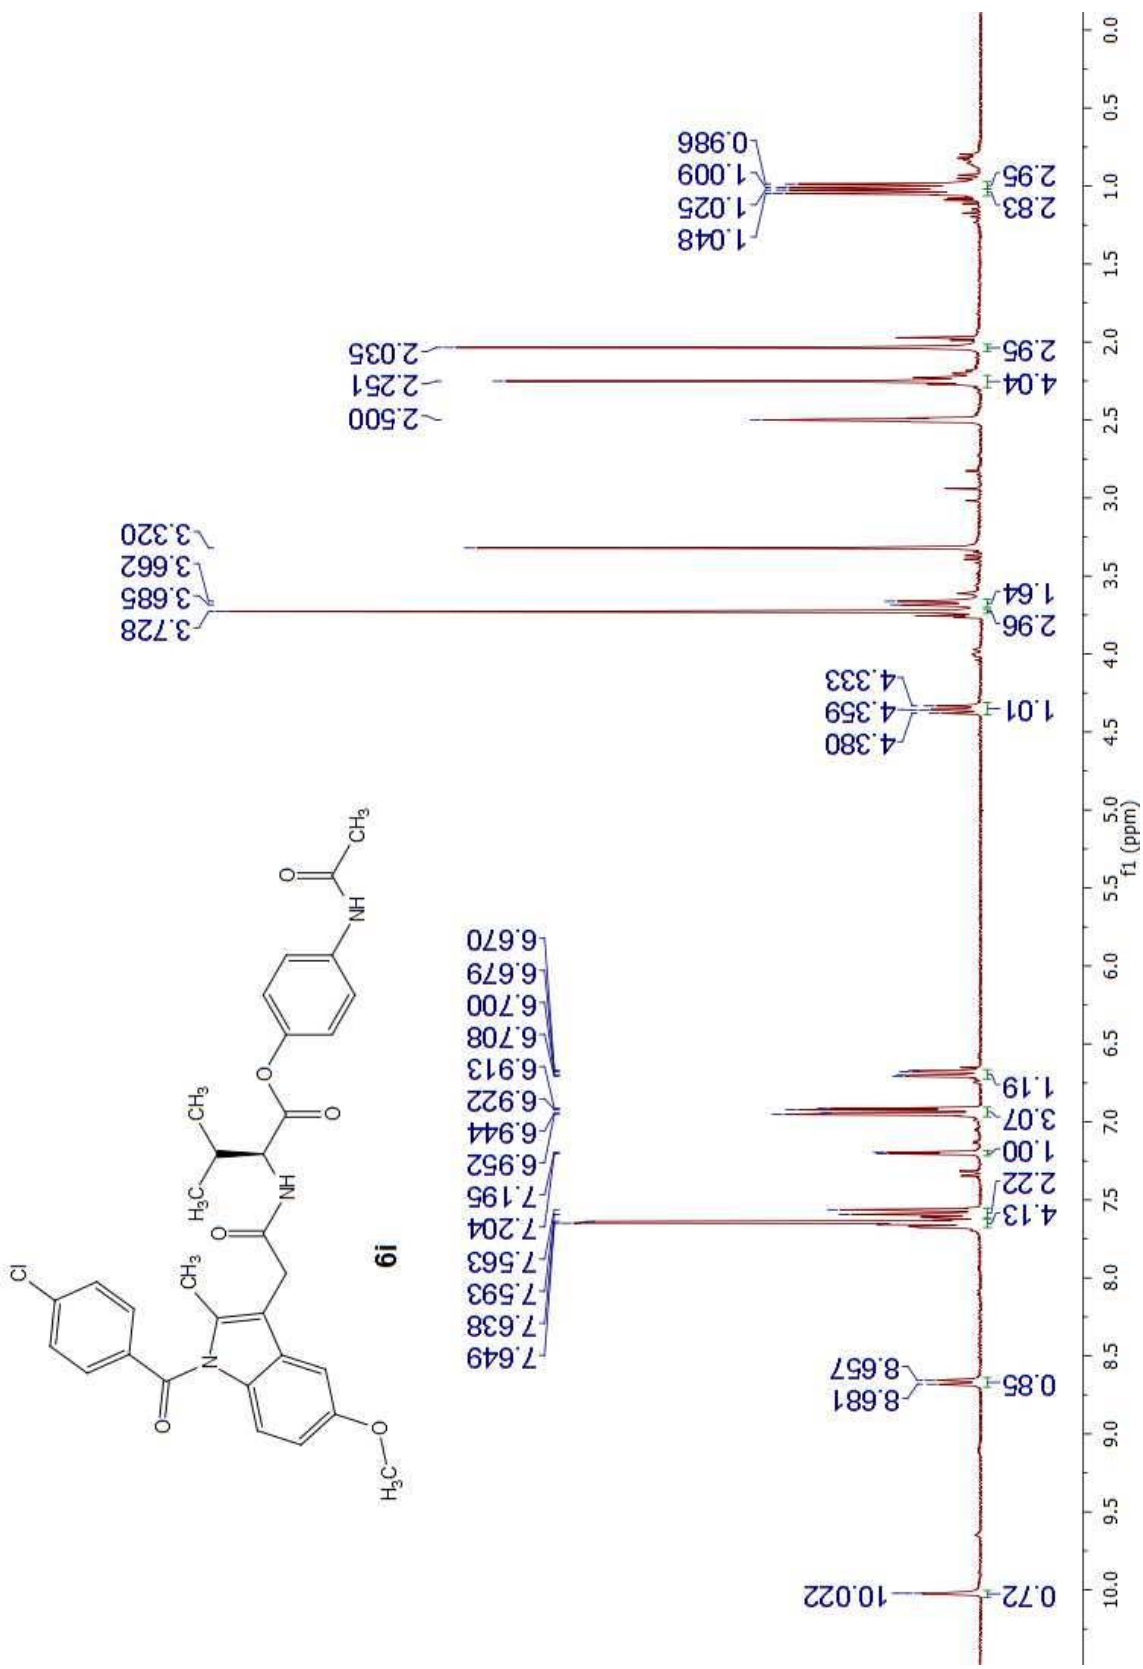

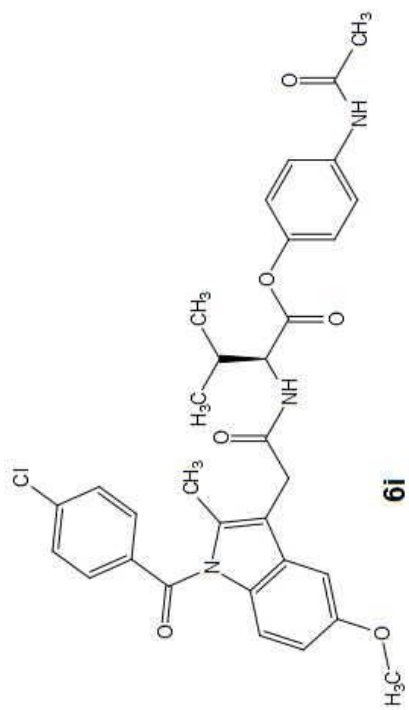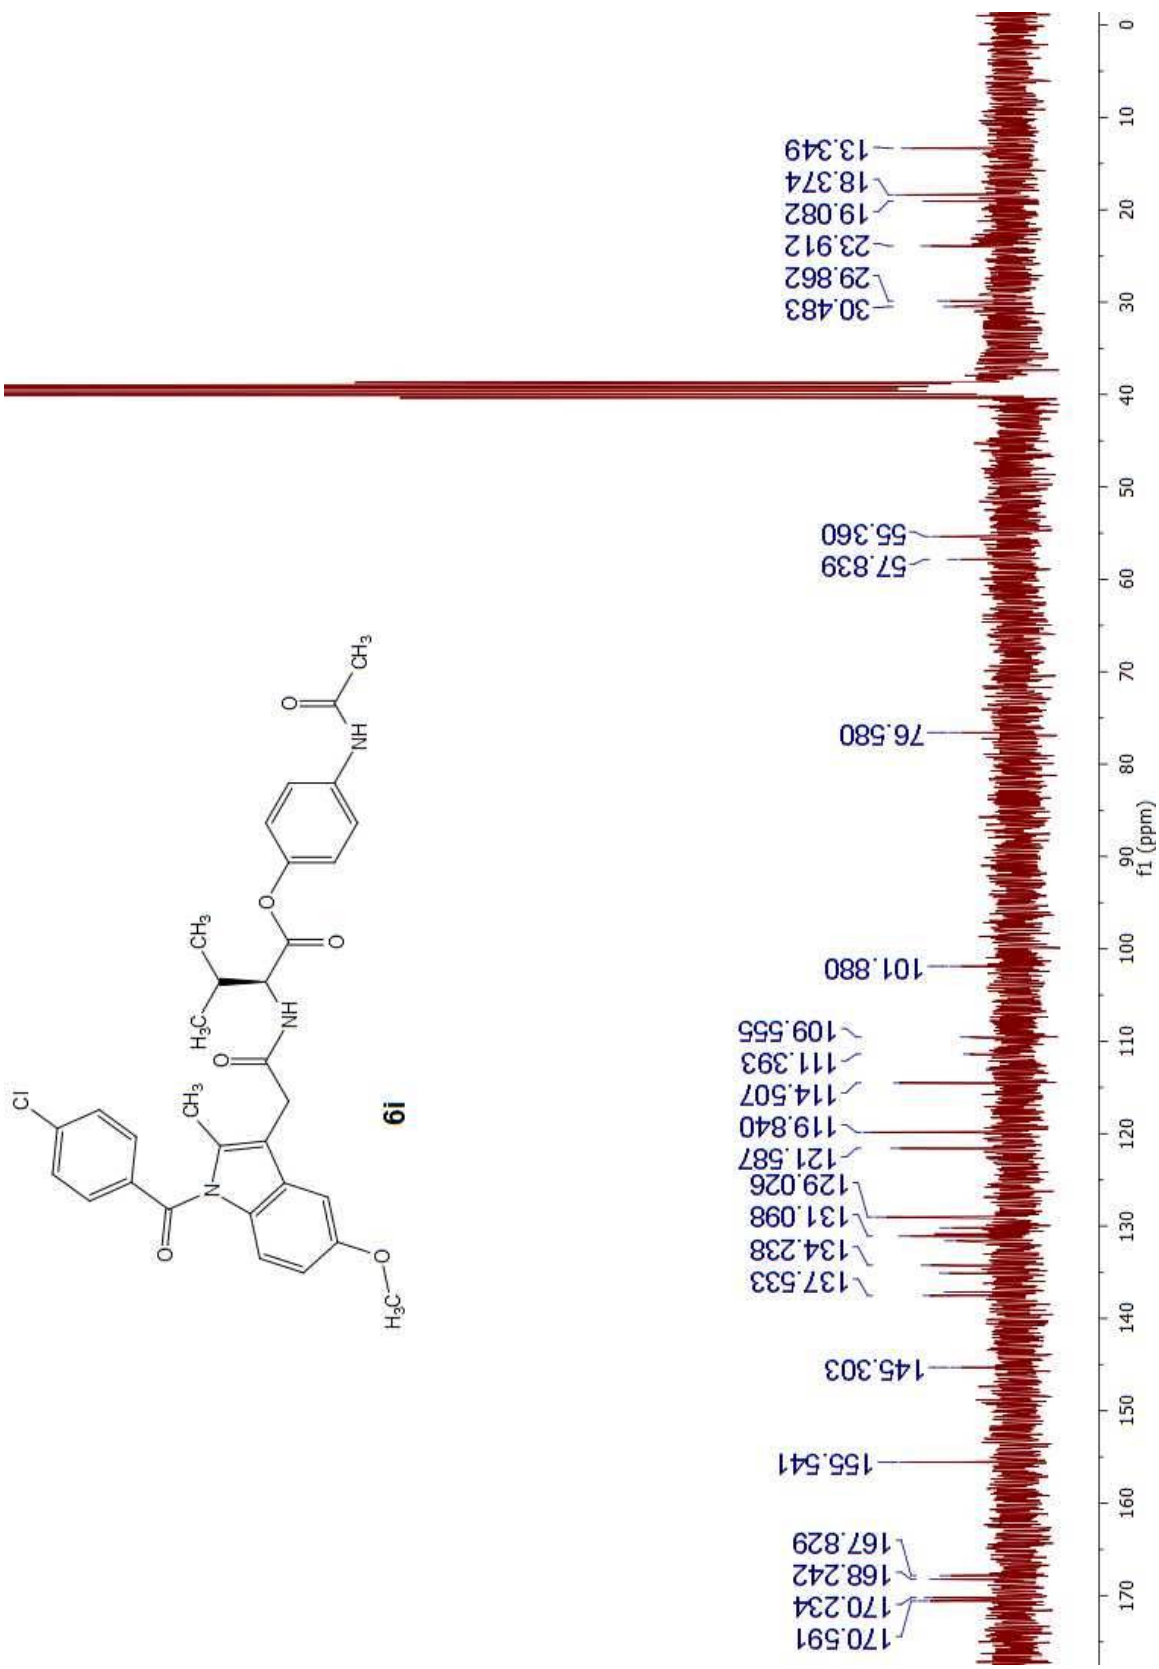

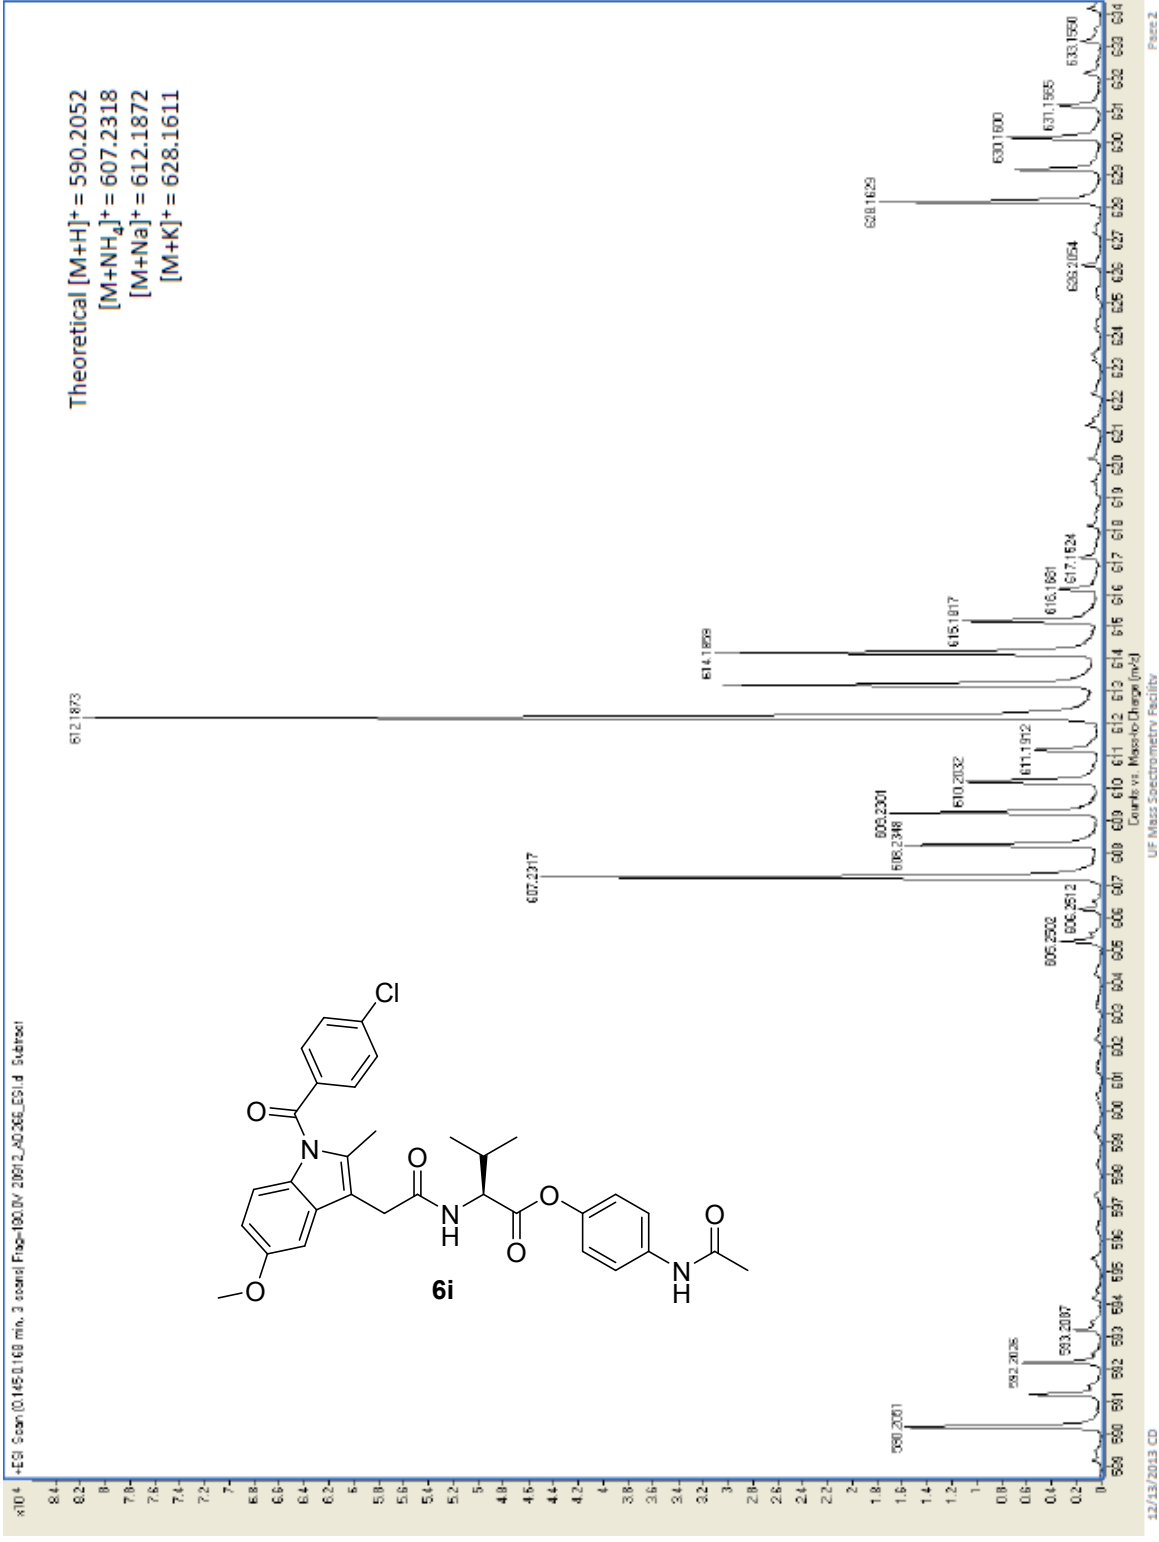



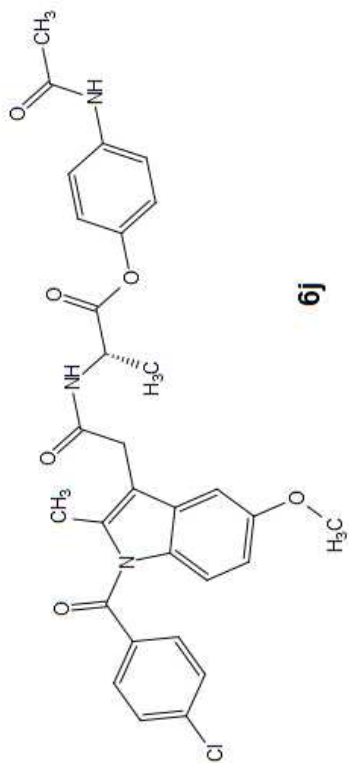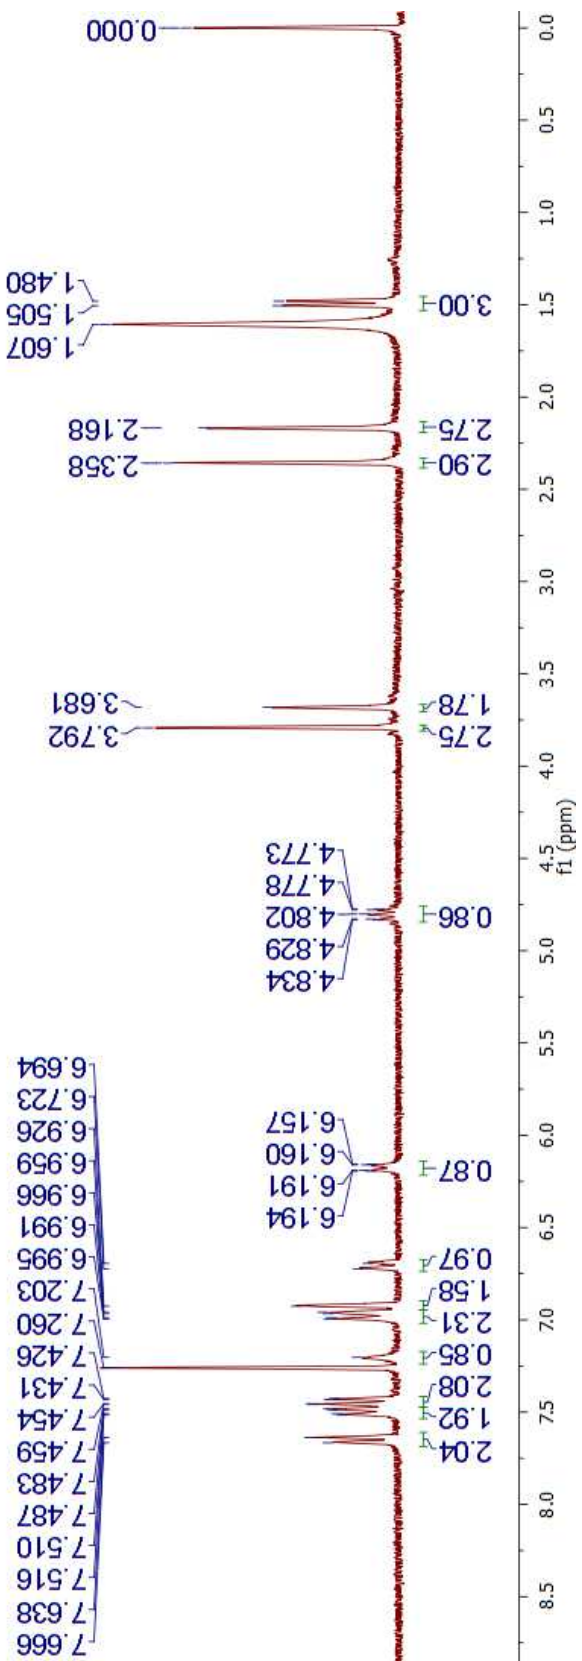

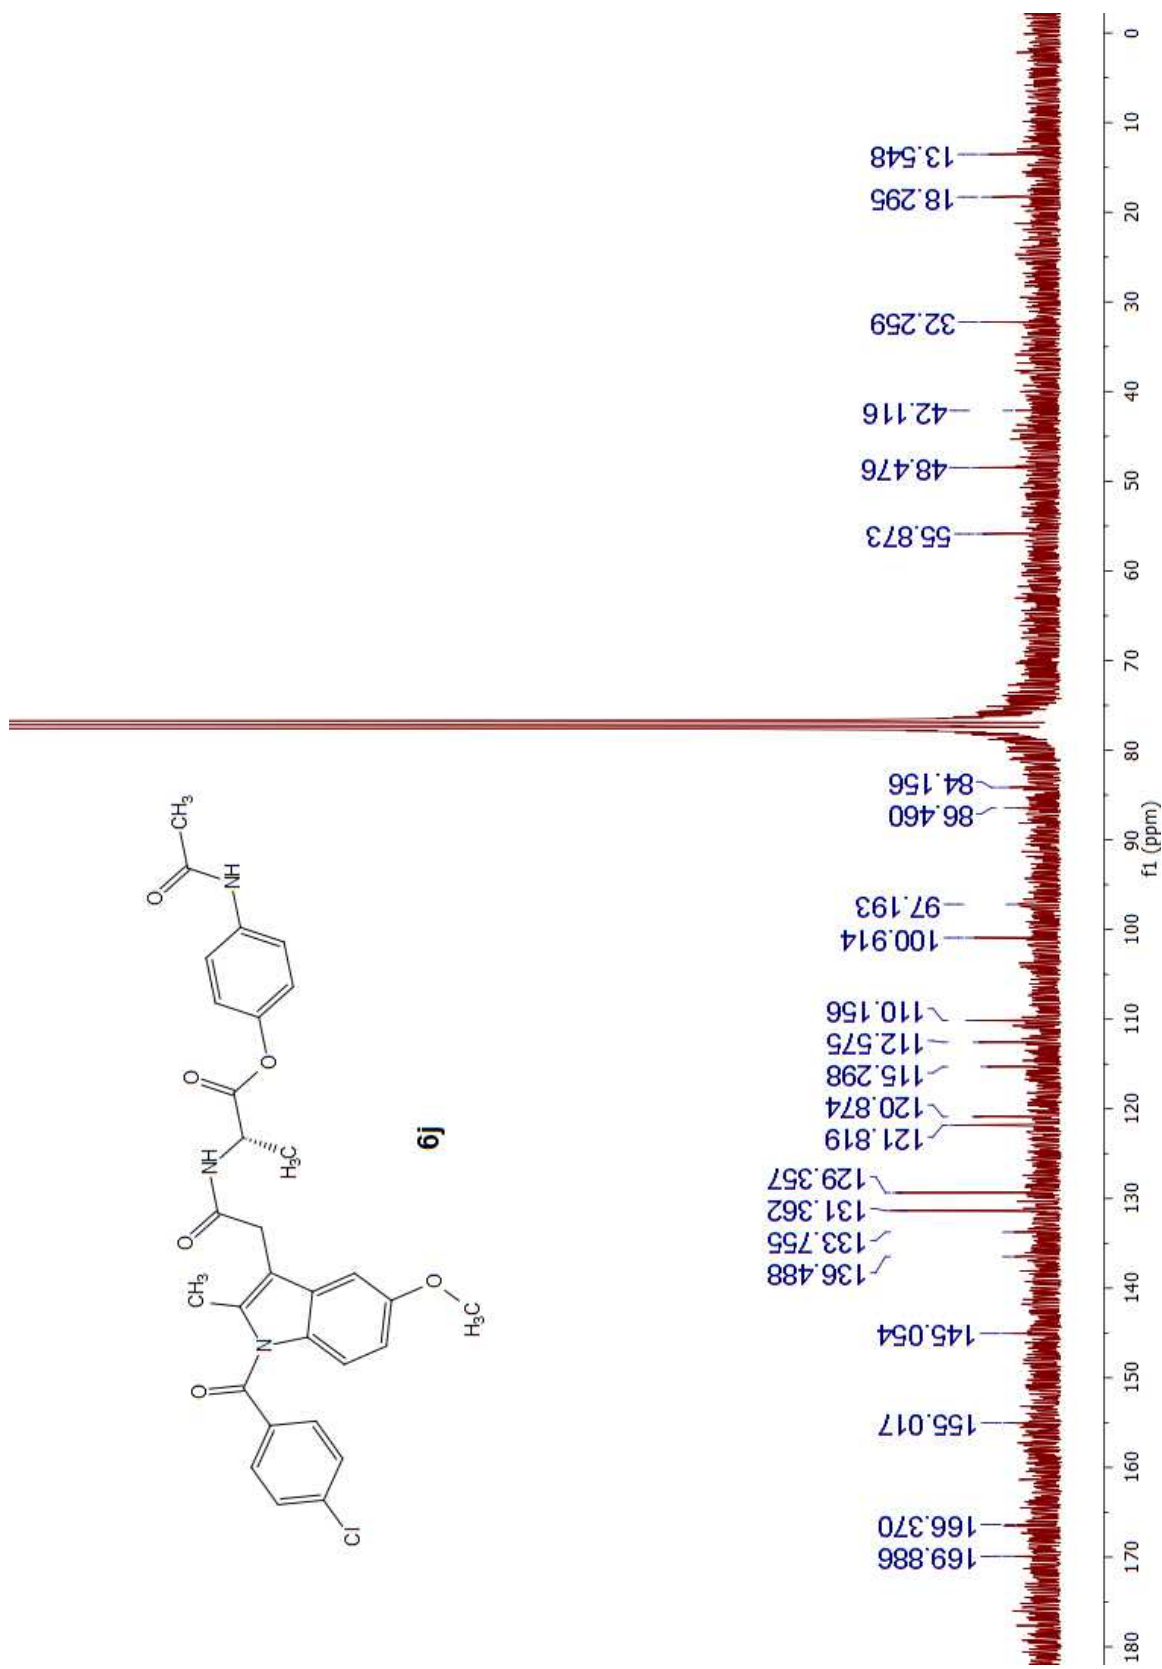

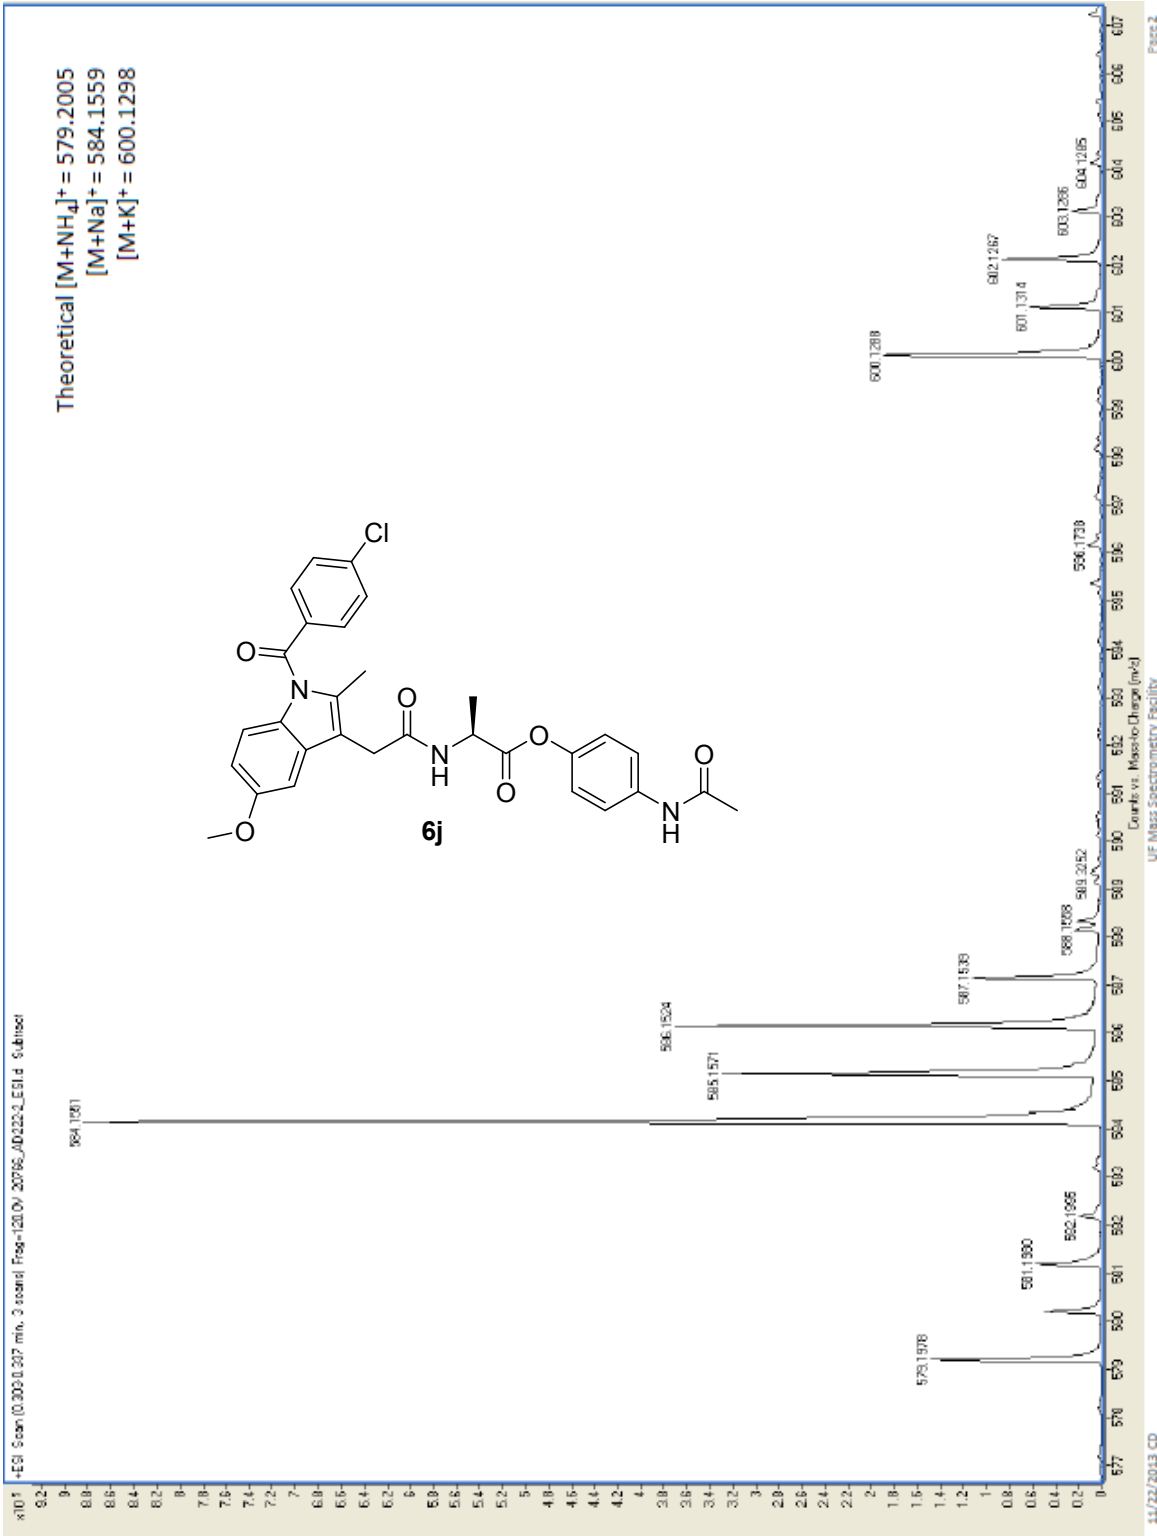

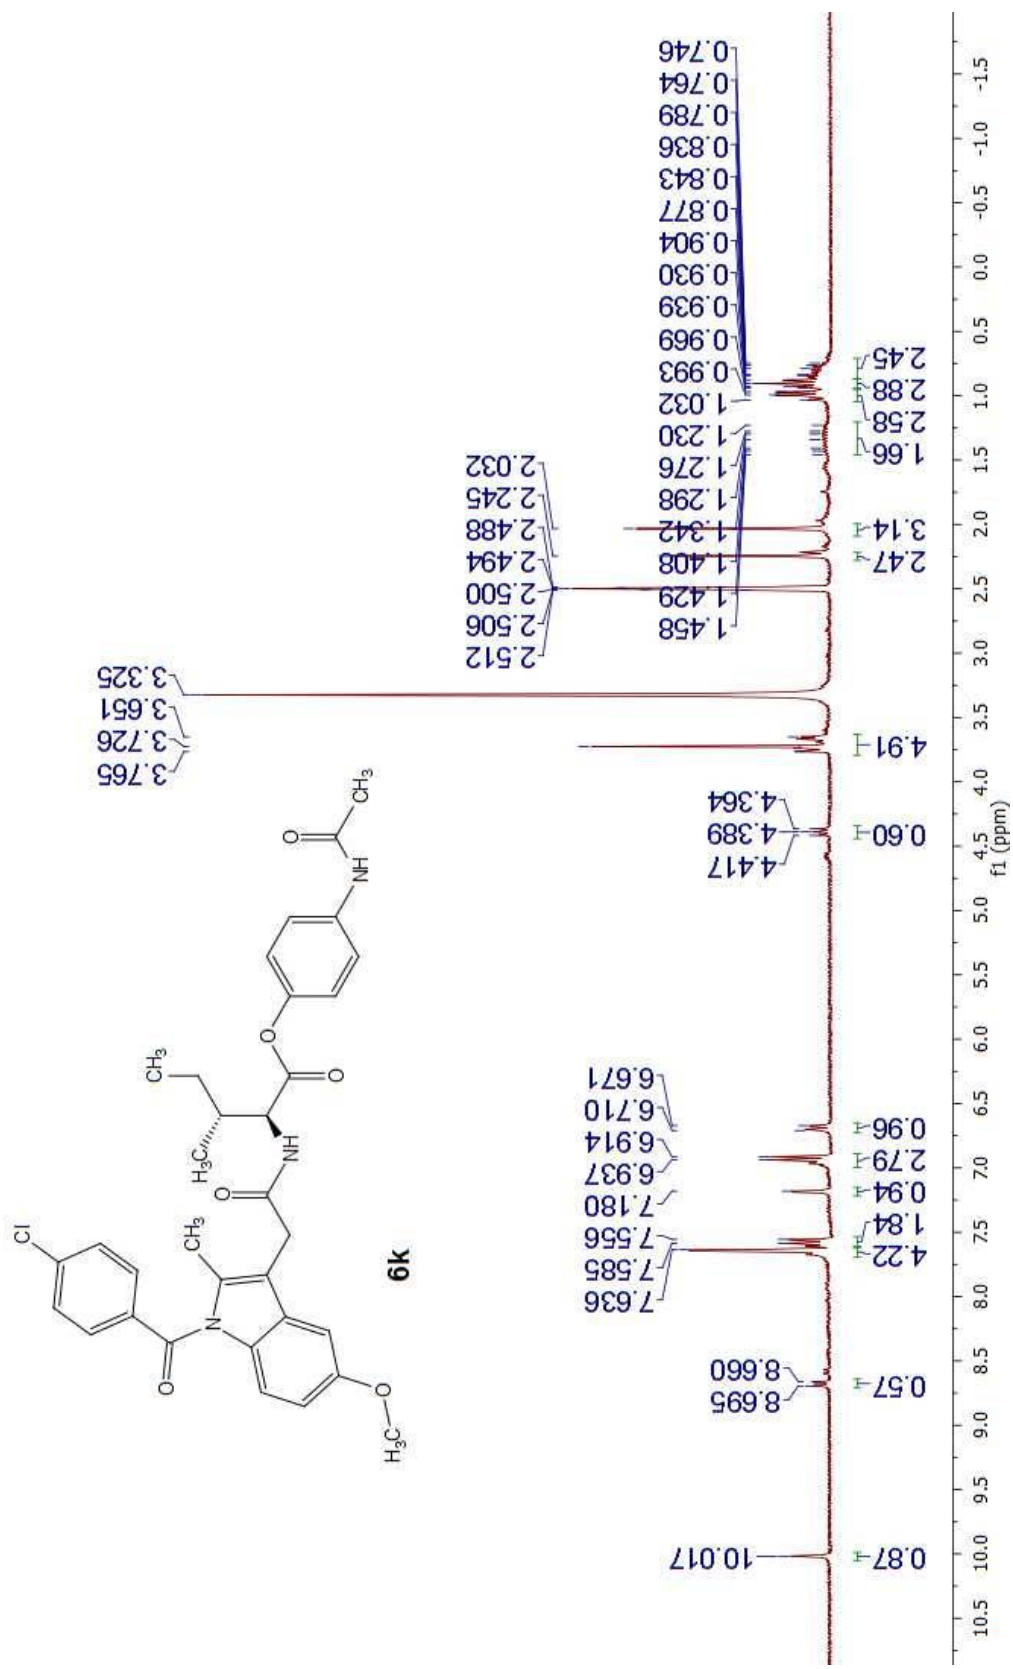

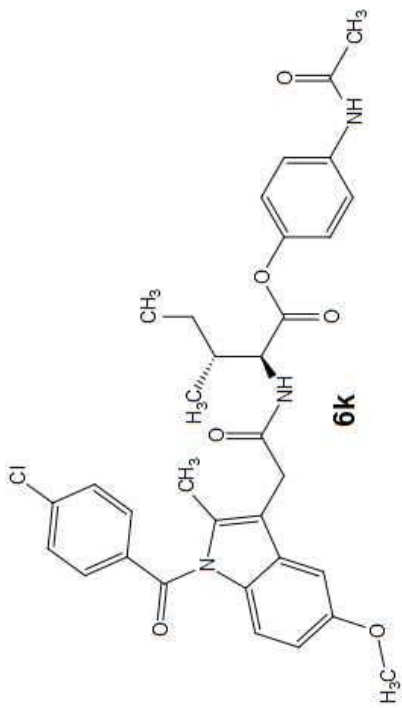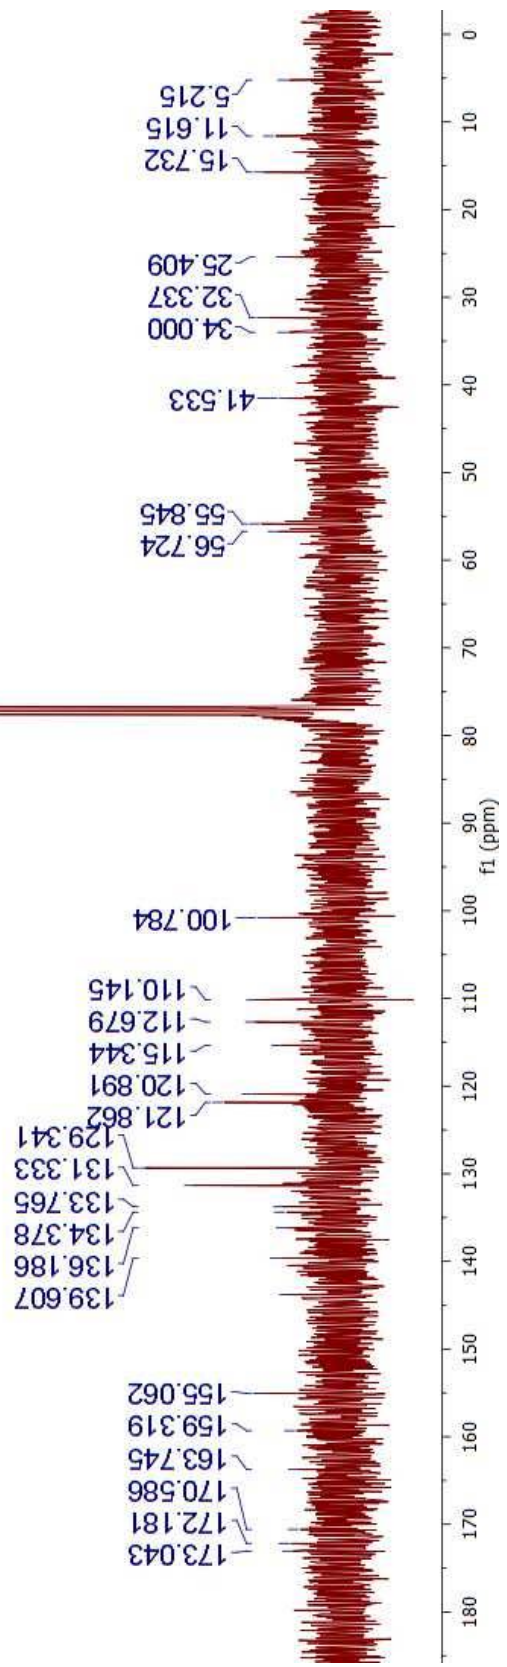

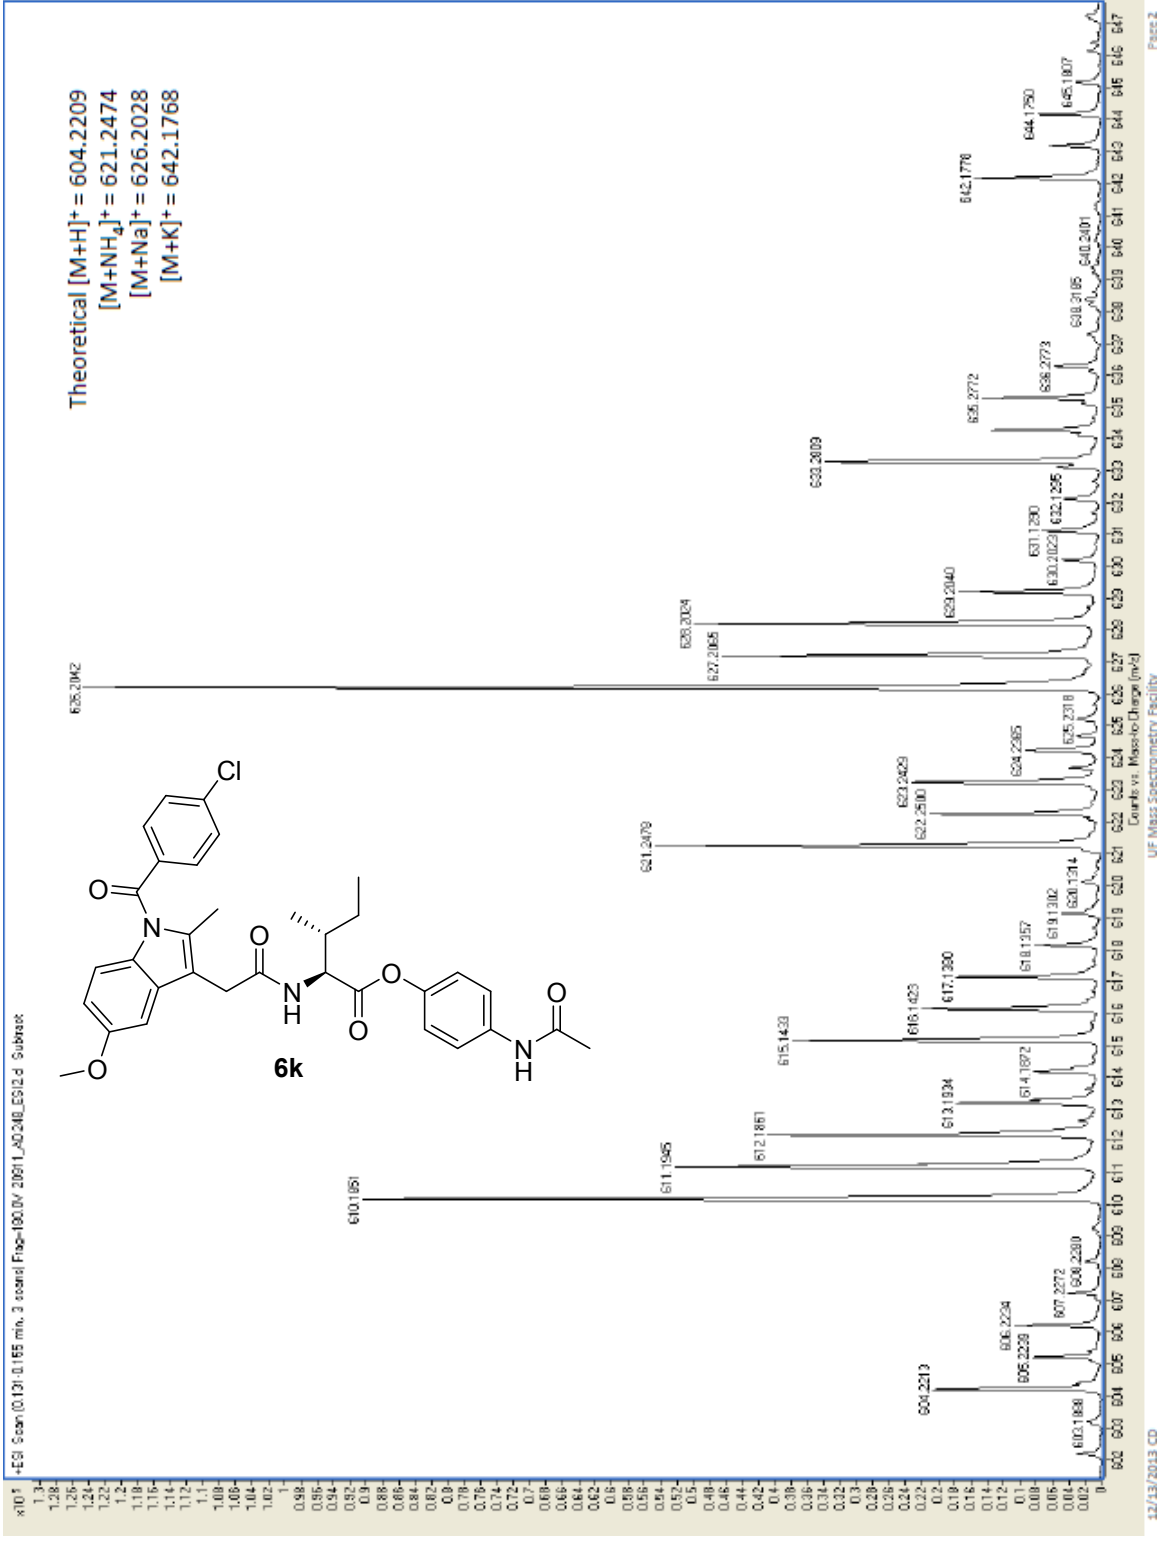

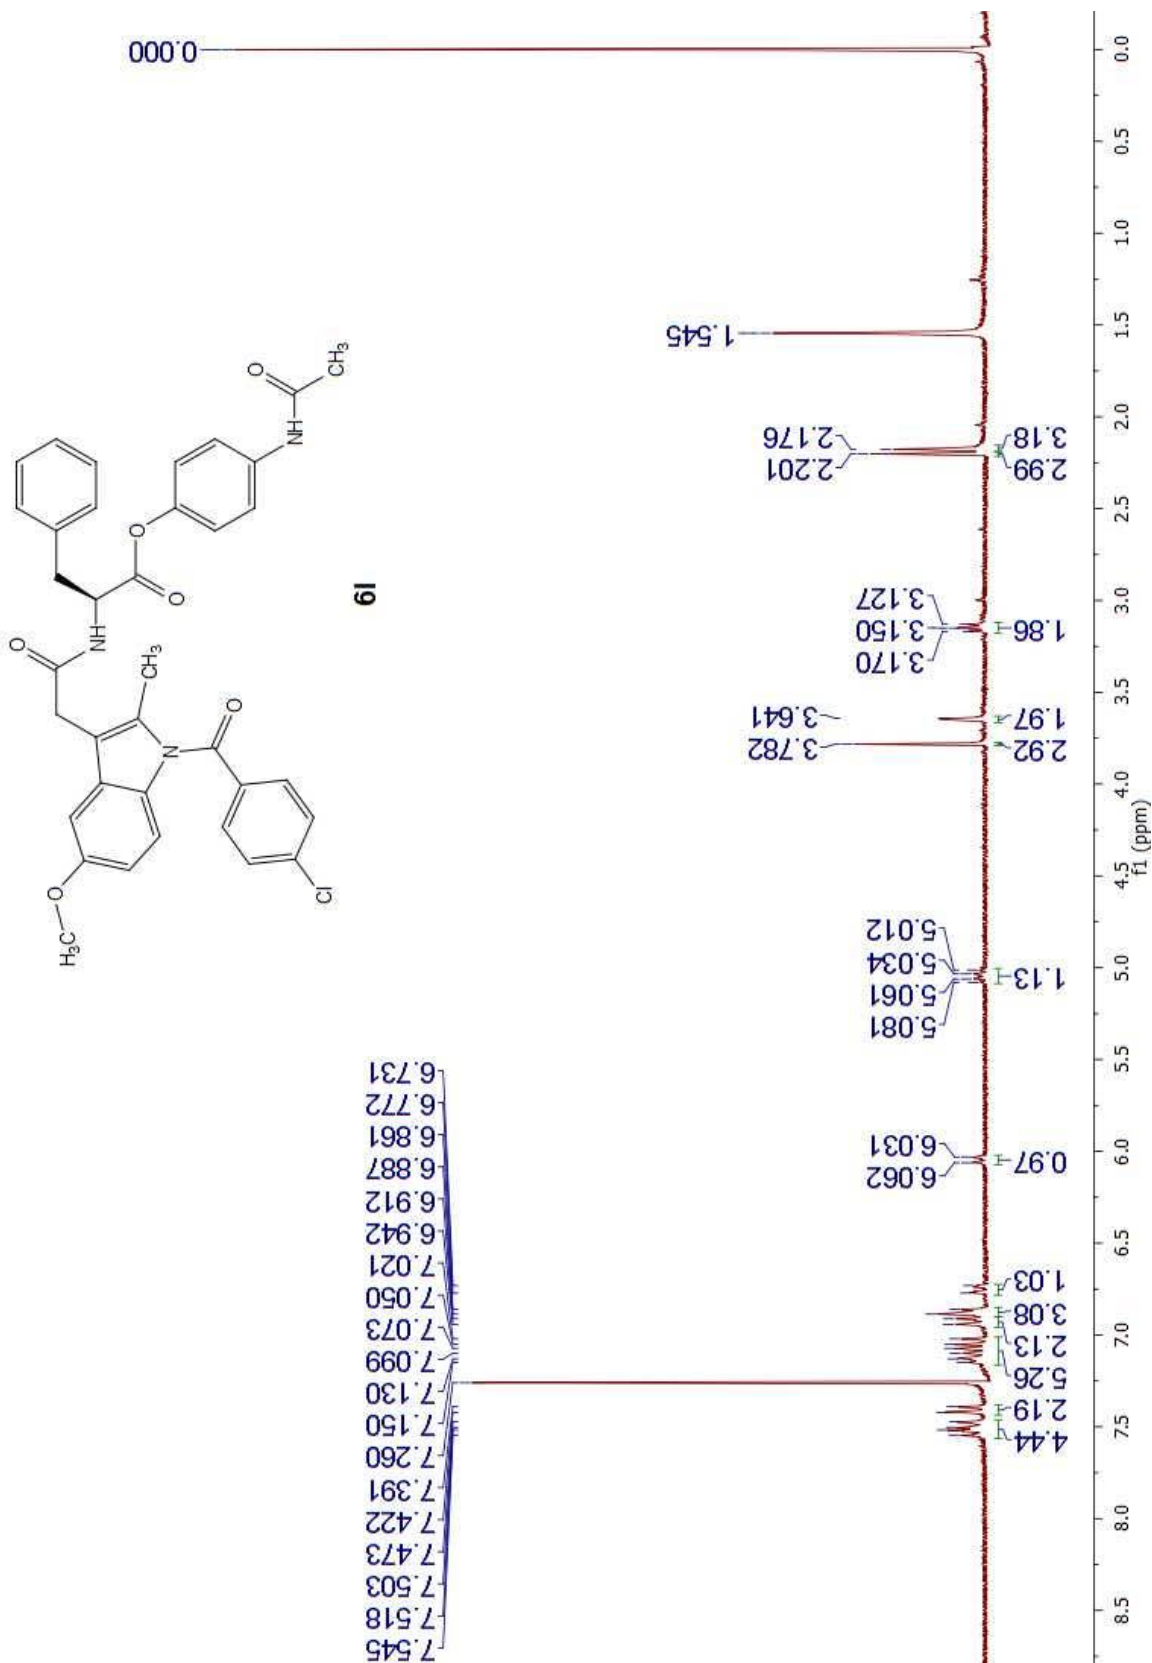

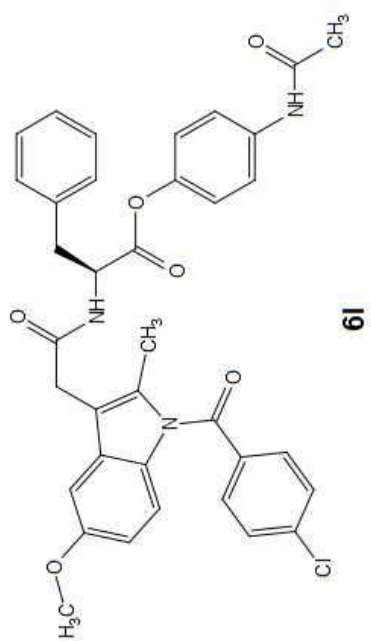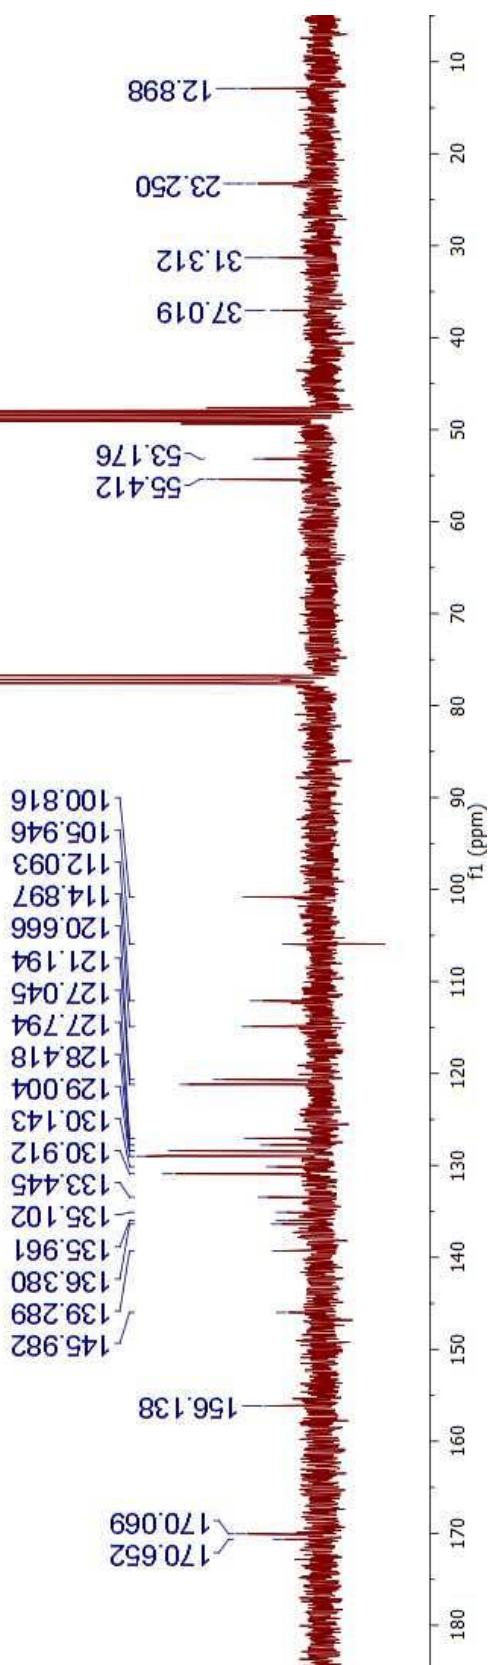



EAGER 200 Stripchart

Sample Ident. : 23 AD253\_2      Filename : 283623  
 Analysed : 11-20-13 12:53:24      Printed : 11-20-2013 14:18:02

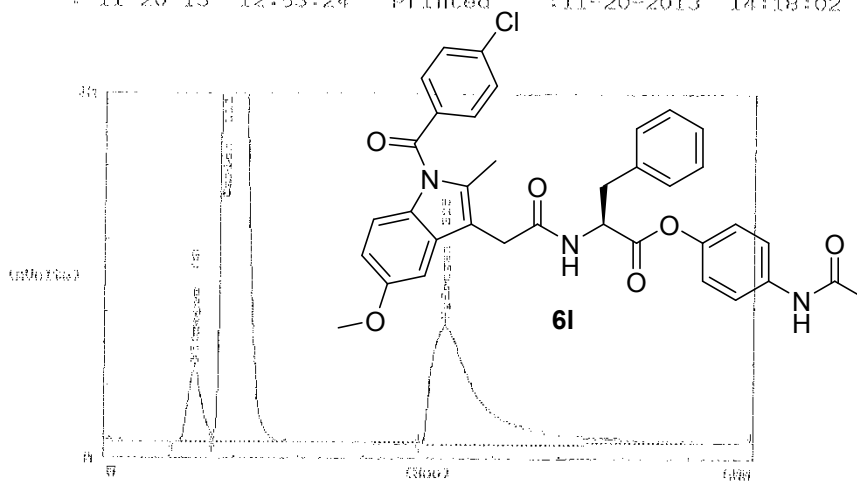

EAGER 200 Peak Integration Report

Instrument name : Instrument #1      Bline drift (fV):-3.7  
 Company Name : U of Florida      Operator Ident. : KOU  
 Analysed : 11-20-13 12:53:24      Printed : 11-20-2013 14:18:03  
 Sample Ident. : 23 AD253\_2      Filename : 283623  
 Sample Weight : 2.074      Calc.method: using 'K. Factors'

| No. (#) | Type (#) | Start (Sec) | End (Sec) | Ret Time (Sec) | Height (fV) | Area (fV*Sec) | Area % (%) | Name     |
|---------|----------|-------------|-----------|----------------|-------------|---------------|------------|----------|
| 1       | FU       | 63          | 100       | 83             | 1955.2      | 28013         | 2.76       | Nitrogen |
| 2       | FU       | 100         | 291       | 111            | 52544.8     | 817847        | 80.72      | Carbon   |
| 3       | RS       | 291         | 598       | 315            | 3143.0      | 167314        | 16.51      | Hydrogen |
|         |          |             |           |                |             | 1013174       | 100.00     |          |

EAGER 200 Unk Report

Instrument name : Instrument #1      Bline drift (fV):-3.7  
 Company Name : U of Florida      Operator Ident. : KOU  
 Analysed : 11-20-13 12:53:24      Printed : 11-20-2013 14:18:03  
 Sample Ident. : 23 AD253\_2      Filename : 283623  
 Sample Weight : 2.074      Calc.method: using 'K. Factors'

| Pk. (#) | Ret Time (Sec) | Area (fV*Sec) | Element % (%) | Area Ratio  | Name     |
|---------|----------------|---------------|---------------|-------------|----------|
| 1       | 83             | 28013         | 6.460         | .221953E+02 | Nitrogen |
| 2       | 111            | 817847        | 68.036        | .100000E+01 | Carbon   |
| 3       | 315            | 167314        | 5.345         | .488310E+01 | Hydrogen |

## HPLC of compound **6b** and **6f**

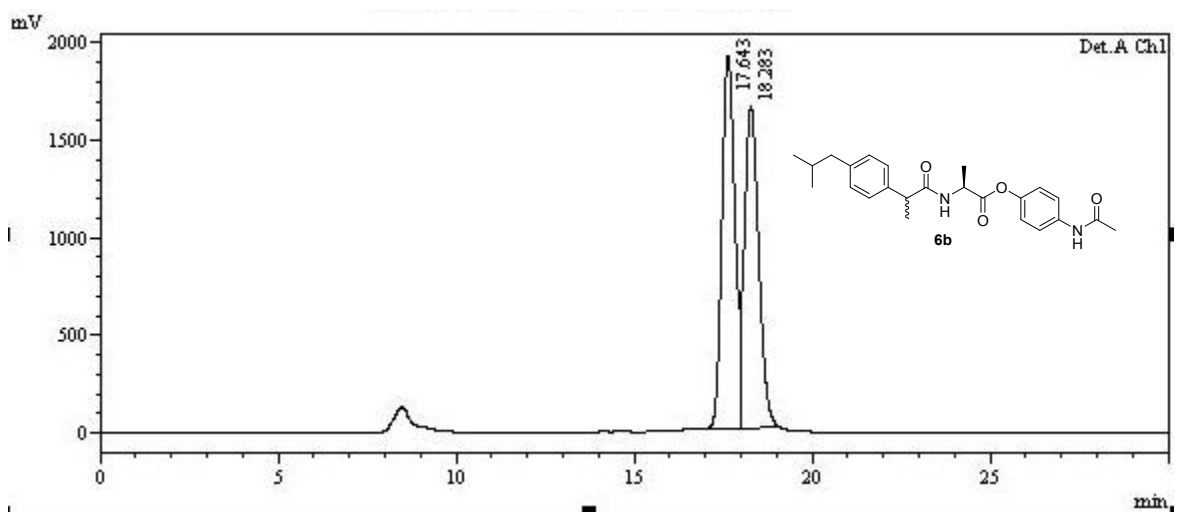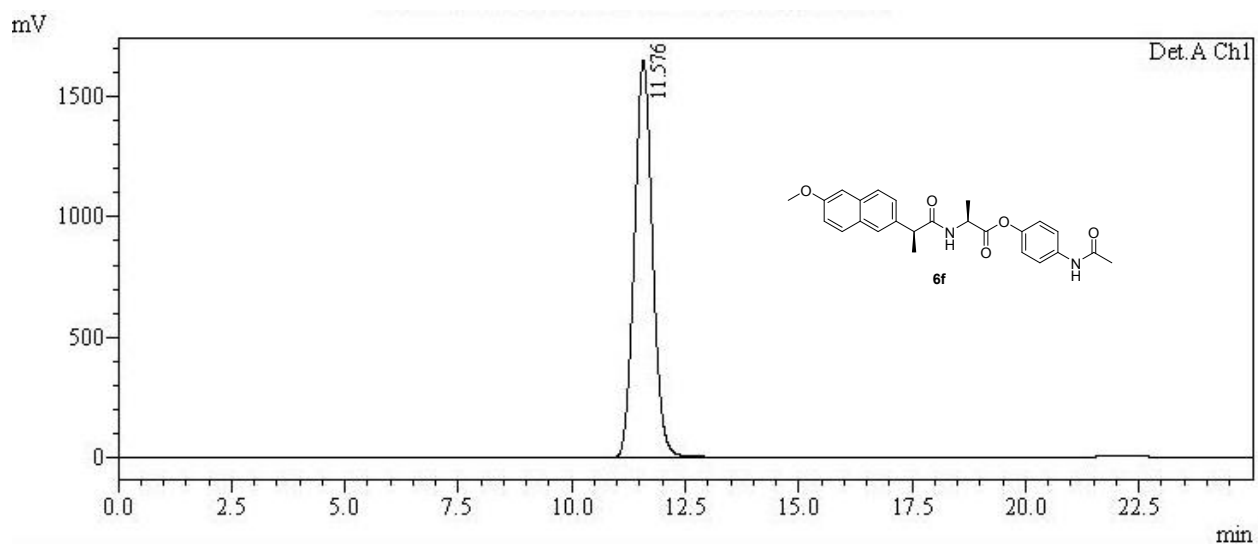

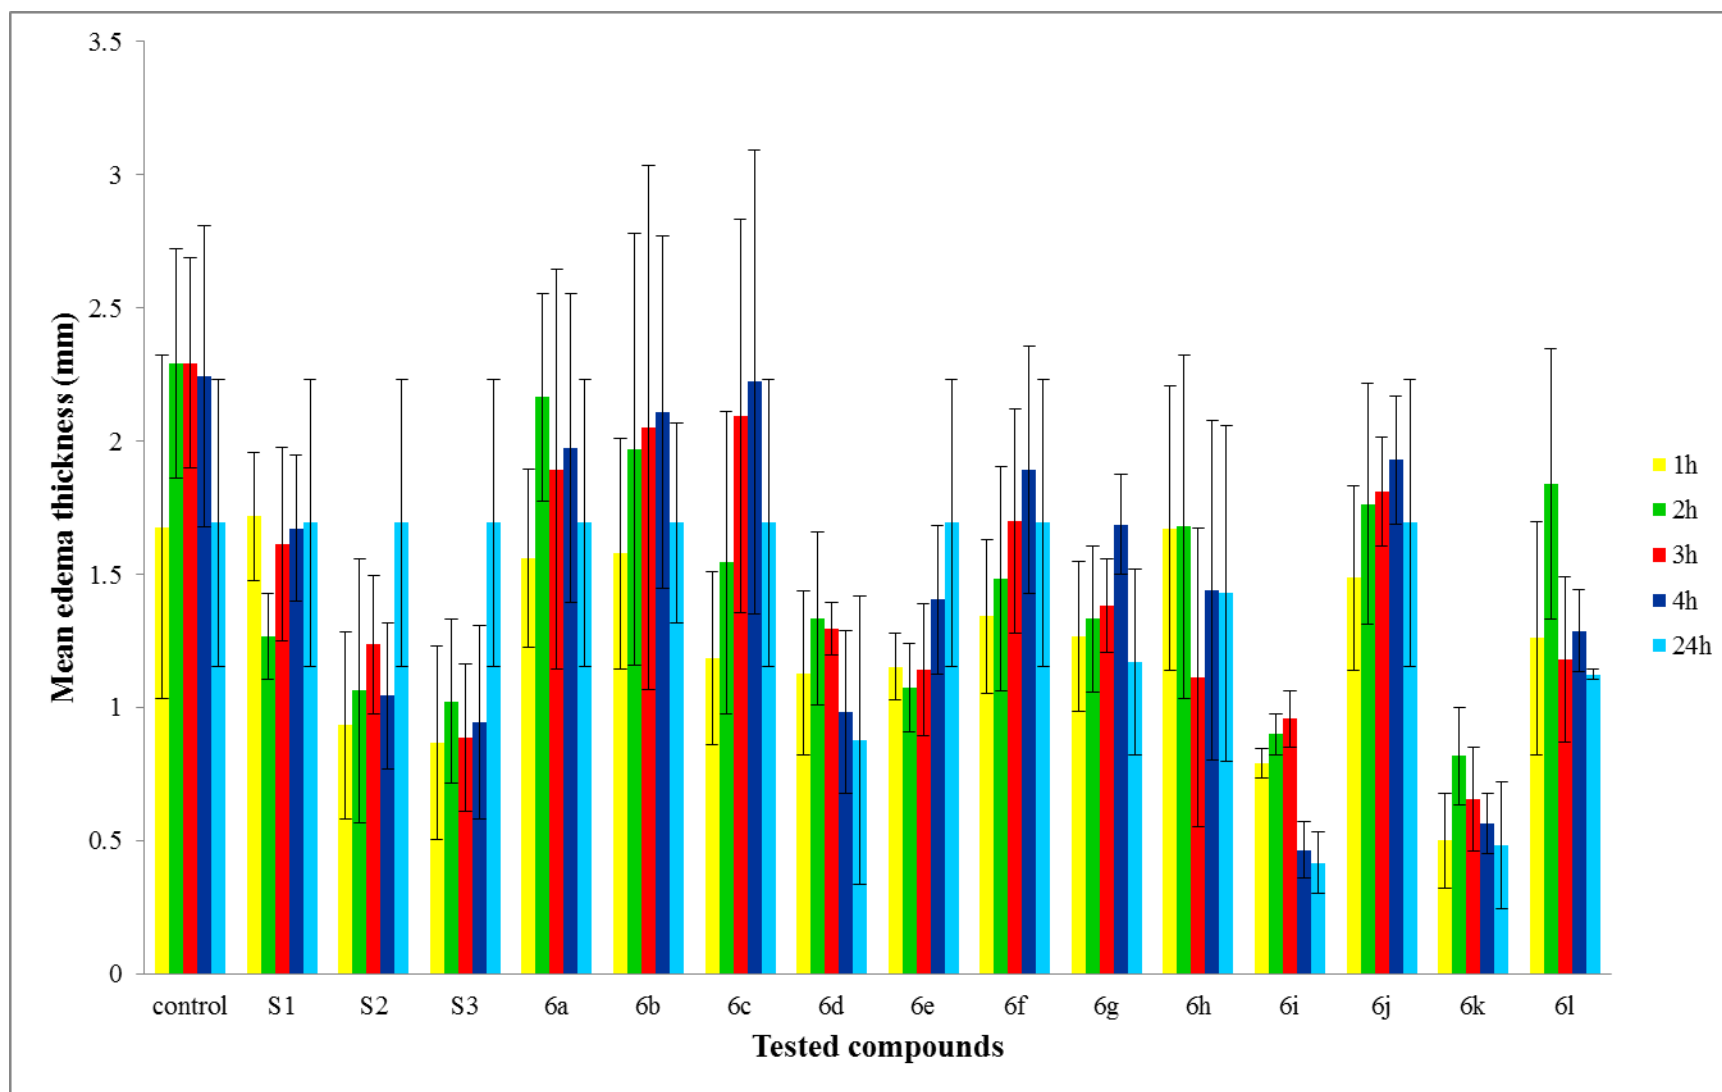

**Figure S1.** Mean edema thickness (mm) of the tested compounds at successive time intervals.

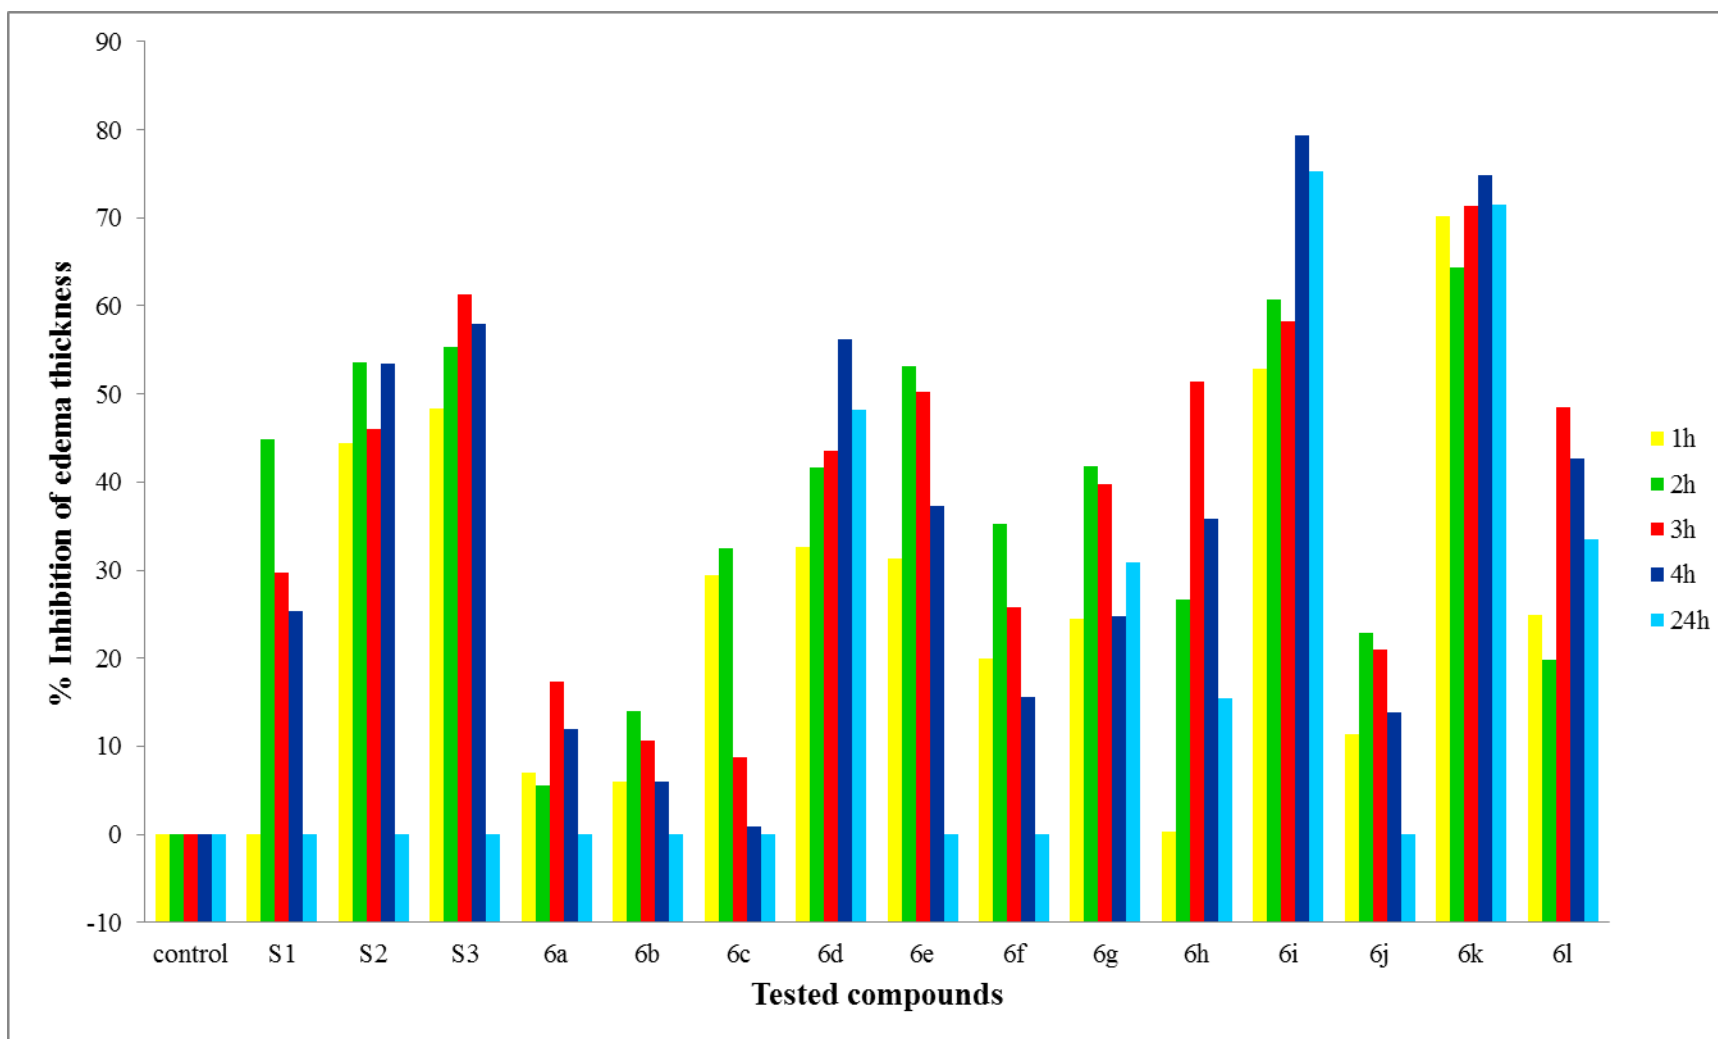

**Figure S2.** % Inhibition of edema for the tested compounds.

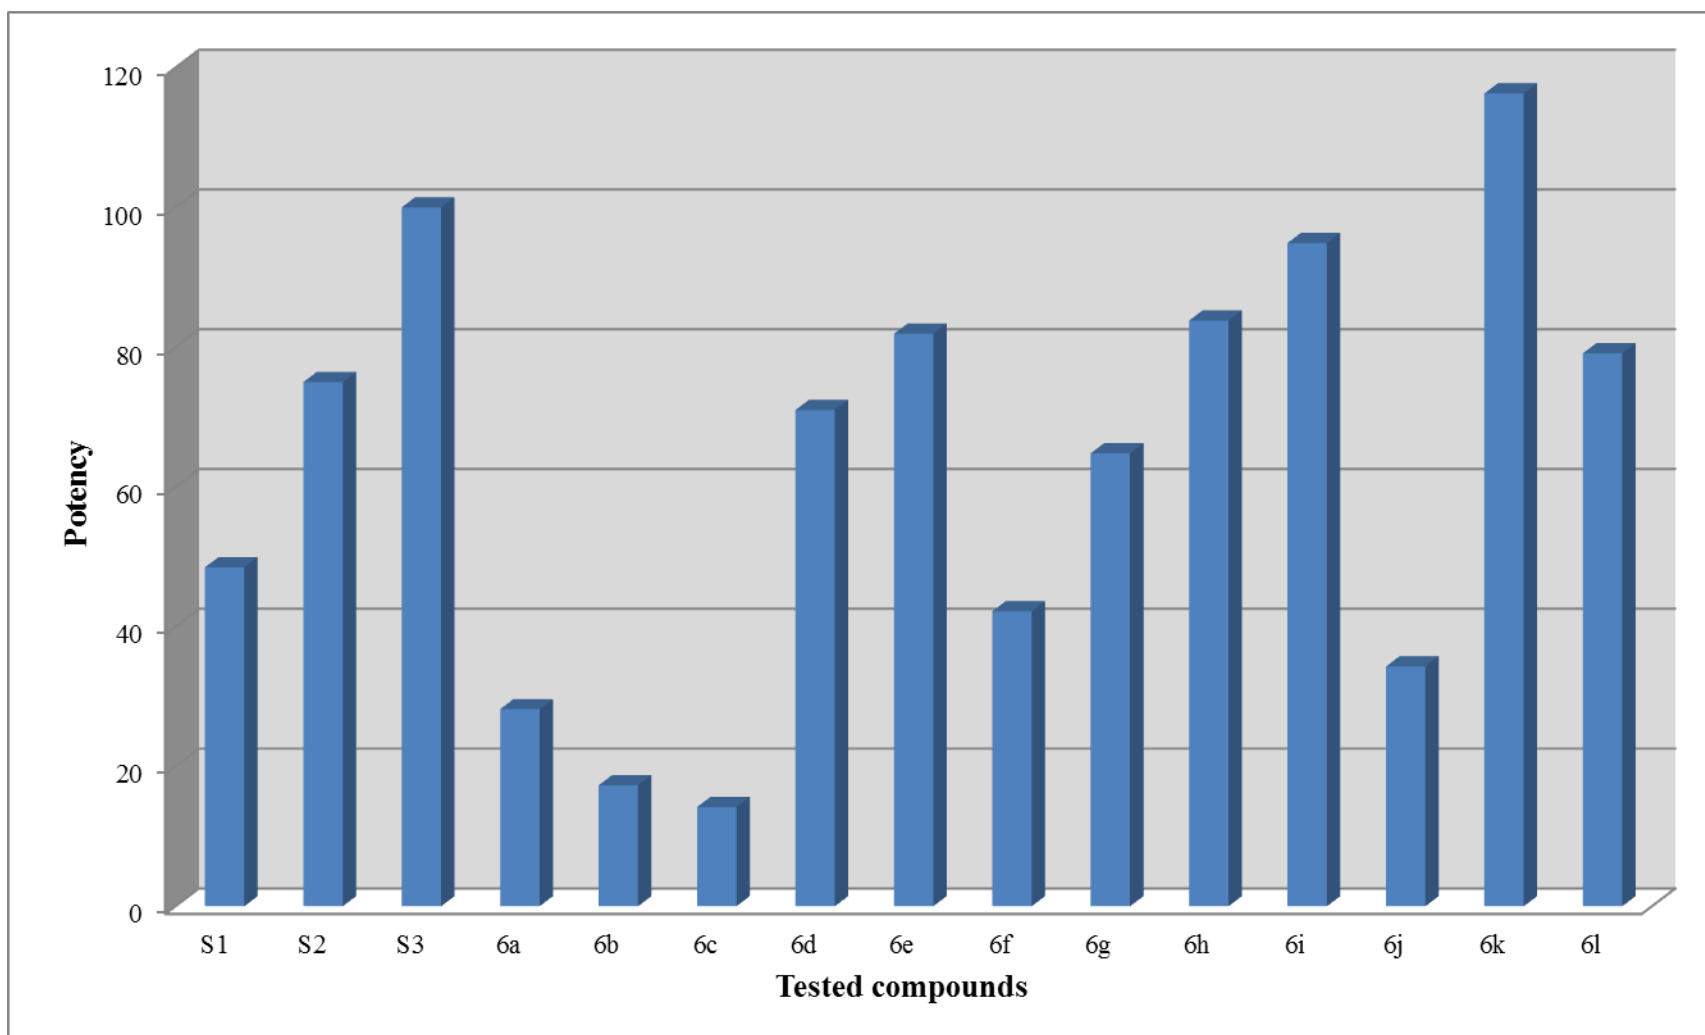

**Figure S3.** Anti-inflammatory potency of the tested compounds.

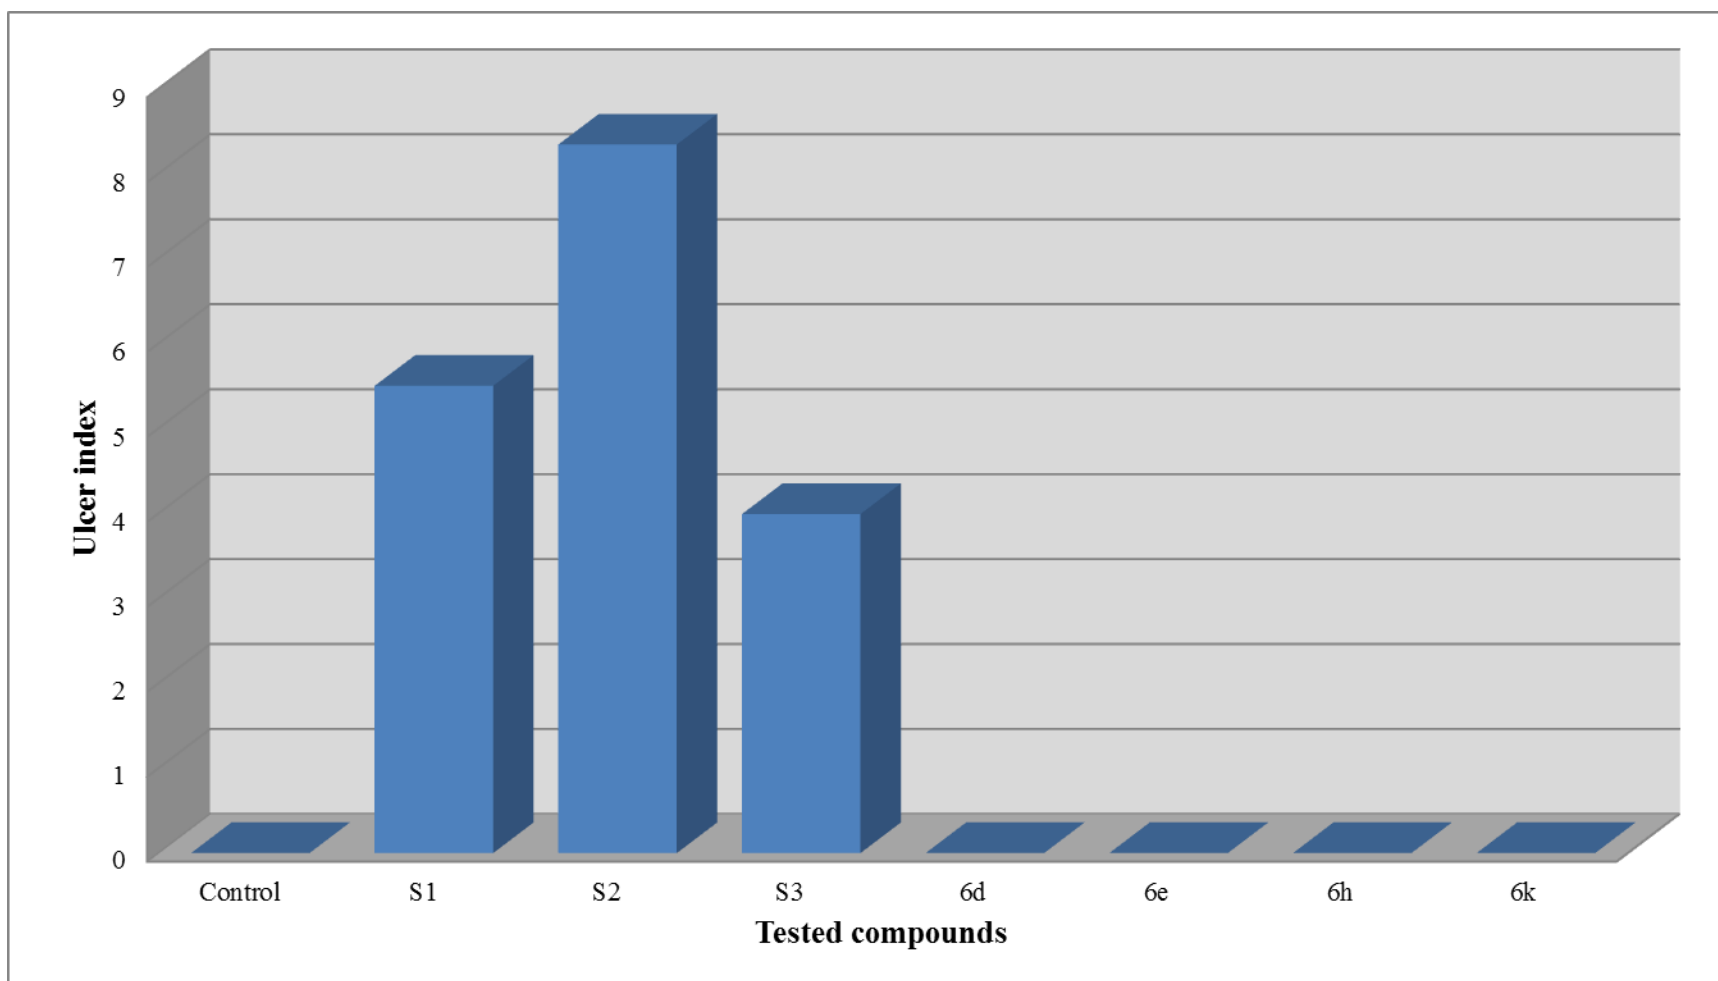

**Figure S4.** Ulcer index of the most promising anti-inflammatory active agents.
